# Supplementary material for: Palladium-catalyzed siloxycarbonylation of alkenes to synthesize silyl esters
Source: Royal Society of Chemistry journal article supplement (doi:10.1039/d4qo00086b), 2024-01-01

*Supporting Information for:*

## **Palladium-catalyzed siloxycarbonylation of alkenes to synthesize silyl esters**

Fei Wu, ‡ Yi-Chuan Zhong, ‡ Bo Wang, Zhi-Hui Ren and Zheng-Hui Guan\*

*Key Laboratory of Synthetic and Nature Functional Molecule of Ministry of  
Education, Department of Chemistry & Materials Science, Northwest University,  
Xi'an 710127, P. R. China*

*Email: guanzhh@nwu.edu.cn*

### **Table of contents**

|                                                                  |            |
|------------------------------------------------------------------|------------|
| <b>1. General Information</b>                                    | <b>S2</b>  |
| <b>2. Preparation of Aromatic Alkenes</b>                        | <b>S3</b>  |
| <b>3. Typical Procedure for the Reaction</b>                     | <b>S5</b>  |
| <b>4. Mechanism Studies</b>                                      | <b>S7</b>  |
| <b>5. Characterization Data of Products</b>                      | <b>S10</b> |
| <b>6. Copies of <sup>1</sup>H and <sup>13</sup>C NMR Spectra</b> | <b>S21</b> |

## 1. General Information.

### Chemicals

Chemicals were commercially purchased from Adamas-beta, Energy Chemical, Aladdin, etc. and directly used without further purification unless otherwise stated. PdCl<sub>2</sub>, PdBr<sub>2</sub>, PdI<sub>2</sub>, Pd(P<sup>t</sup>Bu<sub>3</sub>)<sub>2</sub>, 2-diphenylphosphonium-2',4',6'-triisopropylbiphenyl etc. were purchased from Adamas-beta; *tert*-Butyldimethylsilyl chloride, aldehyde, alkenes, etc. were purchased from Energy Chemical.

### Chromatography

Analytical thin-layer chromatography (TLC) was carried out with silica gel pre-coated glass plates (TLC-Silica gel GF254, coating thickness: 0.20-0.25 mm, particle size: 10-40 μm) purchased from Xinnuo Chemical (Yantai, China). The TLC was visualized with a UV lamp (254 or 365 nm).

Flash Column chromatography was carried out on silica gel (60 Å, 200-300 mesh) purchased from Xinnuo Chemicals (Yantai, China) with technical grade solvents as the eluent. All the yields referred to spectroscopically and chromatographically pure compounds.

### Nuclear Magnetic Resonance (NMR) Spectroscopy

<sup>1</sup>H NMR spectra were recorded on Bruker AVANCE III-400 instrument (400 MHz spectrometer). The analytical sample was dissolved in an appropriate deuterated solvent. The employed deuterated solvent and the measuring frequency are indicated in each <sup>1</sup>H NMR data. Chemical shifts are reported in parts per million (ppm) with the solvent resonance as the internal reference (CDCl<sub>3</sub> δ 7.26). The following abbreviations (or combinations thereof) were used to explain multiplicities: s = singlet, d = doublet, t = triplet, q = quartet, m = multiplet, b = broad. Coupling constants, *J* were reported in Hertz unit (Hz).

<sup>13</sup>C NMR spectra were recorded on Bruker AVANCE III-400 instrument (101 MHz spectrometer). The employed deuterated solvent and the measuring frequency are both indicated in each <sup>13</sup>C NMR data. Chemical shifts are reported in ppm with the solvent resonance as the internal reference (CDCl<sub>3</sub> δ 77.16).

## 2. Preparation of Aromatic Alkenes.

### 2.1 Method A:

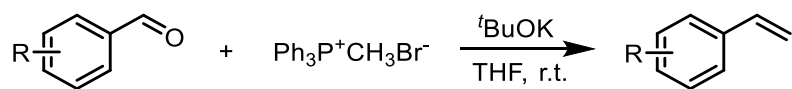

To a 25 ml round bottomed flask were added methyl triphenylphosphonium bromide (7.5 mmol, 1.5 equiv) and  $t\text{BuOK}$  (7.5 mmol, 1.5 equiv). Adding 10 mL of dry THF, the mixture was stirred at room temperature for 1.0 hour. After that diluted ketones or aldehydes (5.0 mmol, 1.0 equiv) in dry THF (2 mL) was added, then the reaction was stirred at room temperature for overnight. The mixture was diluted with  $\text{CH}_2\text{Cl}_2$  (25 mL), washed with brine (3 x 15 mL), dried with  $\text{Na}_2\text{SO}_4$ , filtered and concentrated in vacuo. The crude material was purified by column chromatography (hexanes as the eluent) to afford alkenes.

### 2.2 Method B:

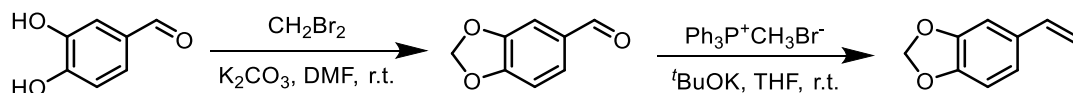

To a 25 ml round bottomed flask were added 3,4-dihydroxybenzaldehyde (5.0 mmol, 1.0 equiv) and  $\text{K}_2\text{CO}_3$  (11.0 mmol, 2.2 equiv). Adding 10 mL of DMF, the mixture was stirred at room temperature for 30 mins. After that diluted dibromomethane (5.0 mmol, 1.0 equiv) in DMF (2 mL) was added, then the reaction was stirred at room temperature for overnight. The mixture was diluted with  $\text{CH}_2\text{Cl}_2$  (25 mL), washed with brine (3 x 15 mL), dried with  $\text{Na}_2\text{SO}_4$ , filtered and concentrated in vacuo. The crude material was purified by column chromatography to afford piperonyl aldehyde. Subsequently, the Wittig reaction was carried out as shown in Method A to obtain 5-vinylbenzo[d][1,3]dioxole.

### 2.3 Method C:

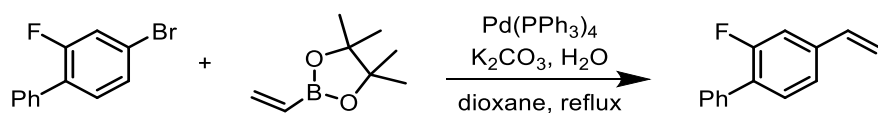

To a 25 ml round bottomed flask were added 4-bromo-2-fluoro-1,1'-biphenyl (1.0 mmol, 1.0 equiv),  $\text{Pd}(\text{PPh}_3)_4$  (0.3 mmol, 0.3 equiv) and  $\text{K}_2\text{CO}_3$  (3.0 mmol, 3.0 equiv) and dissolved with 5 mL of 1,4-dioxane. Subsequently, pinacol vinylboronate (1.5 mmol, 1.5 equiv) and 0.6 mL of  $\text{H}_2\text{O}$  were added to the reaction mixture. The reflux

condenser was quickly installed and filled three times with nitrogen. The reaction was stirred at reflux overnight and the reaction was measured by TLC. After the reaction was completed, the mixture was diluted with  $\text{CH}_2\text{Cl}_2$  (25 mL), washed with brine (3 x 15 mL), dried with  $\text{Na}_2\text{SO}_4$ , filtered and concentrated in vacuo. The crude material was purified by column chromatography (hexanes as the eluent) to afford alkenes.

### 3. Typical Procedure for the Reaction.

#### 3.1 Reaction Conditions for Table 2 in Maintext:

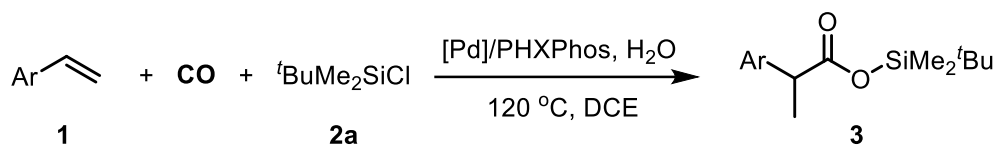

To a dry and stirred glass vessel, alkene **1** (0.2 mmol, 1.0 equiv), PdCl<sub>2</sub> (0.005 mmol, 2.5 mol%), PHXPhos (0.012 mmol, 6.0 mol%) and DCE (0.6 mL) were added. To the above mixture, *t*BuMe<sub>2</sub>SiCl **2a** (0.4 mmol, 2.0 equiv) and H<sub>2</sub>O (0.2 mmol, 1.0 equiv) were added. The glass vessel was then put into an autoclave. The autoclave was evacuated and backfilled with CO for three times in a well-ventilated fume hood and then pressurized to 40 atm of CO. The reaction mixture in autoclave was stirred at 120 °C for 24 h. After the reaction completed, the autoclave was cooled down to room temperature. Then, the CO in autoclave was carefully released in a well-ventilated fume hood. The regioselectivity listed in Table 2 in maintext was directly measured by GC-MS analysis of these crude products and using *n*-hexadecane as the internal standard. The yields listed in Table 2 in maintext were based on the isolated yields of silyl ester by flash column chromatography on silica gel.

#### 3.2 Conditions and Procedure of Silyl Ester Derivatization Experiments:

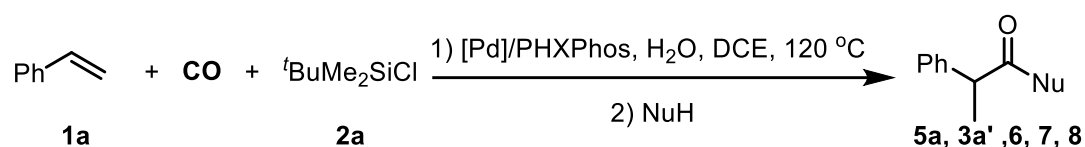

The Markovnikov hydrocarboxylation of styrene for the formation of the corresponding branched silyl esters were carried out under the standard conditions as described above in **3.1**.

After the reaction completed, the glass vessel was taken out from autoclave. For **5a, 3a'**: to the mixture of glass vessel, the solution of NuH (3.0 M in DCM, 0.3 mmol, 1.5 equiv) was added and stirred overnight at room temperature. The reaction mixture was concentrated under reduced pressure. The corresponding ester **3a'** and acid **5a** were purified by flash column chromatography on silica gel. For **6, 7, 8**: to the mixture of glass vessel, the solution of NuH (3.0 M in DCM, 0.3 mmol, 1.5 equiv), HBTU (0.4

mmol, 2.0 equiv) and  $\text{NEt}_3$  (0.4 mmol, 2.0 equiv) was added and stirred overnight at room temperature. The reaction mixture was concentrated under reduced pressure. The corresponding esters and amides were purified by flash column chromatography on silica gel.

## 4. Mechanism Studies.

### 4.1 The Control Experiments by (1-Chloroethyl) benzene as the Substrate.

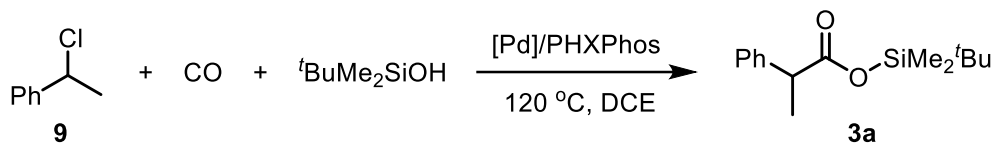

To a dry and stirred glass vessel, (1-chloroethyl)benzene **9** (0.2 mmol, 1.0 equiv), PdCl<sub>2</sub> (0.005 mmol, 2.5 mol%), PHXPhos (0.012 mmol, 6.0 mol%) and DCE (0.6 mL) were added. To the above mixture, <sup>t</sup>BuMe<sub>2</sub>SiOH (0.3 mmol, 1.5 equiv) was added. The glass vessel was then put into an autoclave. The autoclave was evacuated and backfilled with CO for three times in a well-ventilated fume hood and then pressurized to 40 atm of CO. The reaction mixture in autoclave was stirred at 120 °C for 24 h. After the reaction completed, the autoclave was cooled down to room temperature. Then, the CO in autoclave was carefully released in a well-ventilated fume hood. No any silyl ester **3a** was observed by GC-MS analysis of these crude products.

### 4.2 The Control Experiments by Silanol as the Substrate.

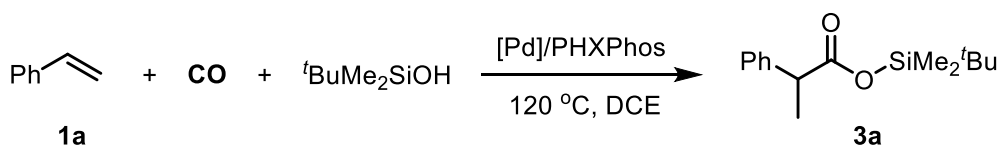

To a dry and stirred glass vessel, styrene **1a** (0.2 mmol, 1.0 equiv), PdCl<sub>2</sub> (0.005 mmol, 2.5 mol%), PHXPhos (0.012 mmol, 6.0 mol%) and DCE (0.6 mL) were added. To the above mixture, <sup>t</sup>BuMe<sub>2</sub>SiOH (0.3 mmol, 1.5 equiv) was added. The glass vessel was then put into an autoclave. The autoclave was evacuated and backfilled with CO for three times in a well-ventilated fume hood and then pressurized to 40 atm of CO. The reaction mixture in autoclave was stirred at 120 °C for 24 h. After the reaction completed, the autoclave was cooled down to room temperature. Then, the CO in autoclave was carefully released in a well-ventilated fume hood. The trace of silyl ester **3a** was directly measured by GC-MS analysis of these crude products.

### 4.3 The Control Experiments by 2-Phenylpropanoic Acid as the Substrate.

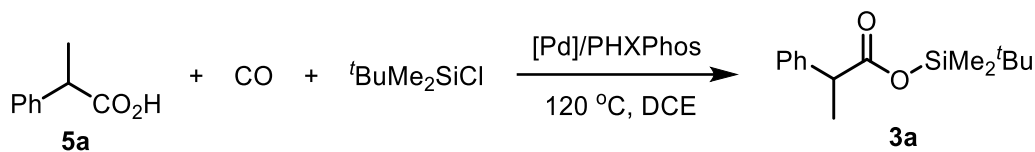

To a dry and stirred glass vessel, 2-phenylpropanoic acid **5a** (0.2 mmol, 1.0 equiv), PdCl<sub>2</sub> (0.005 mmol, 2.5 mol%), PHXPhos (0.012 mmol, 6.0 mol%) and DCE (0.6 mL) were added. To the above mixture, <sup>t</sup>BuMe<sub>2</sub>SiCl (0.3 mmol, 1.5 equiv) was added. The glass vessel was then put into an autoclave. The autoclave was evacuated and backfilled with CO for three times in a well-ventilated fume hood and then pressurized to 40 atm of CO. The reaction mixture in autoclave was stirred at 120 °C for 24 h. After the reaction completed, the autoclave was cooled down to room temperature. Then, the CO in autoclave was carefully released in a well-ventilated fume hood. The yield of silyl ester **3a** (37% yield) was directly measured by GC-MS analysis of these crude products using *n*-hexadecane as the internal standard.

### 4.4 The Two-chamber Experiment.

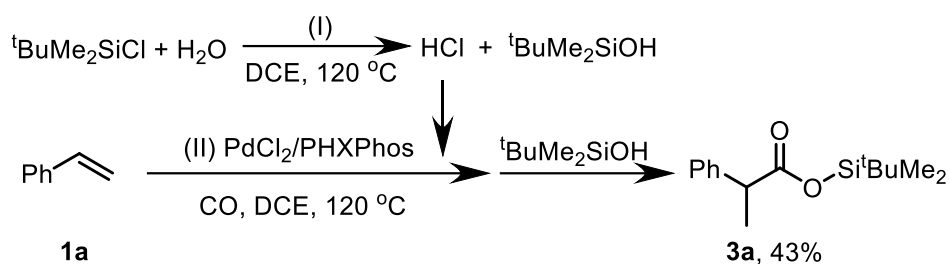

In a glove box, to chamber I of a two-chamber reactor was added <sup>t</sup>BuMe<sub>2</sub>SiCl (1 mmol, 5 equiv.), H<sub>2</sub>O (1 mmol, 5 equiv.), and DCE (5 mL). To chamber II of a two-chamber reactor was added with styrene **1a** (0.2 mmol, 1.0 equiv), PdCl<sub>2</sub> (0.005 mmol, 2.5 mol%), PHXPhos (0.012 mmol, 6.0 mol%) and DCE (0.6 mL). The two-chamber reactor was put into an autoclave. The autoclave was evacuated and backfilled with CO for three times in a well-ventilated fume hood and then pressurized to 40 atm of CO. The reaction mixture in autoclave was stirred at 120 °C for 24 h. After the reaction completed, the autoclave was cooled down to room temperature. Then, the CO in autoclave was carefully released in a well-ventilated fume hood. Take out the two-chamber reactor. <sup>t</sup>BuMe<sub>2</sub>SiOH (0.4 mmol, 2.0 equiv) and Et<sub>3</sub>N (0.4 mmol, 2.0 equiv)



was added into chamber II, and was stirred for 1h under room temperature. The yield of silyl ester **3a** (43% yield) was determined by GC-MS using *n*-hexadecane as the internal standard.

## 5. Characterization Data of Products.

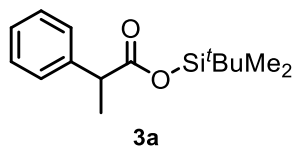

**Tert-butyldimethylsilyl-2-phenylpropanoate (3a):** Colorless oil, 93% yield (49.1 mg), b/l > 99:1,  $^1\text{H}$  NMR (400 MHz, Chloroform-*d*)  $\delta$  7.32-7.27 (m, 4H), 7.24-7.20 (m, 1H), 3.68 (q,  $J = 7.2$  Hz, 1H), 1.48 (d,  $J = 7.2$  Hz, 3H), 0.81 (s, 9H), 0.21 (s, 3H), 0.17 (s, 3H);  $^{13}\text{C}$  NMR (101 MHz, Chloroform-*d*)  $\delta$  174.8, 141.0, 128.6, 127.6, 127.0, 47.2, 25.4, 18.2, 17.6, -4.8, -5.1. HRMS calcd. (ESI) m/z for  $\text{C}_{15}\text{H}_{24}\text{O}_2\text{SiNa}$   $[\text{M}+\text{Na}]^+$ : 287.1437, found: 287.1433.

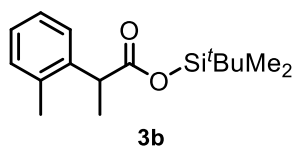

**Tert-butyldimethylsilyl-2-(*o*-tolyl)propanoate (3b):** Colorless oil, 87% yield (48.4 mg), b/l = 98:2,  $^1\text{H}$  NMR (400 MHz, Chloroform-*d*)  $\delta$  7.26-7.21 (m, 1H), 7.19-7.11 (m, 3H), 3.93 (q,  $J = 7.2$  Hz, 1H), 2.37 (s, 3H), 1.46 (d,  $J = 7.2$  Hz, 3H), 0.77 (s, 9H), 0.21 (s, 3H), 0.17 (s, 3H);  $^{13}\text{C}$  NMR (101 MHz, Chloroform-*d*)  $\delta$  175.0, 139.7, 135.8, 130.5, 126.9, 126.5, 126.4, 43.0, 25.4, 19.8, 17.7, 17.6, -4.8, -5.1. HRMS calcd. (ESI) m/z for  $\text{C}_{16}\text{H}_{26}\text{O}_2\text{SiNa}$   $[\text{M}+\text{Na}]^+$ : 301.1594, found: 301.1566.

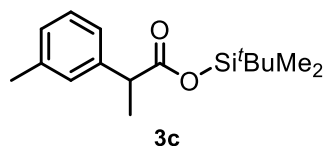

**Tert-butyldimethylsilyl-2-(*m*-tolyl)propanoate (3c):** Colorless oil, 89% yield (49.5 mg), b/l > 99:1,  $^1\text{H}$  NMR (400 MHz, Chloroform-*d*)  $\delta$  7.19 (t,  $J = 7.6$  Hz, 1H), 7.12-7.03 (m, 3H), 3.65 (q,  $J = 7.2$  Hz, 1H), 2.33 (s, 3H), 1.48 (d,  $J = 7.2$  Hz, 3H), 0.83 (s, 9H), 0.22 (s, 3H), 0.18 (s, 3H);  $^{13}\text{C}$  NMR (101 MHz, Chloroform-*d*)  $\delta$  175.0, 140.9, 138.1, 128.5, 128.5, 127.8, 124.7, 47.2, 25.5, 21.5, 18.2, 17.7, -4.8, -5.0. HRMS calcd. (ESI) m/z for  $\text{C}_{16}\text{H}_{26}\text{O}_2\text{SiH}$   $[\text{M}+\text{H}]^+$ : 279.1774, found: 279.1747.

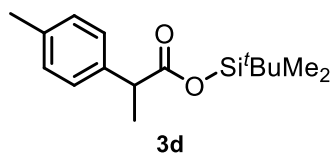

**Tert-butyldimethylsilyl-2-(*p*-tolyl)propanoate (3d):** Colorless oil, 92% yield (51.2 mg), b/l > 99:1,  $^1\text{H}$  NMR (400 MHz, Chloroform-*d*)  $\delta$  7.17 (d,  $J = 8.0$  Hz, 2H), 7.11 (d,  $J = 8.0$  Hz, 2H), 3.65 (q,  $J = 7.2$  Hz, 1H), 2.32 (s, 3H), 1.46 (d,  $J = 7.2$  Hz, 3H), 0.83 (s, 9H), 0.21 (s, 3H), 0.17 (s, 3H);  $^{13}\text{C}$  NMR (101 MHz, Chloroform-*d*)  $\delta$  175.1, 138.0, 136.6, 129.3, 127.5, 46.9, 25.5, 21.2, 18.4, 17.7, -4.8, -5.0. HRMS calcd. (ESI)  $m/z$  for  $\text{C}_{16}\text{H}_{26}\text{O}_2\text{SiNa}$   $[\text{M}+\text{Na}]^+$ : 301.1594, found: 301.1591.

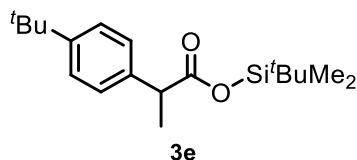

**Tert-butyldimethylsilyl-2-(4-(tert-butyl)phenyl)propanoate (3e):** Colorless oil, 94% yield (60.2 mg), b/l > 99:1,  $^1\text{H}$  NMR (400 MHz, Chloroform-*d*)  $\delta$  7.32 (d,  $J = 8.0$  Hz, 2H), 7.20 (d,  $J = 8.0$  Hz, 2H), 3.66 (q,  $J = 7.2$  Hz, 1H), 1.47 (d,  $J = 7.2$  Hz, 3H), 1.29 (s, 9H), 0.79 (s, 9H), 0.20 (s, 3H), 0.17 (s, 3H);  $^{13}\text{C}$  NMR (101 MHz, Chloroform-*d*)  $\delta$  175.1, 149.9, 137.9, 127.3, 125.5, 46.8, 34.5, 31.5, 25.5, 18.2, 17.7, -4.8, -5.0. HRMS calcd. (ESI)  $m/z$  for  $\text{C}_{19}\text{H}_{32}\text{O}_2\text{SiNa}$   $[\text{M}+\text{Na}]^+$ : 343.2063, found: 343.2067.

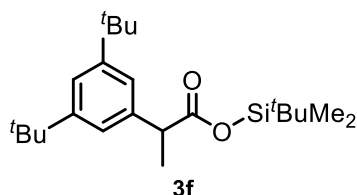

**Tert-butyldimethylsilyl-2-(3,5-di-tert-butylphenyl)propanoate (3f):** Colorless oil, 84% yield (63.2 mg), b/l > 99:1,  $^1\text{H}$  NMR (400 MHz, Chloroform-*d*)  $\delta$  7.33 (s, 1H), 7.14 (s, 2H), 3.70 (q,  $J = 7.0$  Hz, 1H), 1.52 (d,  $J = 7.2$  Hz, 3H), 1.34 (s, 18H), 0.78 (s, 9H), 0.24 (s, 3H), 0.19 (s, 3H);  $^{13}\text{C}$  NMR (101 MHz, Chloroform-*d*)  $\delta$  175.2, 150.9, 140.3, 121.8, 121.0, 47.8, 34.9, 31.6, 25.4, 18.2, 17.7, -4.8, -5.1. HRMS calcd. (ESI)  $m/z$  for  $\text{C}_{23}\text{H}_{40}\text{O}_2\text{SiNa}$   $[\text{M}+\text{Na}]^+$ : 399.2689, found: 399.2677.

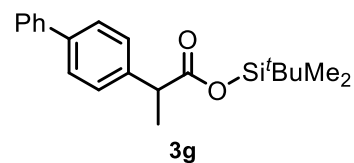

**Tert-butyldimethylsilyl-2-([1,1'-biphenyl]-4-yl)propanoate (3g):** Colorless oil, 90% yield (61.2 mg), b/l > 99:1, <sup>1</sup>H NMR (400 MHz, Chloroform-*d*) δ 7.60-7.53 (m, 4H), 7.45-7.33 (m, 5H), 3.74 (q, *J* = 7.2 Hz, 1H), 1.53 (d, *J* = 7.6 Hz, 3H), 0.83 (s, 9H), 0.23 (s, 3H), 0.19 (s, 3H); <sup>13</sup>C NMR (101 MHz, Chloroform-*d*) δ 174.9, 145.4, 141.0, 140.1, 140.0, 128.9, 128.1, 127.3, 127.2, 47.0, 25.5, 18.3, 17.7, -4.8, -4.9. HRMS calcd. (ESI) m/z for C<sub>21</sub>H<sub>28</sub>O<sub>2</sub>SiNa [M+Na]<sup>+</sup>: 363.1750, found: 363.1758.

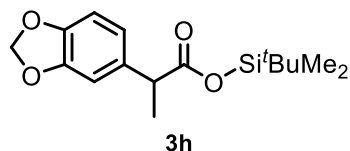

**Tert-butyldimethylsilyl-2-(benzo[*d*][1,3]dioxol-5-yl)propanoate (3h):** Colorless oil, 95% yield (58.5 mg), b/l > 99:1, <sup>1</sup>H NMR (400 MHz, Chloroform-*d*) δ 6.80 (s, 1H), 6.74 (s, 2H), 5.93 (s, 2H), 3.61 (q, *J* = 7.2 Hz, 1H), 1.44 (d, *J* = 7.2 Hz, 3H), 0.85 (s, 9H), 0.22 (s, 3H), 0.19 (s, 3H); <sup>13</sup>C NMR (101 MHz, Chloroform-*d*) δ 174.9, 147.8, 146.6, 134.9, 120.9, 108.3, 108.1, 101.1, 46.9, 25.5, 18.5, 17.7, -4.8, -5.0. HRMS calcd. (ESI) m/z for C<sub>16</sub>H<sub>24</sub>O<sub>4</sub>SiNa [M+Na]<sup>+</sup>: 331.1336, found: 331.1326.

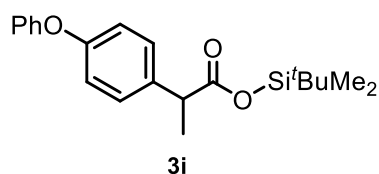

**Tert-butyldimethylsilyl-2-(4-phenoxyphenyl)propanoate (3i):** Colorless oil, 78% yield (55.5 mg), b/l > 99:1, <sup>1</sup>H NMR (400 MHz, Chloroform-*d*) δ 7.29 (dt, *J* = 20.4, 8.0 Hz, 3H), 7.09 (t, *J* = 7.4 Hz, 1H), 7.03 (d, *J* = 7.6 Hz, 1H), 7.00-6.94 (m, 3H), 6.88 (dd, *J* = 8.0, 2.0 Hz, 1H), 3.66 (q, *J* = 7.2 Hz, 1H), 1.46 (d, *J* = 7.6 Hz, 3H), 0.82 (s, 9H), 0.21 (s, 3H), 0.18 (s, 3H); <sup>13</sup>C NMR (101 MHz, Chloroform-*d*) δ 174.5, 157.4, 157.3, 143.1, 129.9, 123.3, 122.7, 118.9, 118.4, 117.6, 47.2, 25.5, 18.2, 17.7, -4.8, -5.0. HRMS calcd. (ESI) m/z for C<sub>21</sub>H<sub>28</sub>O<sub>3</sub>SiNa [M+Na]<sup>+</sup>: 379.1699, found: 379.1692.

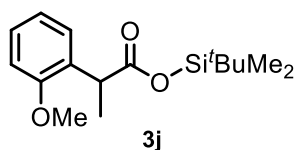

**Tert-butyldimethylsilyl-2-(2-methoxyphenyl)propanoate (3j):** Colorless oil, 89% yield (52.3 mg), b/l = 97:3, <sup>1</sup>H NMR (400 MHz, Chloroform-*d*) δ 7.24-7.16 (m,

2H), 6.91 (t,  $J = 7.4$  Hz, 1H), 6.84 (d,  $J = 8.0$  Hz, 1H), 3.96 (q,  $J = 7.2$  Hz, 1H), 3.80 (s, 3H), 1.45 (d,  $J = 7.2$  Hz, 3H), 0.76 (s, 9H), 0.23 (s, 3H), 0.20 (s, 3H);  $^{13}\text{C}$  NMR (101 MHz, Chloroform- $d$ )  $\delta$  175.4, 156.9, 130.1, 128.3, 128.0, 120.6, 110.4, 55.3, 41.4, 25.4, 17.6, 16.9, -4.8, -5.1. HRMS calcd. (ESI)  $m/z$  for  $\text{C}_{16}\text{H}_{26}\text{O}_3\text{SiNa}$   $[\text{M}+\text{Na}]^+$ : 317.1543, found: 317.1536.

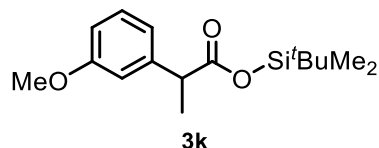

**Tert-butyldimethylsilyl-2-(3-methoxyphenyl)propanoate (3k):** Colorless oil, 93% yield (54.7 mg), b/l > 99:1,  $^1\text{H}$  NMR (400 MHz, Chloroform- $d$ )  $\delta$  7.23 (t,  $J = 7.6$  Hz, 1H), 6.88 (d,  $J = 7.6$  Hz, 1H), 6.84 (s, 1H), 6.82-6.74 (m, 1H), 3.80 (s, 3H), 3.67 (q,  $J = 7.2$  Hz, 1H), 1.48 (d,  $J = 7.6$  Hz, 3H), 0.83 (s, 9H), 0.23 (s, 3H), 0.19 (s, 3H);  $^{13}\text{C}$  NMR (101 MHz, Chloroform- $d$ )  $\delta$  174.7, 159.8, 142.6, 129.6, 120.1, 113.3, 112.6, 55.3, 47.3, 25.5, 18.3, 17.7, -4.8, -5.0. HRMS calcd. (ESI)  $m/z$  for  $\text{C}_{16}\text{H}_{26}\text{O}_3\text{SiNa}$   $[\text{M}+\text{Na}]^+$ : 317.1543, found: 317.1540.

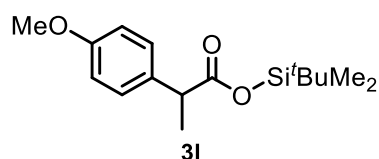

**Tert-butyldimethylsilyl-2-(4-methoxyphenyl)propanoate (3l):** Colorless oil, 91% yield (53.5 mg), b/l > 99:1,  $^1\text{H}$  NMR (400 MHz, Chloroform- $d$ )  $\delta$  7.21 (d,  $J = 8.4$  Hz, 2H), 6.85 (d,  $J = 8.4$  Hz, 2H), 3.79 (s, 3H), 3.64 (q,  $J = 7.2$  Hz, 1H), 1.46 (d,  $J = 7.2$  Hz, 3H), 0.83 (s, 9H), 0.21 (s, 3H), 0.17 (s, 3H);  $^{13}\text{C}$  NMR (101 MHz, Chloroform- $d$ )  $\delta$  175.2, 158.7, 133.2, 128.7, 114.0, 55.4, 46.4, 25.5, 18.4, 17.7, -4.8, -5.0. HRMS calcd. (ESI)  $m/z$  for  $\text{C}_{16}\text{H}_{26}\text{O}_3\text{SiNa}$   $[\text{M}+\text{Na}]^+$ : 317.1543, found: 317.1536.

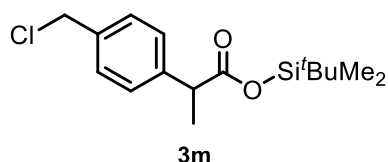

**Tert-butyldimethylsilyl-2-(4-(chloromethyl)phenyl)propanoate (3m):** Colorless oil, 85% yield (53.2 mg), b/l > 99:1,  $^1\text{H}$  NMR (400 MHz, Chloroform- $d$ )  $\delta$  7.34 (d,  $J = 8.0$  Hz, 2H), 7.28 (d,  $J = 7.6$  Hz, 2H), 4.57 (s, 2H), 3.70 (q,  $J = 7.2$  Hz, 1H),

1.48 (d,  $J = 7.2$  Hz, 3H), 0.82 (s, 9H), 0.22 (s, 3H), 0.18 (s, 3H);  $^{13}\text{C}$  NMR (101 MHz, Chloroform-*d*)  $\delta$  174.6, 141.3, 136.3, 128.9, 128.1, 47.0, 46.1, 25.5, 18.3, 17.7, -4.8, -5.0. HRMS calcd. (ESI)  $m/z$  for  $\text{C}_{16}\text{H}_{25}\text{ClO}_2\text{SiNa}$   $[\text{M}+\text{Na}]^+$ : 335.1204, found: 335.1211.

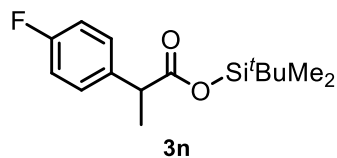

**Tert-butyldimethylsilyl-2-(4-fluorophenyl)propanoate (3n):** Colorless oil, 76% yield (42.9 mg),  $b/l > 99:1$ ,  $^1\text{H}$  NMR (400 MHz, Chloroform-*d*)  $\delta$  7.28-7.22 (m, 2H), 7.04-6.96 (m, 2H), 3.68 (q,  $J = 7.2$  Hz, 1H), 1.47 (d,  $J = 6.8$  Hz, 3H), 0.82 (s, 9H), 0.21 (s, 3H), 0.17 (s, 3H);  $^{13}\text{C}$  NMR (101 MHz, Chloroform-*d*)  $\delta$  174.7, 162.0 (d,  $J = 246.4$  Hz), 136.7, 129.2 (d,  $J = 9.3$  Hz), 115.4 (d,  $J = 22.6$  Hz), 46.5, 25.5, 18.3, 17.7, -4.8, -5.0. HRMS calcd. (ESI)  $m/z$  for  $\text{C}_{15}\text{H}_{23}\text{FO}_2\text{SiNa}$   $[\text{M}+\text{Na}]^+$ : 305.1343, found: 305.1355.

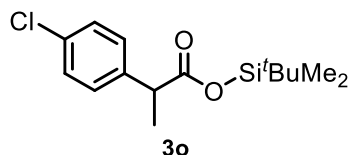

**Tert-butyldimethylsilyl-2-(4-chlorophenyl)propanoate (3o):** Colorless oil, 81% yield (48.3 mg),  $b/l > 99:1$ ,  $^1\text{H}$  NMR (400 MHz, Chloroform-*d*)  $\delta$  7.31-7.26 (m, 2H), 7.24-7.20 (m, 2H), 3.67 (q,  $J = 7.2$  Hz, 1H), 1.47 (d,  $J = 7.2$  Hz, 3H), 0.83 (s, 9H), 0.22 (s, 3H), 0.17 (s, 3H);  $^{13}\text{C}$  NMR (101 MHz, Chloroform-*d*)  $\delta$  174.4, 139.5, 132.9, 129.1, 128.7, 46.7, 25.5, 18.3, 17.7, -4.8, -5.0. HRMS calcd. (ESI)  $m/z$  for  $\text{C}_{15}\text{H}_{23}\text{ClO}_2\text{SiNa}$   $[\text{M}+\text{Na}]^+$ : 321.1048, found: 321.1038.

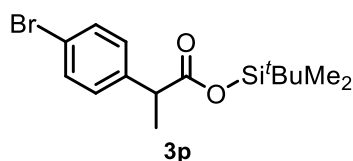

**Tert-butyldimethylsilyl-2-(4-bromophenyl)propanoate (3p):** Colorless oil, 84% yield (57.6 mg),  $b/l > 99:1$ ,  $^1\text{H}$  NMR (400 MHz, Chloroform-*d*)  $\delta$  7.44 (d,  $J = 8.4$  Hz, 2H), 7.17 (d,  $J = 8.0$  Hz, 2H), 3.66 (q,  $J = 7.2$  Hz, 1H), 1.47 (d,  $J = 7.2$  Hz, 3H), 0.83 (s, 9H), 0.22 (s, 3H), 0.18 (s, 3H);  $^{13}\text{C}$  NMR (101 MHz, Chloroform-*d*)  $\delta$  174.3, 140.0, 131.7, 129.4, 121.0, 46.7, 25.5, 18.2, 17.7, -4.8, -5.0. HRMS calcd. (ESI)  $m/z$  for  $\text{C}_{16}\text{H}_{26}\text{BrO}_2\text{SiNa}$   $[\text{M}+\text{Na}]^+$ : 367.0523, found: 367.0596.

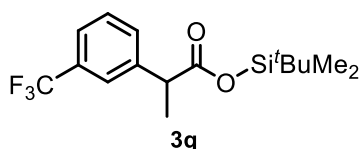

***Tert*-butyldimethylsilyl-2-(3-(trifluoromethyl)phenyl)propanoate (3q):**

Colorless oil, 70% yield (46.5 mg), b/l > 99:1, <sup>1</sup>H NMR (400 MHz, Chloroform-*d*) δ 7.56-7.43 (m, 4H), 3.76 (q, *J* = 7.2 Hz, 1H), 1.52 (d, *J* = 6.8 Hz, 3H), 0.80 (s, 9H), 0.20 (d, *J* = 16.4 Hz, 6H); <sup>13</sup>C NMR (101 MHz, Chloroform-*d*) δ 174.1, 141.9, 131.1, 130.8, 129.1, 125.6, 124.7 (d, *J* = 4.6 Hz), 124.0 (d, *J* = 4.8 Hz), 47.1, 25.4, 18.1, 17.6, -4.8, -5.1. HRMS calcd. (ESI) *m/z* for C<sub>16</sub>H<sub>23</sub>F<sub>3</sub>O<sub>2</sub>SiH [M+H]<sup>+</sup>: 333.1492, found: 333.1486.

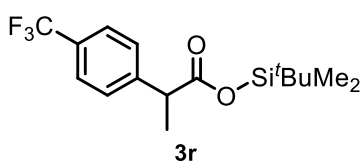

***Tert*-butyldimethylsilyl-2-(4-(trifluoromethyl)phenyl)propanoate (3r):**

Colorless oil, 72% yield (47.8 mg), b/l > 99:1, <sup>1</sup>H NMR (400 MHz, Chloroform-*d*) δ 7.58 (d, *J* = 7.6 Hz, 2H), 7.41 (d, *J* = 8.0 Hz, 2H), 3.76 (q, *J* = 7.2 Hz, 1H), 1.51 (d, *J* = 7.2 Hz, 3H), 0.82 (s, 9H), 0.23 (s, 3H), 0.18 (s, 3H); <sup>13</sup>C NMR (101 MHz, Chloroform-*d*) δ 174.1, 155.1, 145.0, 128.1, 125.6 (d, *J* = 3.4 Hz), 47.2, 25.4, 18.2, 17.7, -4.8, -5.0. HRMS calcd. (ESI) *m/z* for C<sub>16</sub>H<sub>23</sub>F<sub>3</sub>O<sub>2</sub>SiH [M+H]<sup>+</sup>: 333.1492, found: 333.1483.

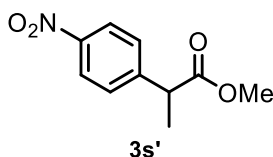

**Methyl-2-(4-nitrophenyl)propanoate (3s')**: Colorless oil, 63% yield (26.3 mg), b/l > 99:1, <sup>1</sup>H NMR (400 MHz, Chloroform-*d*) δ 8.20 (d, *J* = 8.4 Hz, 2H), 7.48 (d, *J* = 8.8 Hz, 2H), 3.86 (q, *J* = 7.2 Hz, 1H), 3.69 (s, 3H), 1.55 (d, *J* = 6.8 Hz, 3H); <sup>13</sup>C NMR (101 MHz, Chloroform-*d*) δ 173.8, 147.8, 147.2, 128.7, 124.0, 52.5, 45.4, 18.5.

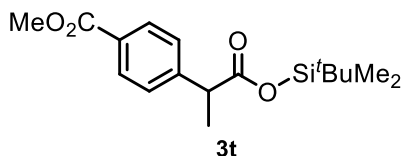

**Methyl-4-(1-((*tert*-butyldimethylsilyloxy)-1-oxopropan-2-yl)benzoate (3t):** Colorless oil, 76% yield (48.9 mg), b/l > 99:1, <sup>1</sup>H NMR (400 MHz, Chloroform-*d*) δ

7.99 (d,  $J = 8.4$  Hz, 2H), 7.36 (d,  $J = 8.4$  Hz, 2H), 3.91 (s, 3H), 3.75 (q,  $J = 7.2$  Hz, 1H), 1.51 (d,  $J = 5.2$  Hz, 3H), 0.80 (s, 9H), 0.22 (s, 3H), 0.17 (s, 3H);  $^{13}\text{C}$  NMR (101 MHz, Chloroform- $d$ )  $\delta$  174.1, 167.1, 146.2, 130.0, 129.0, 127.8, 52.2, 47.4, 25.5, 18.1, 17.7, -4.8, -5.0. HRMS calcd. (ESI)  $m/z$  for  $\text{C}_{17}\text{H}_{26}\text{O}_4\text{SiNa}$   $[\text{M}+\text{Na}]^+$ : 345.1492, found: 345.1507.

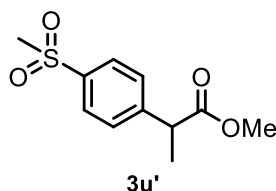

**Methyl-2-(4-(methylsulfonyl)phenyl)propanoate (3u')**: Colorless oil, 66% yield (31.9 mg), b/l > 99:1,  $^1\text{H}$  NMR (400 MHz, Chloroform- $d$ )  $\delta$  7.91 (d,  $J = 8.0$  Hz, 2H), 7.51 (d,  $J = 8.0$  Hz, 2H), 3.84 (q,  $J = 7.2$  Hz, 1H), 3.69 (s, 3H), 3.06 (s, 3H), 1.54 (d,  $J = 7.2$  Hz, 3H);  $^{13}\text{C}$  NMR (101 MHz, Chloroform- $d$ )  $\delta$  174.0, 146.8, 139.4, 128.8, 127.9, 52.5, 45.5, 44.6, 18.5.

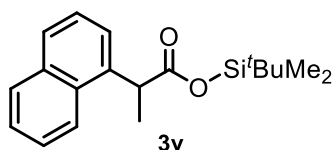

**Tert-butyldimethylsilyl-2-(naphthalen-1-yl)propanoate (3v)**: White solid, 82% yield (51.5 mg), b/l = 97:3,  $^1\text{H}$  NMR (400 MHz, Chloroform- $d$ )  $\delta$  8.11 (d,  $J = 8.4$  Hz, 1H), 7.87 (d,  $J = 8.0$  Hz, 1H), 7.80-7.73 (m, 1H), 7.56-7.48 (m, 2H), 7.45 (d,  $J = 4.8$  Hz, 2H), 4.48 (q,  $J = 7.2$  Hz, 1H), 1.68 (d,  $J = 7.2$  Hz, 3H), 0.66 (s, 9H), 0.19 (s, 3H), 0.15 (s, 3H);  $^{13}\text{C}$  NMR (101 MHz, Chloroform- $d$ )  $\delta$  175.2, 137.4, 134.1, 131.6, 129.0, 127.7, 126.2, 125.6, 125.6, 124.6, 123.6, 43.3, 25.3, 17.9, 17.5, -4.9, -5.1. HRMS calcd. (ESI)  $m/z$  for  $\text{C}_{19}\text{H}_{26}\text{O}_2\text{SiNa}$   $[\text{M}+\text{Na}]^+$ : 337.1594, found: 337.1577.

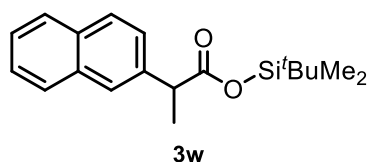

**Tert-butyldimethylsilyl-2-(naphthalen-2-yl)propanoate (3w)**: White solid, 90% yield (56.5 mg), b/l > 99:1,  $^1\text{H}$  NMR (400 MHz, Chloroform- $d$ )  $\delta$  7.79 (d,  $J = 8.0$  Hz, 3H), 7.73 (s, 1H), 7.48-7.42 (m, 3H), 3.86 (q,  $J = 7.2$  Hz, 1H), 1.58 (d,  $J = 7.2$  Hz, 3H),



0.81 (s, 9H), 0.22 (s, 3H), 0.17 (s, 3H);  $^{13}\text{C}$  NMR (101 MHz, Chloroform-*d*)  $\delta$  174.8, 138.5, 133.6, 132.6, 128.3, 127.9, 127.7, 126.3, 126.2, 126.1, 125.8, 47.4, 25.5, 18.4, 17.7, -4.8, -5.0. HRMS calcd. (ESI)  $m/z$  for  $\text{C}_{19}\text{H}_{26}\text{O}_2\text{SiNa}$   $[\text{M}+\text{Na}]^+$ : 337.1594, found: 337.1561.

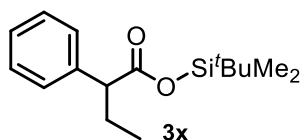

**Tert-butyldimethylsilyl-2-phenylbutanoate (3x):** Colorless oil, 38% yield (21.1 mg),  $b/l > 99:1$ ,  $^1\text{H}$  NMR (400 MHz, Chloroform-*d*)  $\delta$  7.33-7.27 (m, 4H), 7.25-7.19 (m, 1H), 3.42 (t,  $J = 7.6$  Hz, 1H), 2.16-2.02 (m, 1H), 1.86-1.72 (m, 1H), 0.91 (d,  $J = 6.0$  Hz, 3H), 0.84 (s, 9H), 0.21 (s, 3H), 0.18 (s, 3H);  $^{13}\text{C}$  NMR (101 MHz, Chloroform-*d*)  $\delta$  174.3, 139.6, 128.5, 128.1, 127.1, 55.4, 26.4, 25.5, 17.7, 12.3, -4.8, -5.0. HRMS calcd. (ESI)  $m/z$  for  $\text{C}_{16}\text{H}_{26}\text{O}_2\text{SiNa}$   $[\text{M}+\text{Na}]^+$ : 301.1594, found: 301.1576.

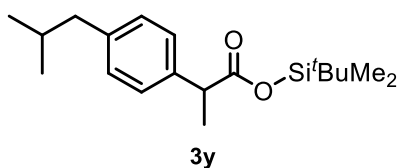

**Tert-butyldimethylsilyl-2-(4-isobutylphenyl)propanoate (3y):** Colorless oil, 85% yield (54.4 mg),  $b/l > 99:1$ ,  $^1\text{H}$  NMR (400 MHz, Chloroform-*d*)  $\delta$  7.18 (d,  $J = 8.0$  Hz, 2H), 7.08 (d,  $J = 8.0$  Hz, 2H), 3.65 (q,  $J = 7.2$  Hz, 1H), 2.44 (d,  $J = 7.2$  Hz, 2H), 1.90-1.77 (m, 1H), 1.47 (d,  $J = 7.2$  Hz, 3H), 0.88 (d,  $J = 6.4$  Hz, 6H), 0.79 (s, 9H), 0.20 (s, 3H), 0.16 (s, 3H);  $^{13}\text{C}$  NMR (101 MHz, Chloroform-*d*)  $\delta$  175.1, 140.5, 138.3, 129.3, 127.4, 46.9, 45.2, 30.4, 25.5, 22.4, 18.2, 17.7, -4.8, -5.0. HRMS calcd. (ESI)  $m/z$  for  $\text{C}_{19}\text{H}_{32}\text{O}_2\text{SiNa}$   $[\text{M}+\text{Na}]^+$ : 343.2063, found: 343.2067.

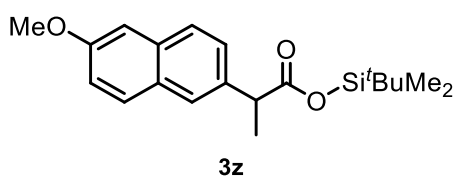

**Tert-butyldimethylsilyl-2-(6-methoxynaphthalen-2-yl)propanoate (3z):** White solid, 78% yield (53.7 mg),  $b/l > 99:1$ ,  $^1\text{H}$  NMR (400 MHz, Chloroform-*d*)  $\delta$  7.72-7.66 (m, 3H), 7.42 (d,  $J = 8.4$  Hz, 1H), 7.16-7.10 (m, 2H), 3.90 (s, 3H), 3.84 (q,  $J = 6.8$  Hz,

1H), 1.58 (d,  $J = 6.8$  Hz, 3H), 0.83 (s, 9H), 0.24 (s, 3H), 0.18 (s, 3H);  $^{13}\text{C}$  NMR (101 MHz, Chloroform- $d$ )  $\delta$  175.0, 157.6, 136.1, 133.7, 129.3, 129.0, 127.1, 126.5, 126.1, 119.0, 105.6, 55.3, 47.2, 25.5, 18.4, 17.7, -4.8, -5.0. HRMS calcd. (ESI)  $m/z$  for  $\text{C}_{20}\text{H}_{28}\text{O}_3\text{SiNa}$   $[\text{M}+\text{Na}]^+$ : 367.1699, found: 367.1713.

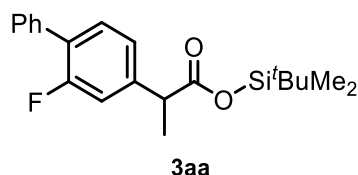

***Tert*-butyldimethylsilyl-2-(2-fluoro-[1,1'-biphenyl]-4-yl)propanoate (3aa):**

White solid, 75% yield (53.7 mg),  $b/l > 99:1$ ,  $^1\text{H}$  NMR (400 MHz, Chloroform- $d$ )  $\delta$  7.53 (d,  $J = 7.6$  Hz, 2H), 7.45-7.41 (m, 2H), 7.40-7.32 (m, 2H), 7.16-7.08 (m, 2H), 3.73 (q,  $J = 7.2$  Hz, 1H), 1.52 (d,  $J = 7.2$  Hz, 3H), 0.85 (s, 9H), 0.25 (s, 3H), 0.21 (s, 3H);  $^{13}\text{C}$  NMR (101 MHz, Chloroform- $d$ )  $\delta$  174.3, 161.0, 158.5, 142.4 (d,  $J = 8.0$  Hz), 135.7, 130.8 (d,  $J = 4.0$  Hz), 129.1 (d,  $J = 3.0$  Hz), 128.6, 127.7, 123.8 (d,  $J = 3.5$  Hz), 115.4 (d,  $J = 23.3$  Hz), 46.8, 25.5, 18.2, 17.7, -4.8, -5.0. HRMS calcd. (ESI)  $m/z$  for  $\text{C}_{21}\text{H}_{27}\text{FO}_2\text{SiNa}$   $[\text{M}+\text{Na}]^+$ : 381.1656, found: 381.1634.

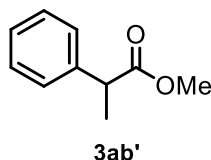

**Methyl 2-phenylpropanoate (3ab')**: Colorless oil, 90% yield (29.5 mg),  $b/l > 99:1$ ,  $^1\text{H}$  NMR (400 MHz, Chloroform- $d$ )  $\delta$  7.35-7.27 (m, 4H), 7.24 (m,  $J = 8.6, 5.2, 2.0$  Hz, 1H), 3.72 (q,  $J = 7.2$  Hz, 1H), 3.64 (s, 3H), 1.50 (d,  $J = 7.2$  Hz, 3H);  $^{13}\text{C}$  NMR (101 MHz, Chloroform- $d$ )  $\delta$  175.2, 140.7, 128.8, 127.6, 127.3, 52.2, 45.5, 18.7.

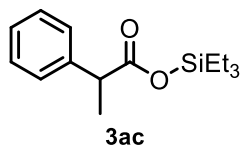

**Triethylsilyl-2-phenylpropanoate (3ac)**: Colorless oil, 86% yield (45.4 mg),  $b/l > 99:1$ ,  $^1\text{H}$  NMR (400 MHz, Chloroform- $d$ )  $\delta$  7.29 (d,  $J = 4.4$  Hz, 4H), 7.25-7.18 (m, 1H), 3.70 (q,  $J = 7.2$  Hz, 1H), 1.49 (d,  $J = 7.2$  Hz, 3H), 0.87 (t,  $J = 8.0$  Hz, 9H), 0.69 (q,  $J = 8.0$  Hz, 6H);  $^{13}\text{C}$  NMR (101 MHz, Chloroform- $d$ )  $\delta$  175.0, 141.0, 128.5, 127.6, 127.0,

47.1, 18.3, 6.4, 4.5. HRMS calcd. (ESI)  $m/z$  for  $C_{15}H_{24}O_2SiNa$   $[M+Na]^+$ : 287.1437, found: 287.1423.

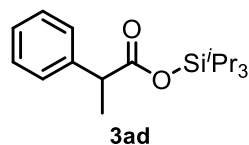

**Triisopropylsilyl-2-phenylpropanoate (3ad):** Colorless oil, 76% yield (46.5 mg),  $b/l > 99:1$ ,  $^1H$  NMR (400 MHz, Chloroform-*d*)  $\delta$  7.36-7.27 (m, 4H), 7.26-7.20 (m, 1H), 3.73 (q,  $J = 7.6$  Hz, 1H), 1.52 (d,  $J = 7.2$  Hz, 3H), 1.27-1.18 (m, 3H), 0.97 (dd,  $J = 8.0, 4.8$  Hz, 18H);  $^{13}C$  NMR (101 MHz, Chloroform-*d*)  $\delta$  174.5, 141.0, 128.5, 127.8, 127.1, 47.3, 18.1, 17.7, 12.0. HRMS calcd. (ESI)  $m/z$  for  $C_{18}H_{30}O_2SiNa$   $[M+Na]^+$ : 287.1437, found: 287.1438.

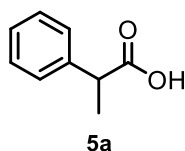

**2-phenylpropanoic acid (5a):** Colorless oil, 93% yield (27.9 mg),  $^1H$  NMR (400 MHz, Chloroform-*d*)  $\delta$  11.92 (s, 1H), 7.31 (d,  $J = 4.4$  Hz, 4H), 7.28-7.23 (m, 1H), 3.72 (q,  $J = 7.2$  Hz, 1H), 1.49 (d,  $J = 7.2$  Hz, 3H);  $^{13}C$  NMR (101 MHz, Chloroform-*d*)  $\delta$  181.4, 139.8, 128.8, 127.7, 127.5, 45.5, 18.2.

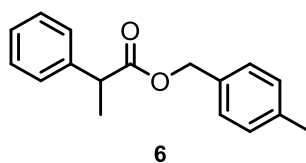

**4-methylbenzyl 2-phenylpropanoate (6):** Colorless oil, 84% yield (42.7 mg),  $b/l > 99:1$ ,  $^1H$  NMR (400 MHz, Chloroform-*d*)  $\delta$  7.32-7.20 (m, 5H), 7.15-7.08 (m, 4H), 5.11-4.99 (m, 2H), 3.75 (q,  $J = 7.2$  Hz, 1H), 2.31 (s, 3H), 1.50 (d,  $J = 7.2$  Hz, 3H);  $^{13}C$  NMR (101 MHz, Chloroform-*d*)  $\delta$  174.5, 140.5, 138.0, 133.1, 129.2, 128.7, 128.1, 127.6, 127.2, 66.5, 45.6, 21.3, 18.6. HRMS calcd. (ESI)  $m/z$  for  $C_{17}H_{18}O_2Na$   $[M+Na]^+$ : 277.1199, found: 277.1174.

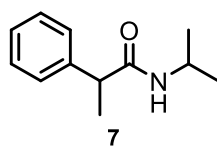

**N-isopropyl-2-phenylpropanamide (7):** Colorless oil, 67% yield (25.6 mg), b/l > 99:1,  $^1\text{H}$  NMR (400 MHz, Chloroform-*d*)  $\delta$  7.38-7.31 (m, 2H), 7.28 (dd,  $J = 7.2, 3.8$  Hz, 3H), 5.17 (s, 1H), 4.03 (dp,  $J = 13.2, 6.4$  Hz, 1H), 3.50 (q,  $J = 7.2$  Hz, 1H), 1.50 (d,  $J = 7.2$  Hz, 3H), 1.05 (dd,  $J = 20.4, 6.6$  Hz, 6H);  $^{13}\text{C}$  NMR (101 MHz, Chloroform-*d*)  $\delta$  173.3, 141.7, 129.0, 127.7, 127.2, 47.3, 41.5, 22.7, 22.6, 18.8. HRMS calcd. (ESI)  $m/z$  for  $\text{C}_{12}\text{H}_{17}\text{NONa}$   $[\text{M}+\text{Na}]^+$ : 214.1202, found: 214.1184.

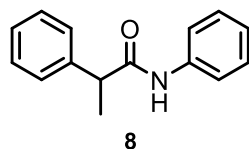

**N,2-diphenylpropanamide (8):** Colorless oil, 86% yield (38.7 mg), b/l > 99:1,  $^1\text{H}$  NMR (400 MHz, Chloroform-*d*)  $\delta$  7.44-7.23 (m, 9H), 7.07 (dd,  $J = 17.0, 9.6$  Hz, 2H), 3.72 (q,  $J = 7.2$  Hz, 1H), 1.59 (d,  $J = 7.6$  Hz, 3H);  $^{13}\text{C}$  NMR (101 MHz, Chloroform-*d*)  $\delta$  172.4, 141.0, 138.0, 129.3, 129.0, 127.8, 127.7, 124.4, 119.8, 48.2, 18.7. HRMS calcd. (ESI)  $m/z$  for  $\text{C}_{15}\text{H}_{15}\text{NONa}$   $[\text{M}+\text{Na}]^+$ : 248.1045, found: 248.1039.

## 6. Copies of $^1\text{H}$ and $^{13}\text{C}$ NMR Spectra.

$^1\text{H}$  NMR Spectra (400 MHz,  $\text{CDCl}_3$ ) of **3a**

7.319  
7.298  
7.282  
7.266  
7.240  
7.234  
7.226  
7.218  
7.210  
7.203  
7.197

3.710  
3.692  
3.674  
3.656

1.491  
1.473

-0.807

-0.212  
-0.166  
-0.002

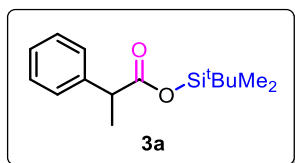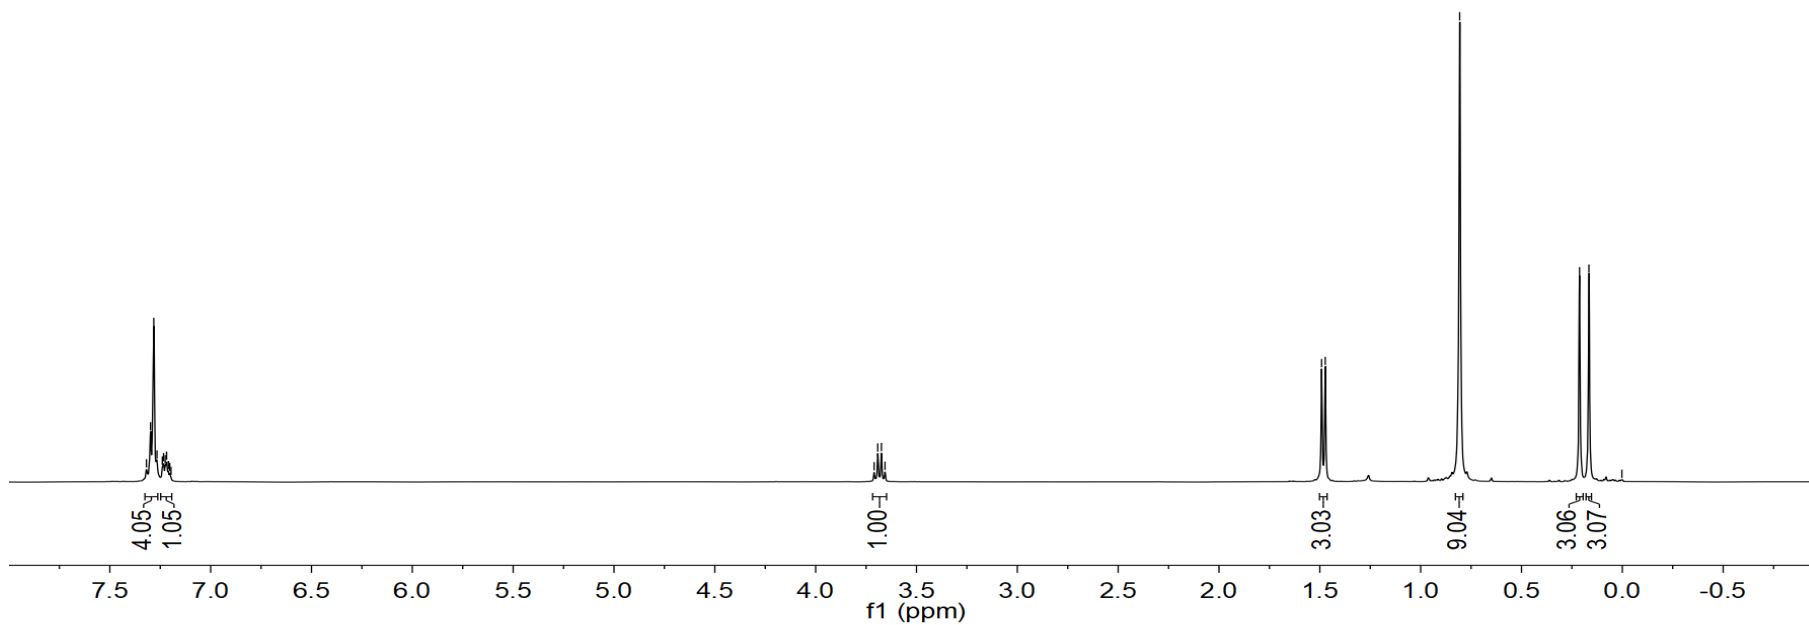

<sup>13</sup>C NMR Spectra (101 MHz, CDCl<sub>3</sub>) of **3a**

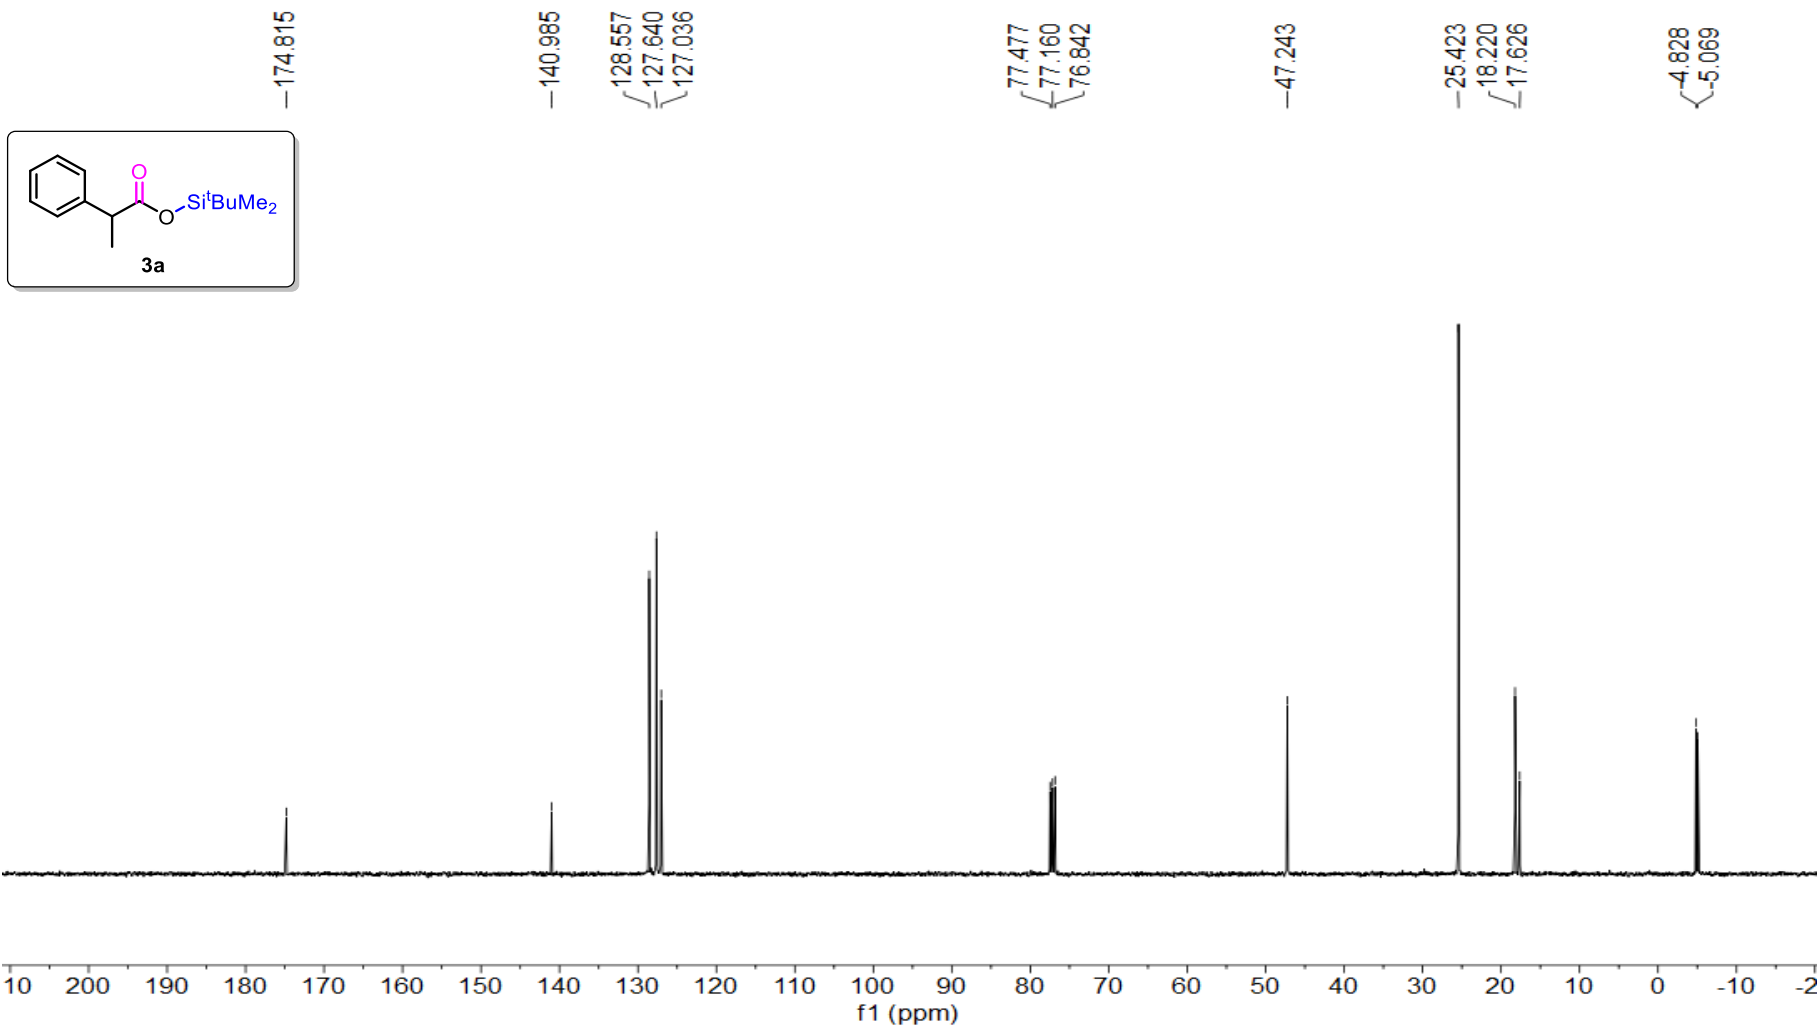

<sup>1</sup>H NMR Spectra (400 MHz, CDCl<sub>3</sub>) of **3b**

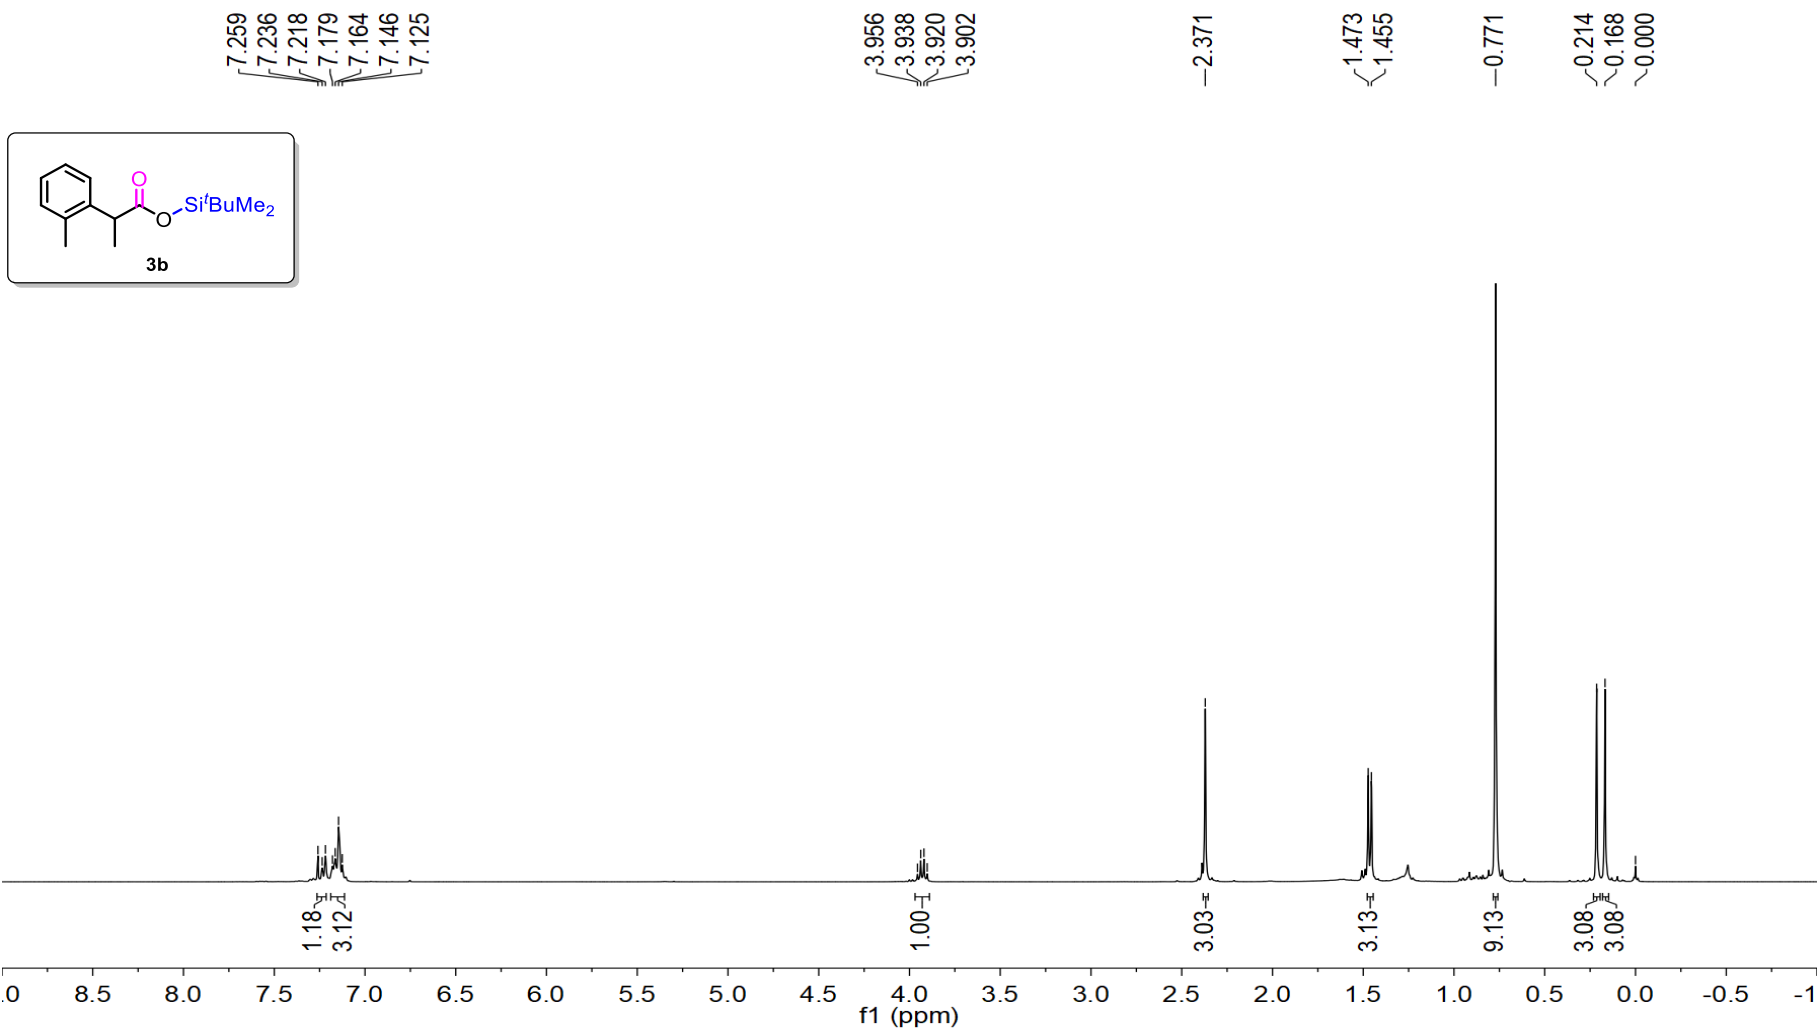

<sup>13</sup>C NMR Spectra (101 MHz, CDCl<sub>3</sub>) of **3b**

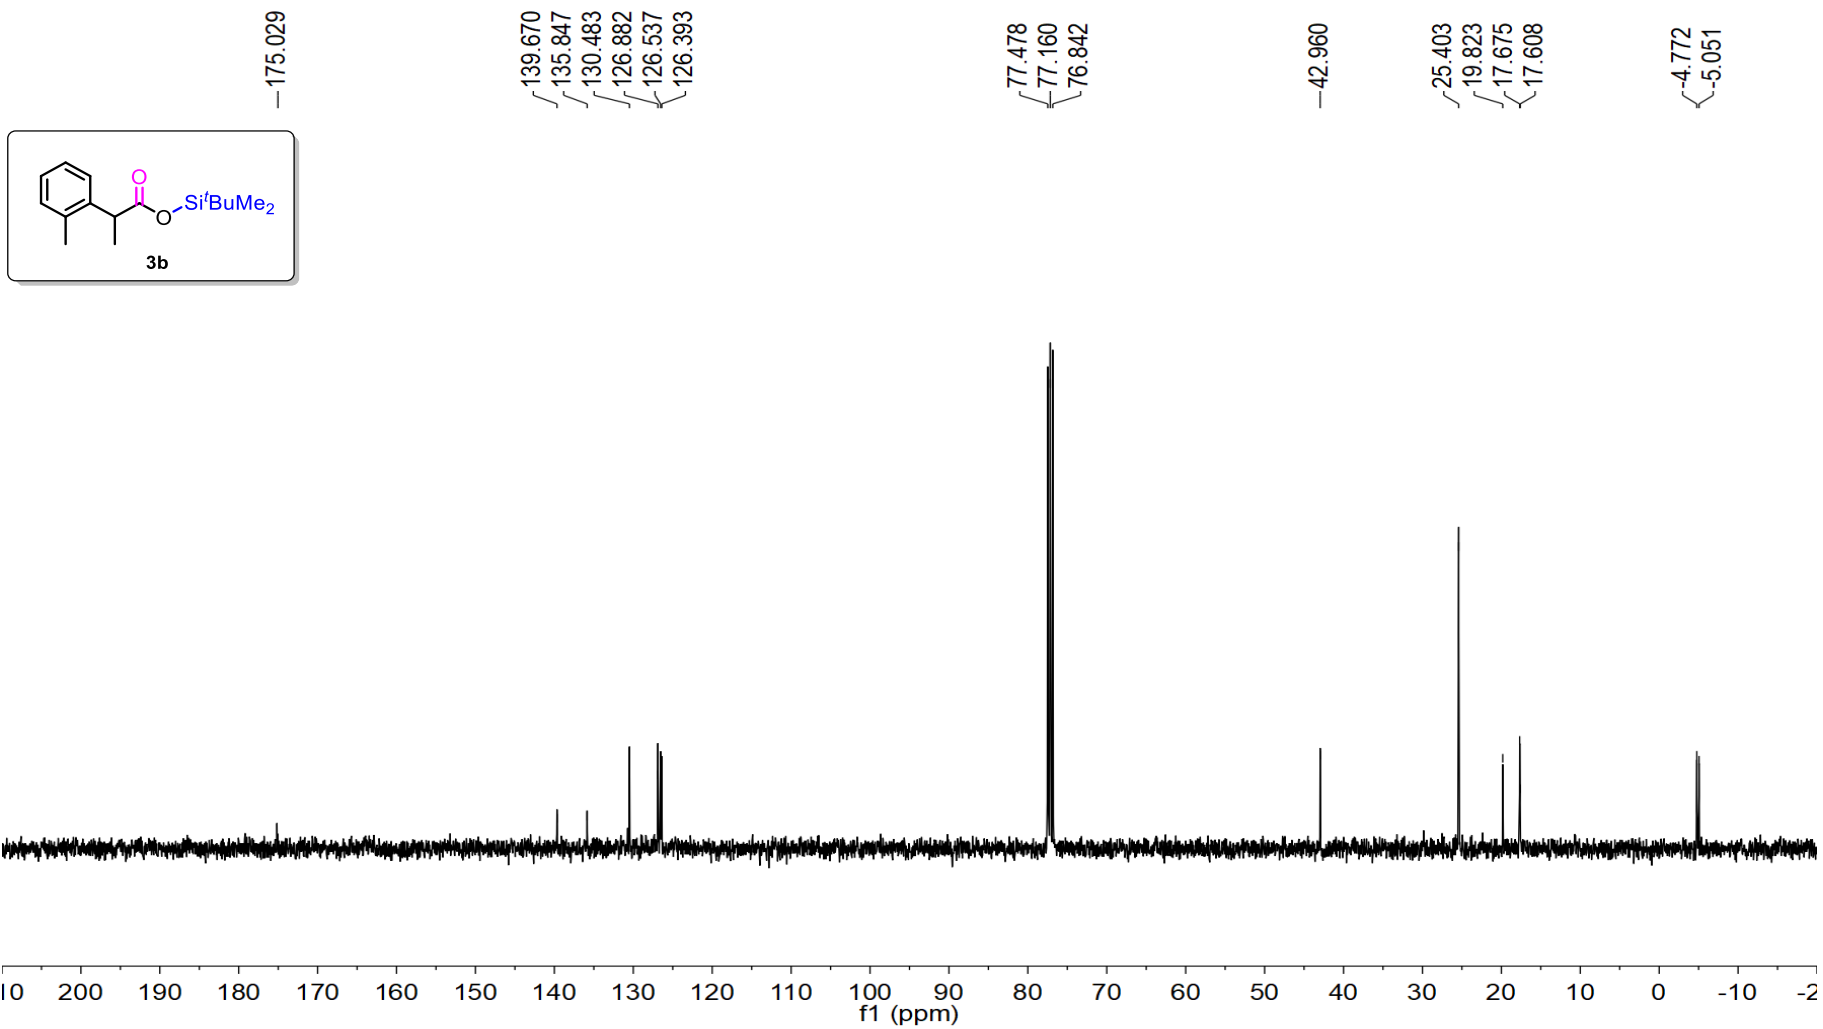



<sup>1</sup>H NMR Spectra (400 MHz, CDCl<sub>3</sub>) of **3c**

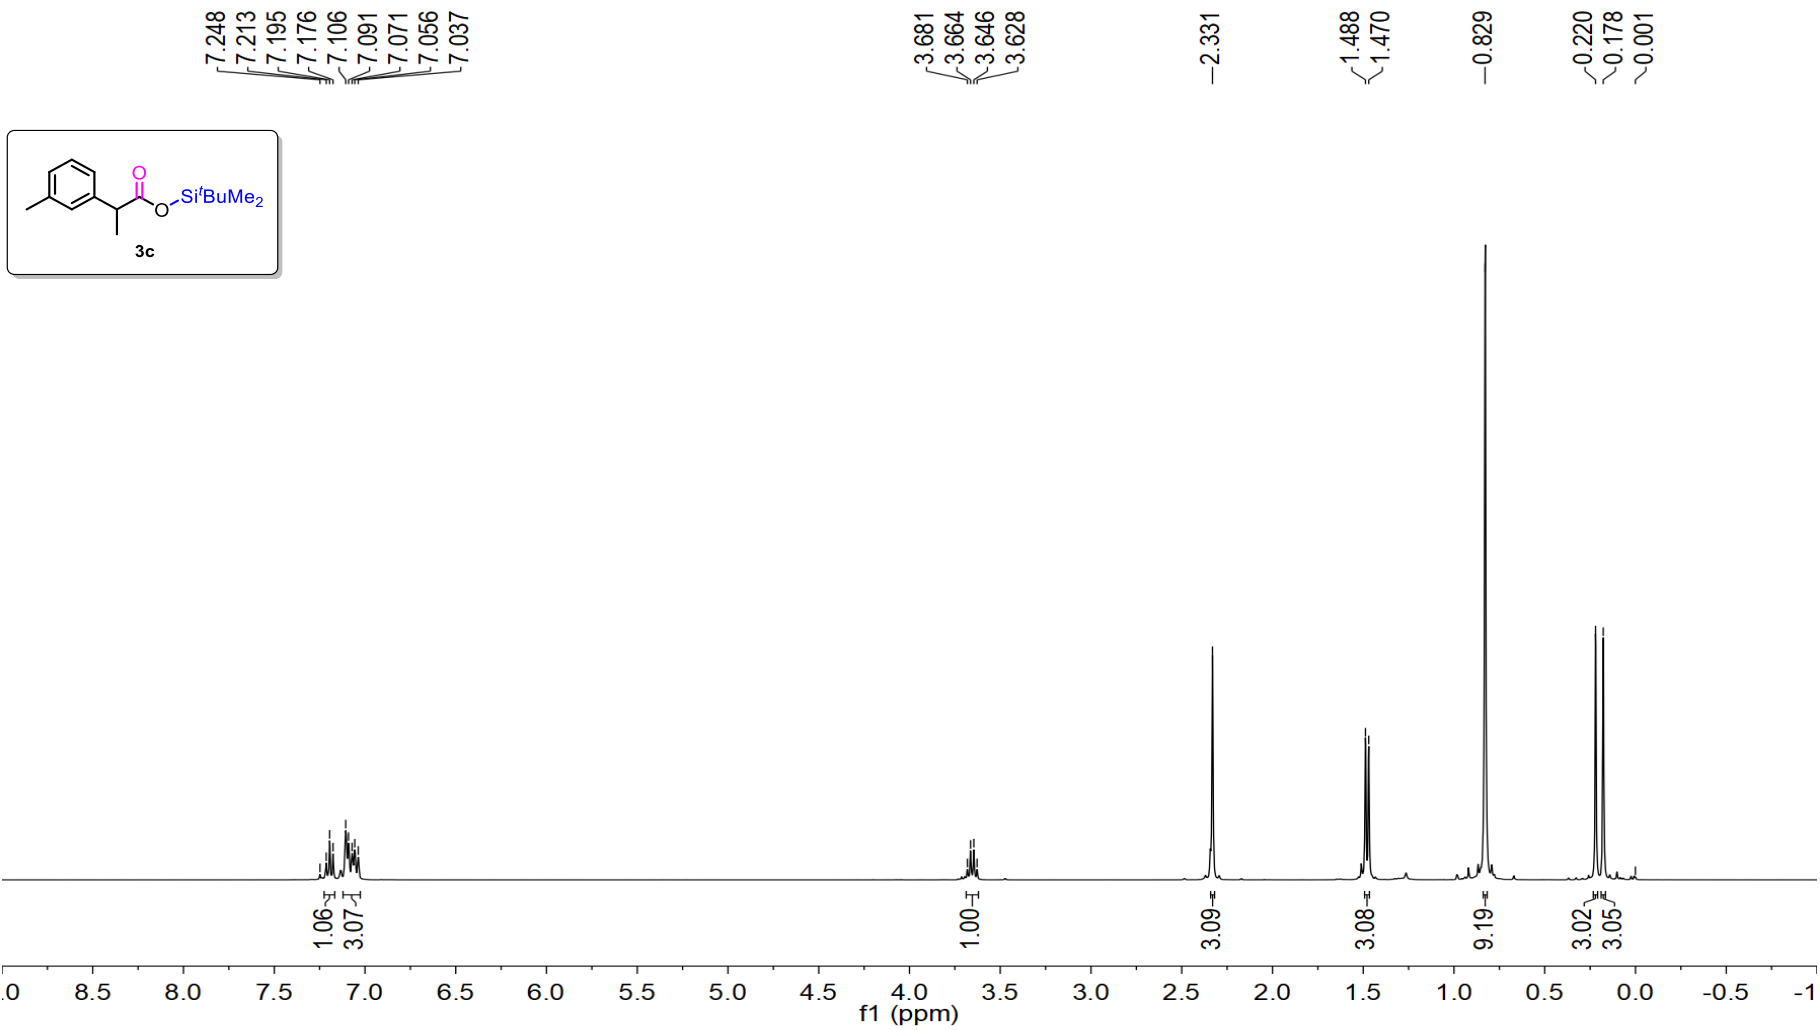

<sup>13</sup>C NMR Spectra (101 MHz, CDCl<sub>3</sub>) of **3c**

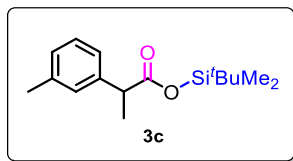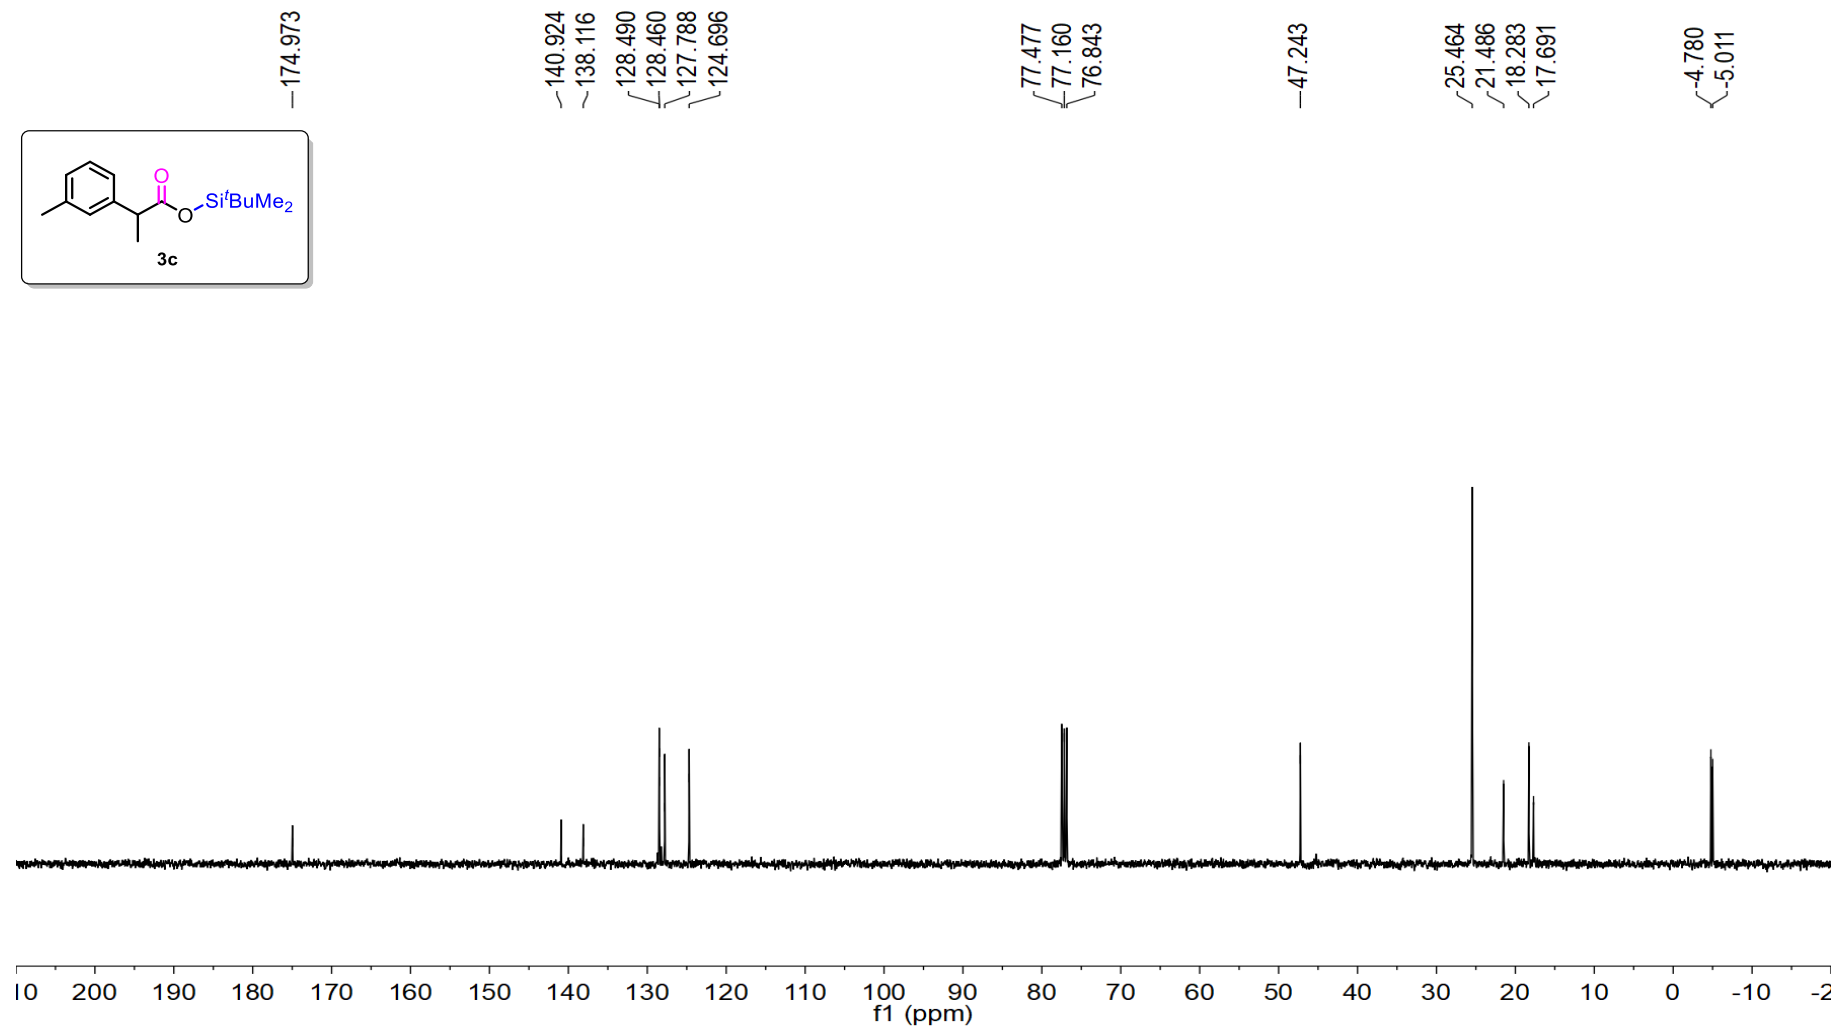

$^1\text{H}$  NMR Spectra (400 MHz,  $\text{CDCl}_3$ ) of **3d**

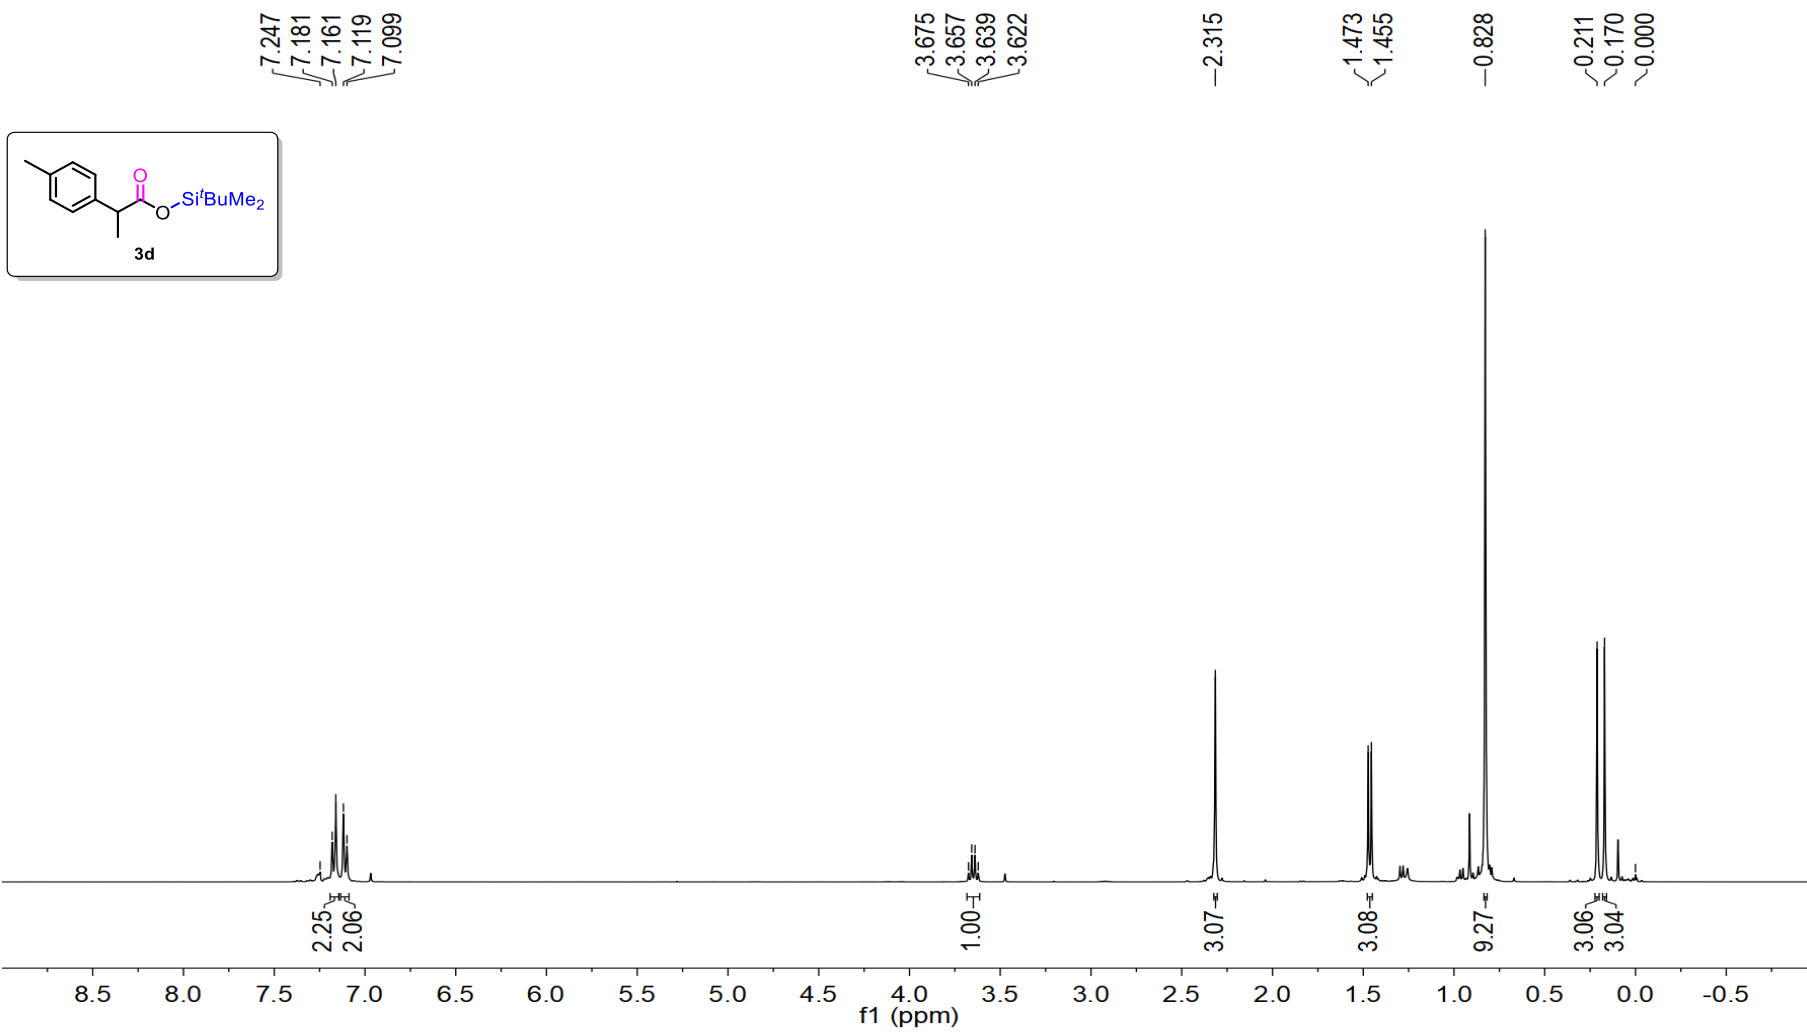

$^{13}\text{C}$  NMR Spectra (101 MHz,  $\text{CDCl}_3$ ) of **3d**

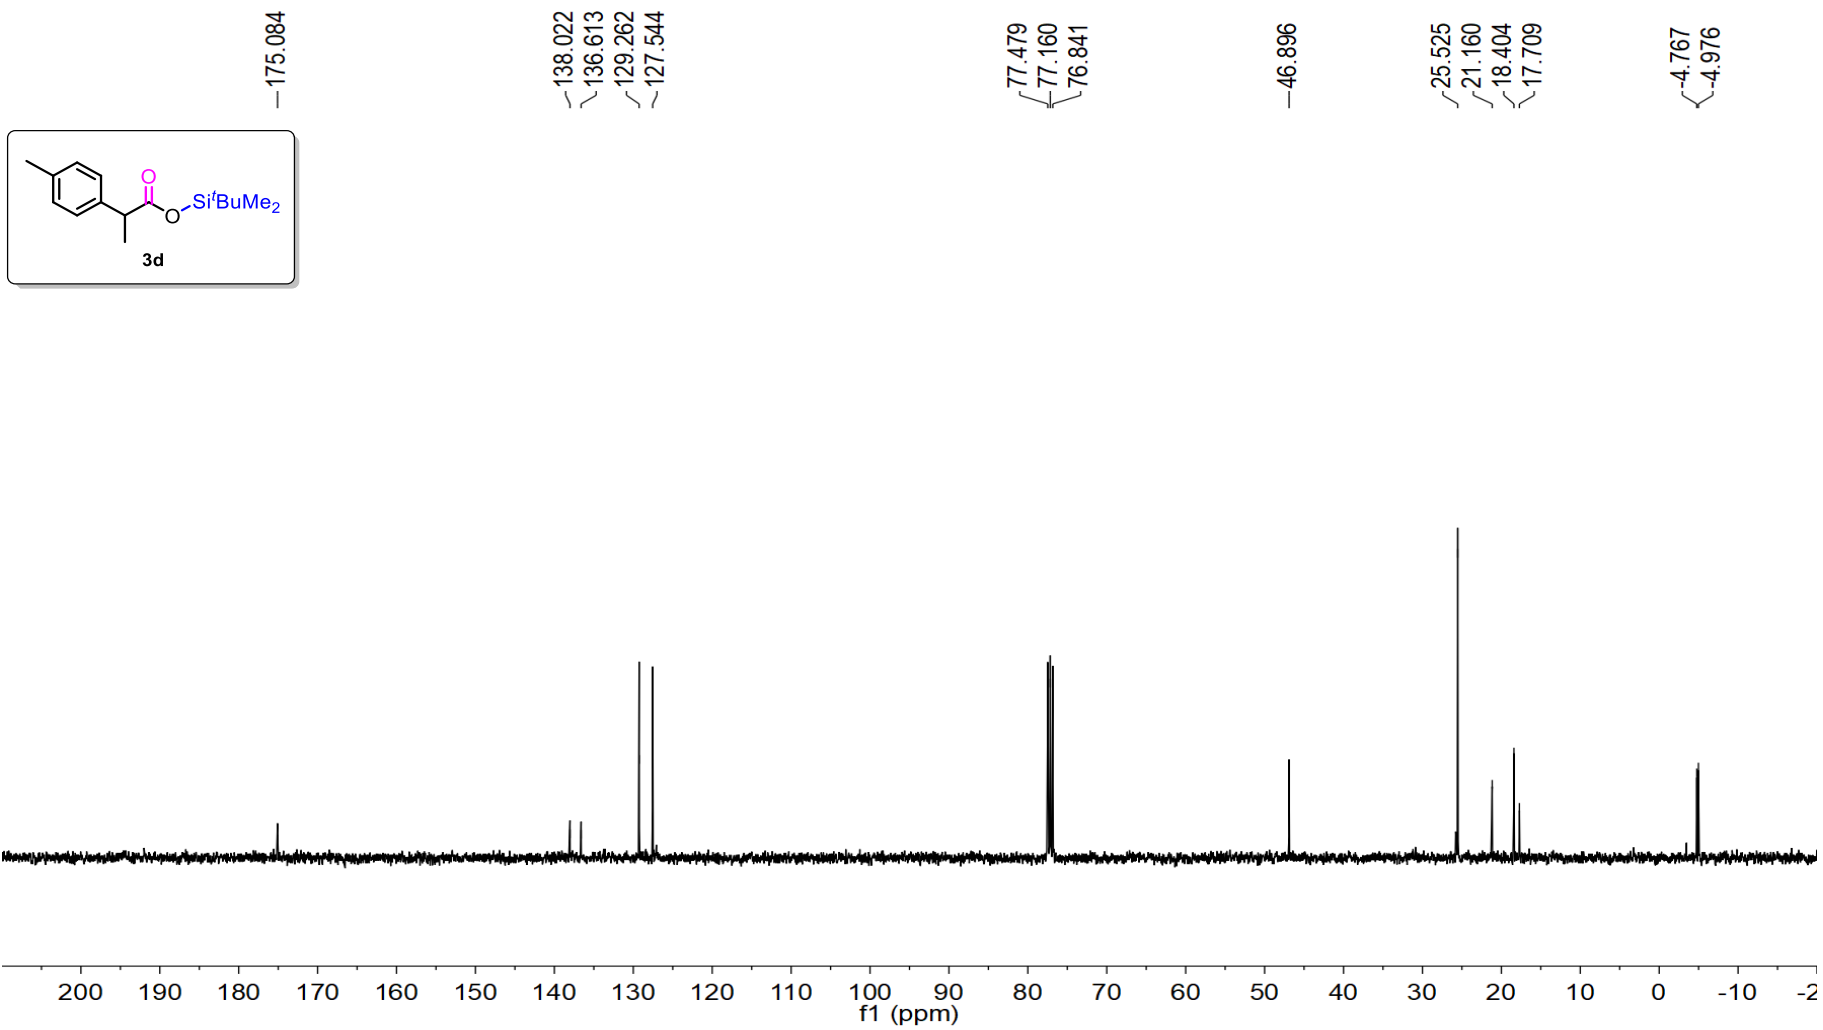

<sup>1</sup>H NMR Spectra (400 MHz, CDCl<sub>3</sub>) of **3e**

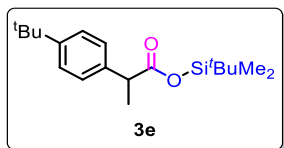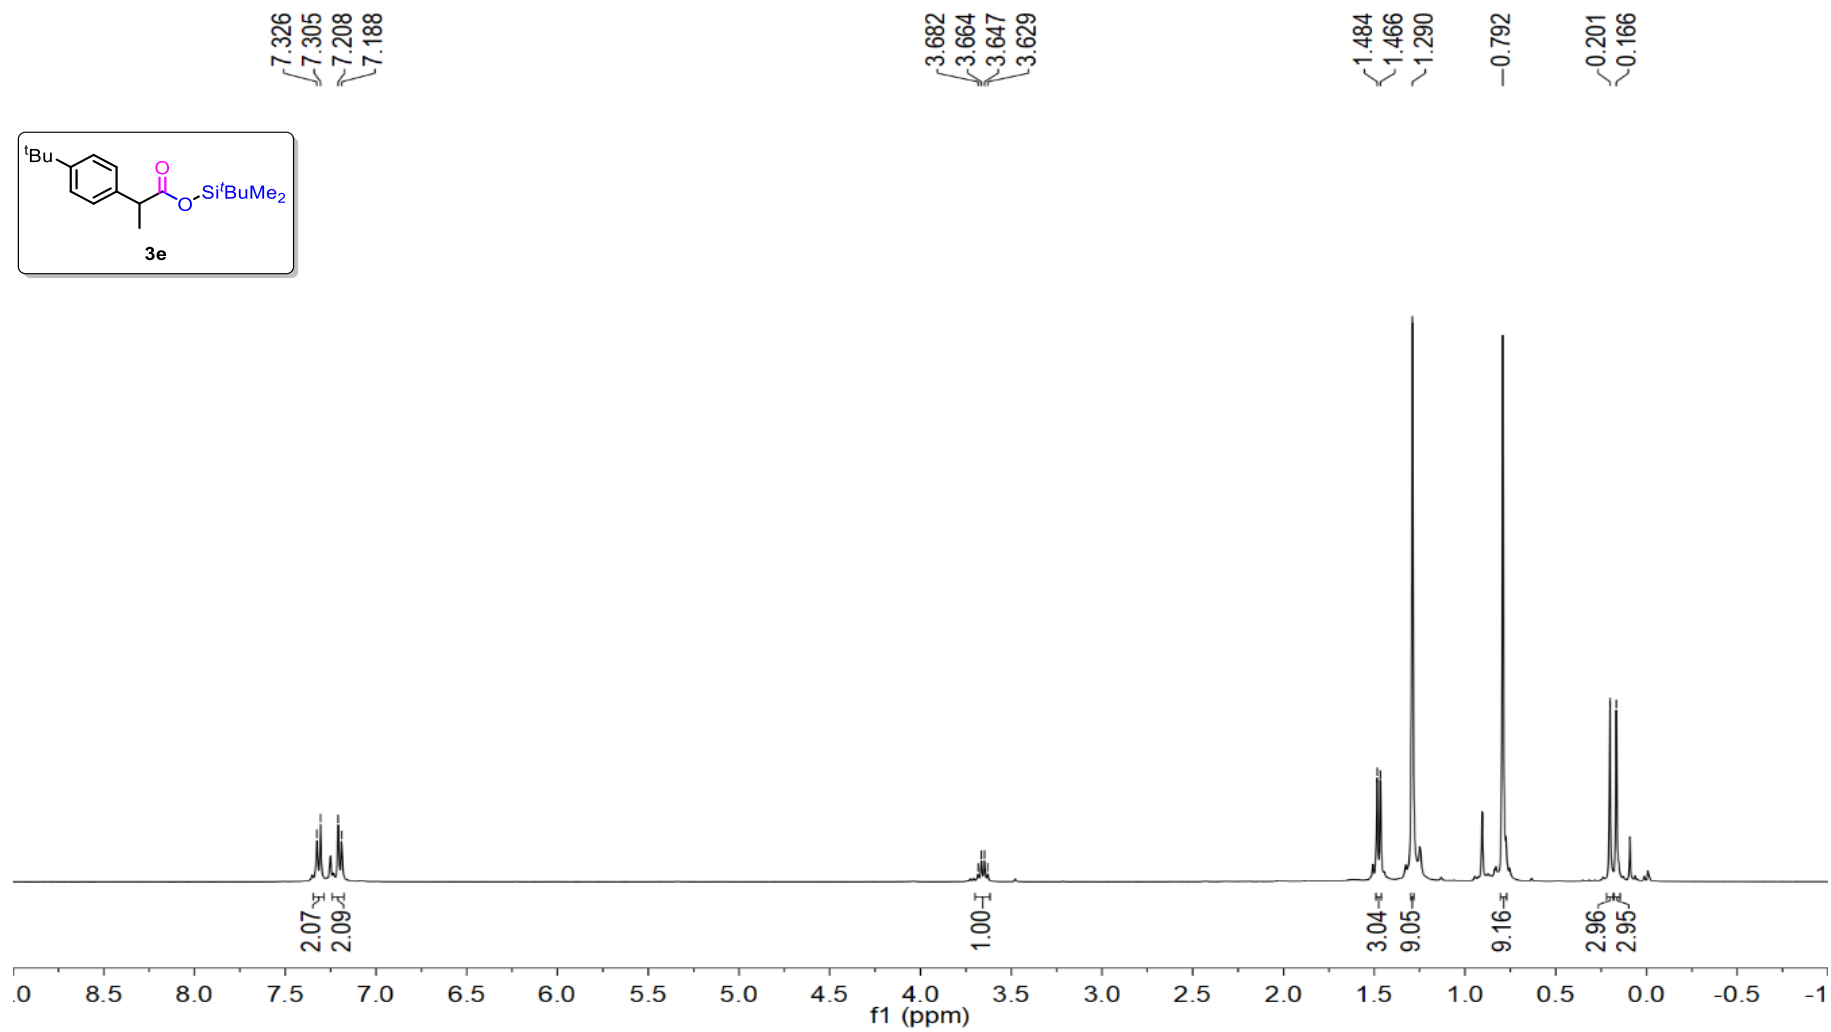

<sup>13</sup>C NMR Spectra (101 MHz, CDCl<sub>3</sub>) of **3e**

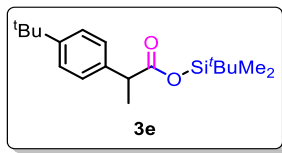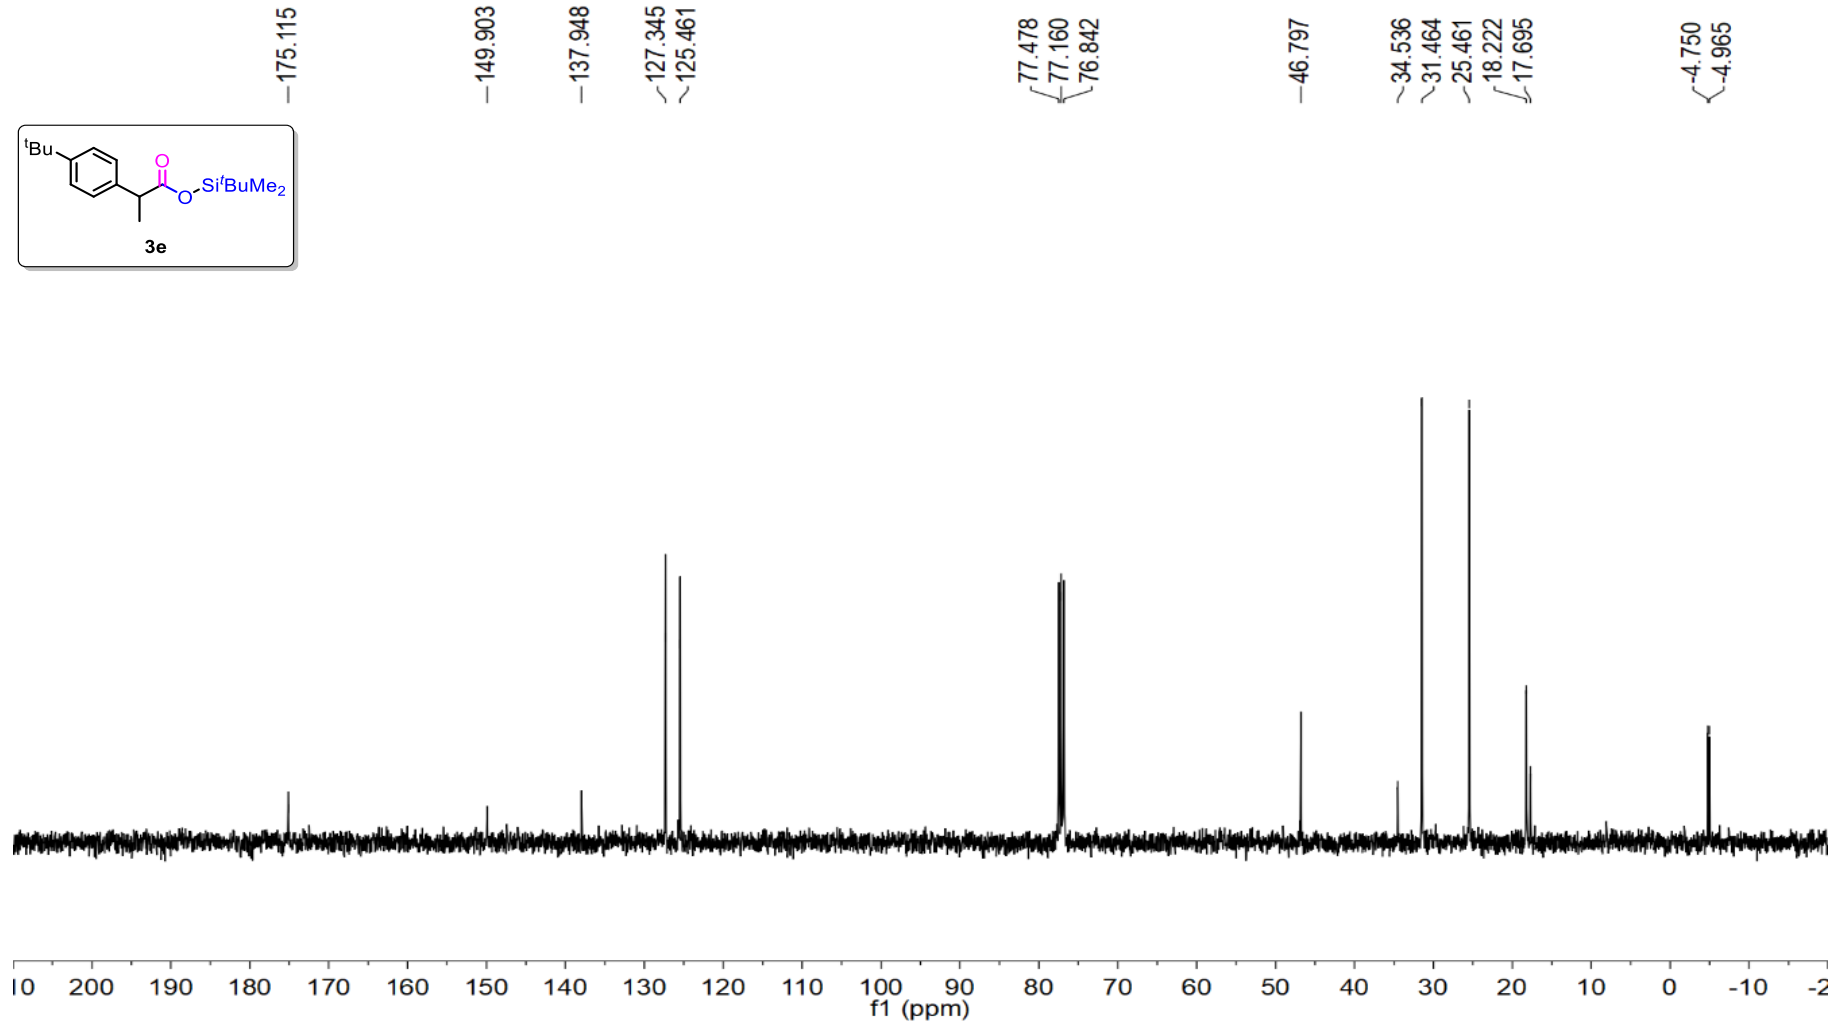

<sup>1</sup>H NMR Spectra (400 MHz, CDCl<sub>3</sub>) of **3f**

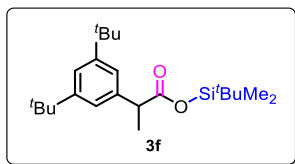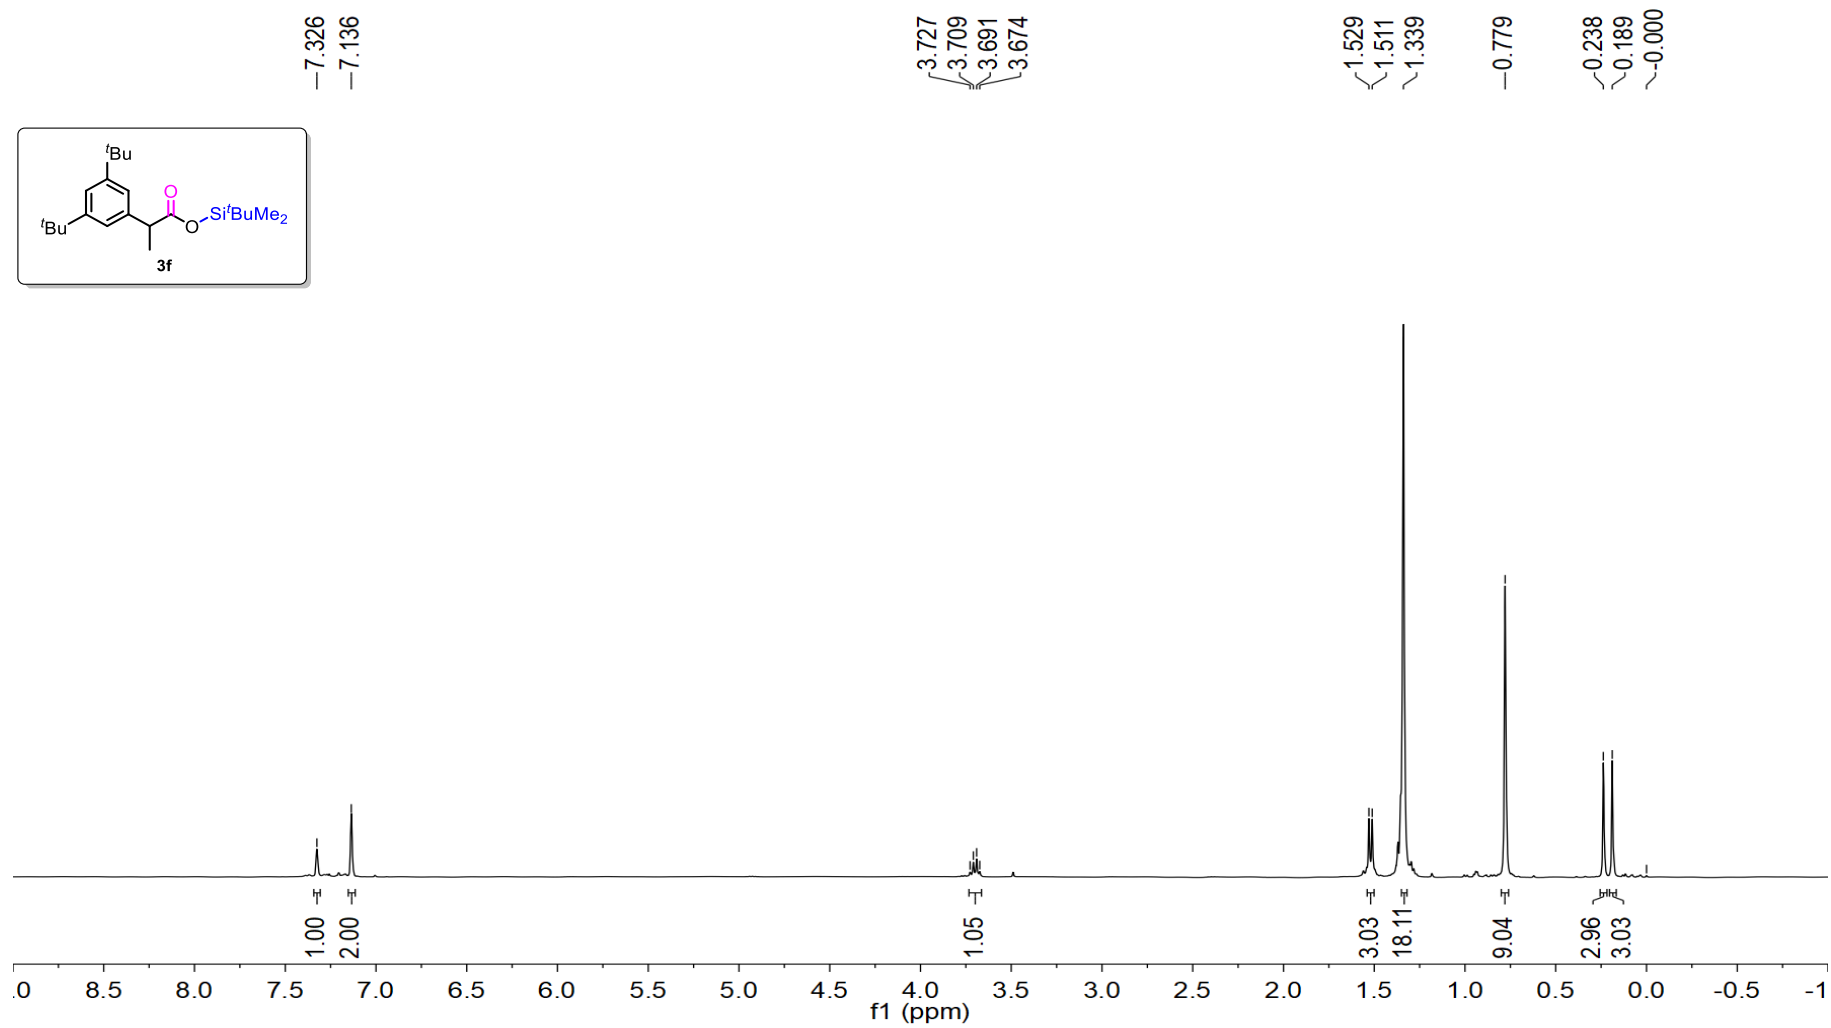

$^{13}\text{C}$  NMR Spectra (101 MHz,  $\text{CDCl}_3$ ) of **3f**

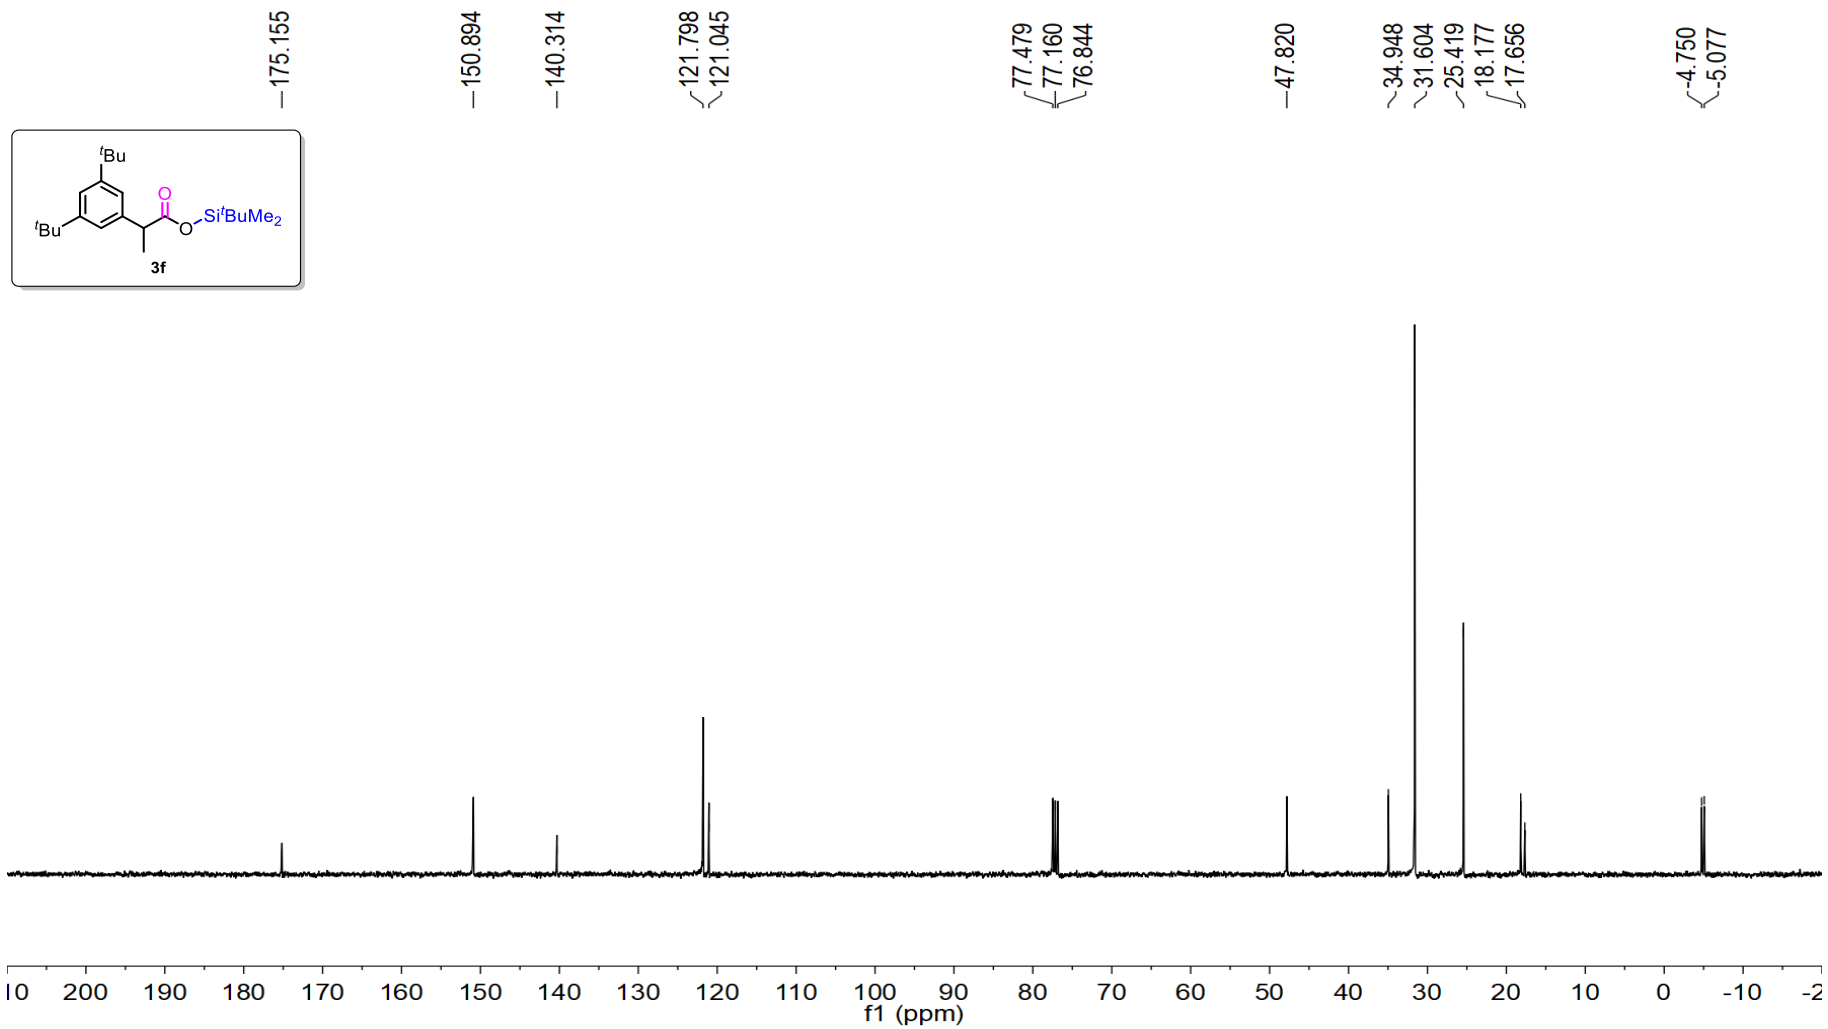



<sup>1</sup>H NMR Spectra (400 MHz, CDCl<sub>3</sub>) of **3g**

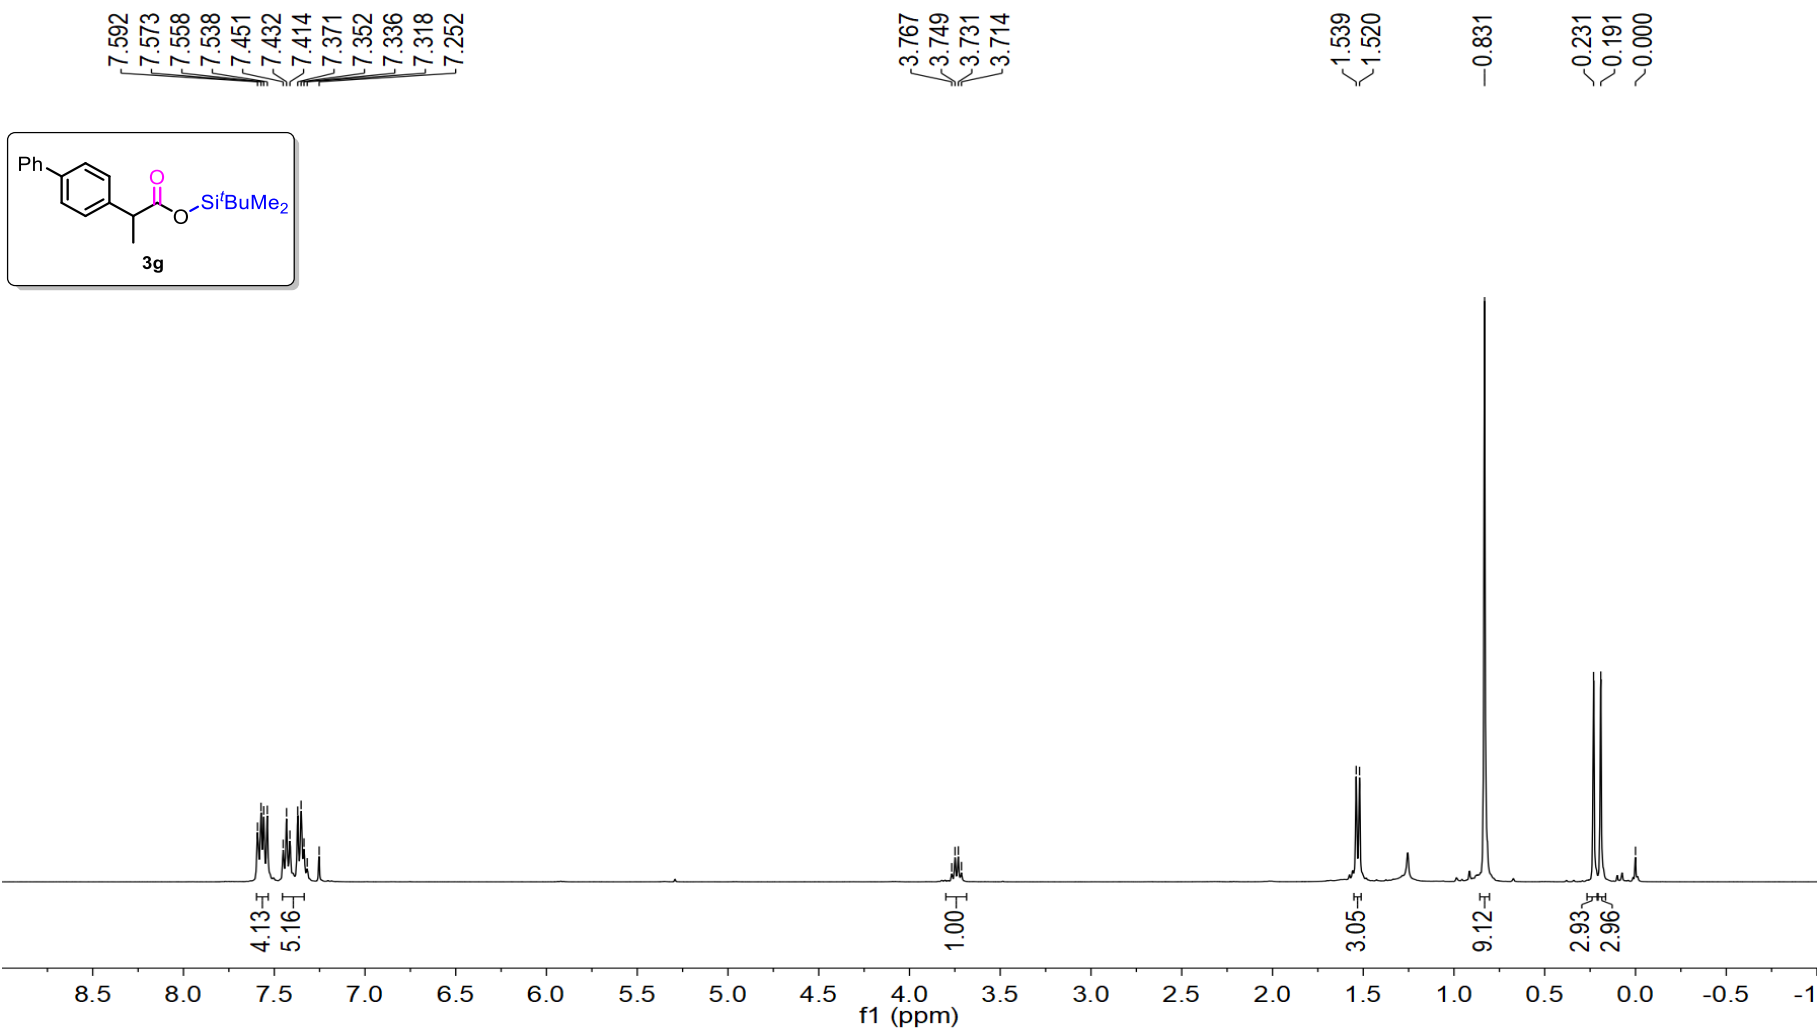

<sup>13</sup>C NMR Spectra (101 MHz, CDCl<sub>3</sub>) of **3g**

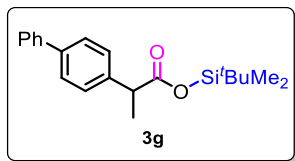

174.862

145.431

140.997

140.098

140.011

128.889

128.146

127.341

127.185

77.478

77.161

76.841

46.989

25.513

18.315

17.730

4.745

4.949

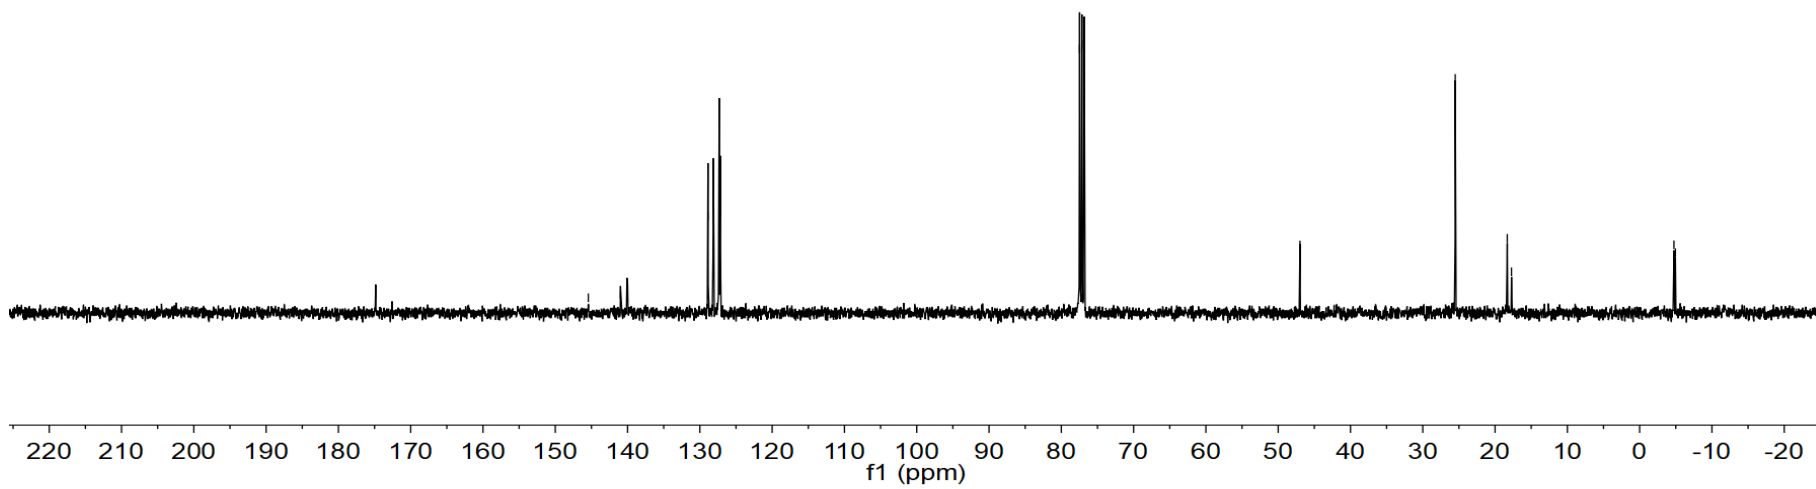

<sup>1</sup>H NMR Spectra (400 MHz, CDCl<sub>3</sub>) of **3h**

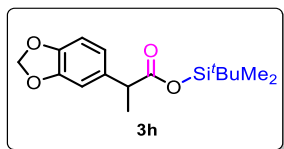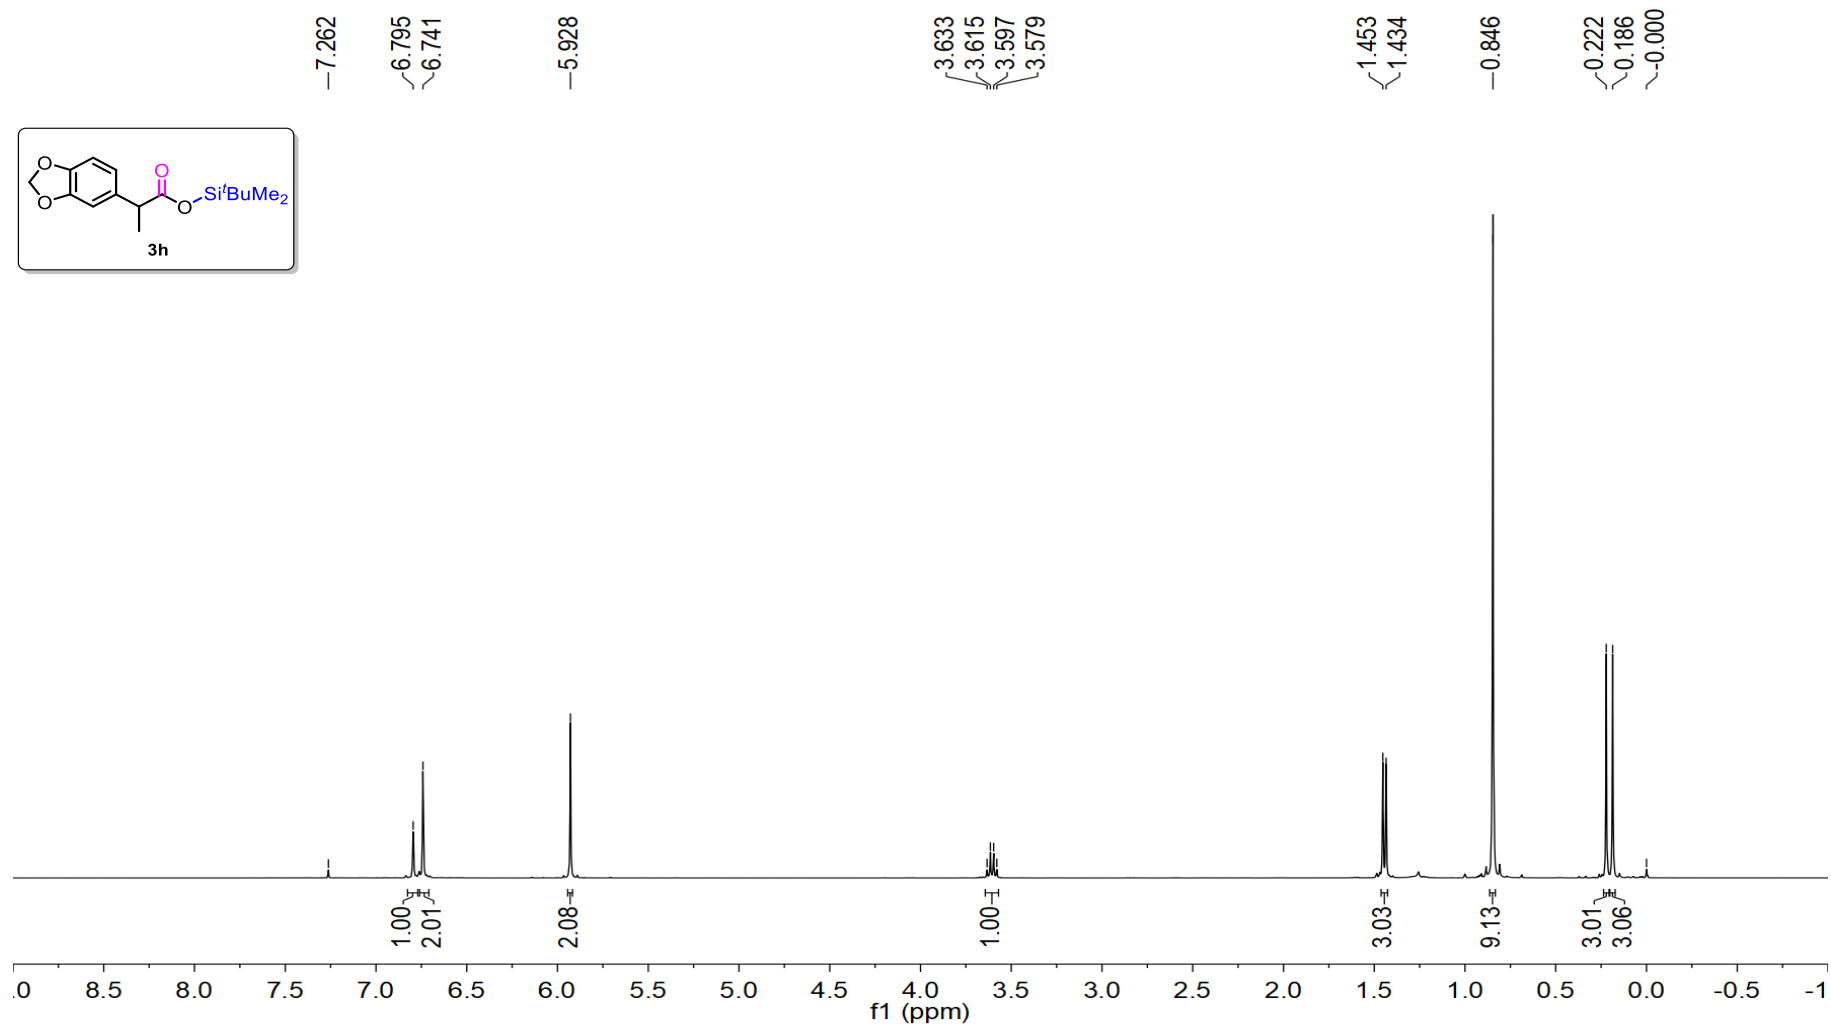

<sup>13</sup>C NMR Spectra (101 MHz, CDCl<sub>3</sub>) of **3h**

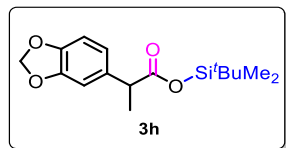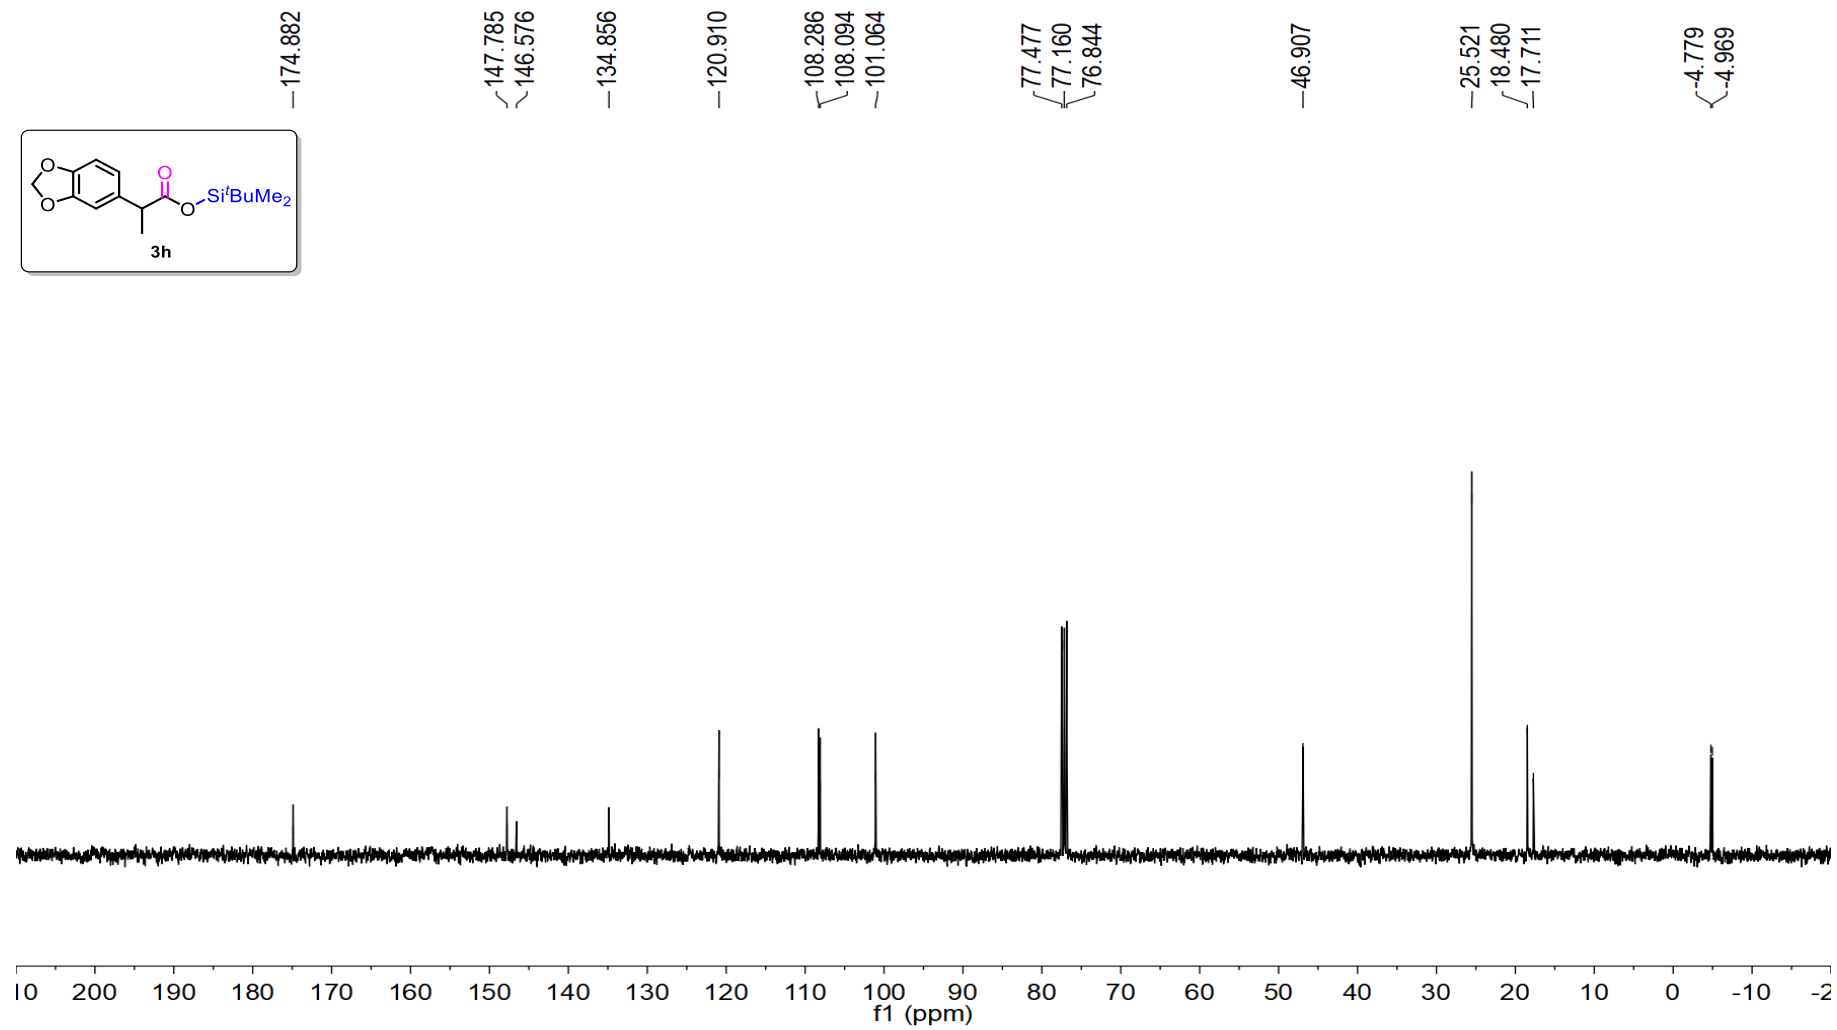

<sup>1</sup>H NMR Spectra (400 MHz, CDCl<sub>3</sub>) of **3i**

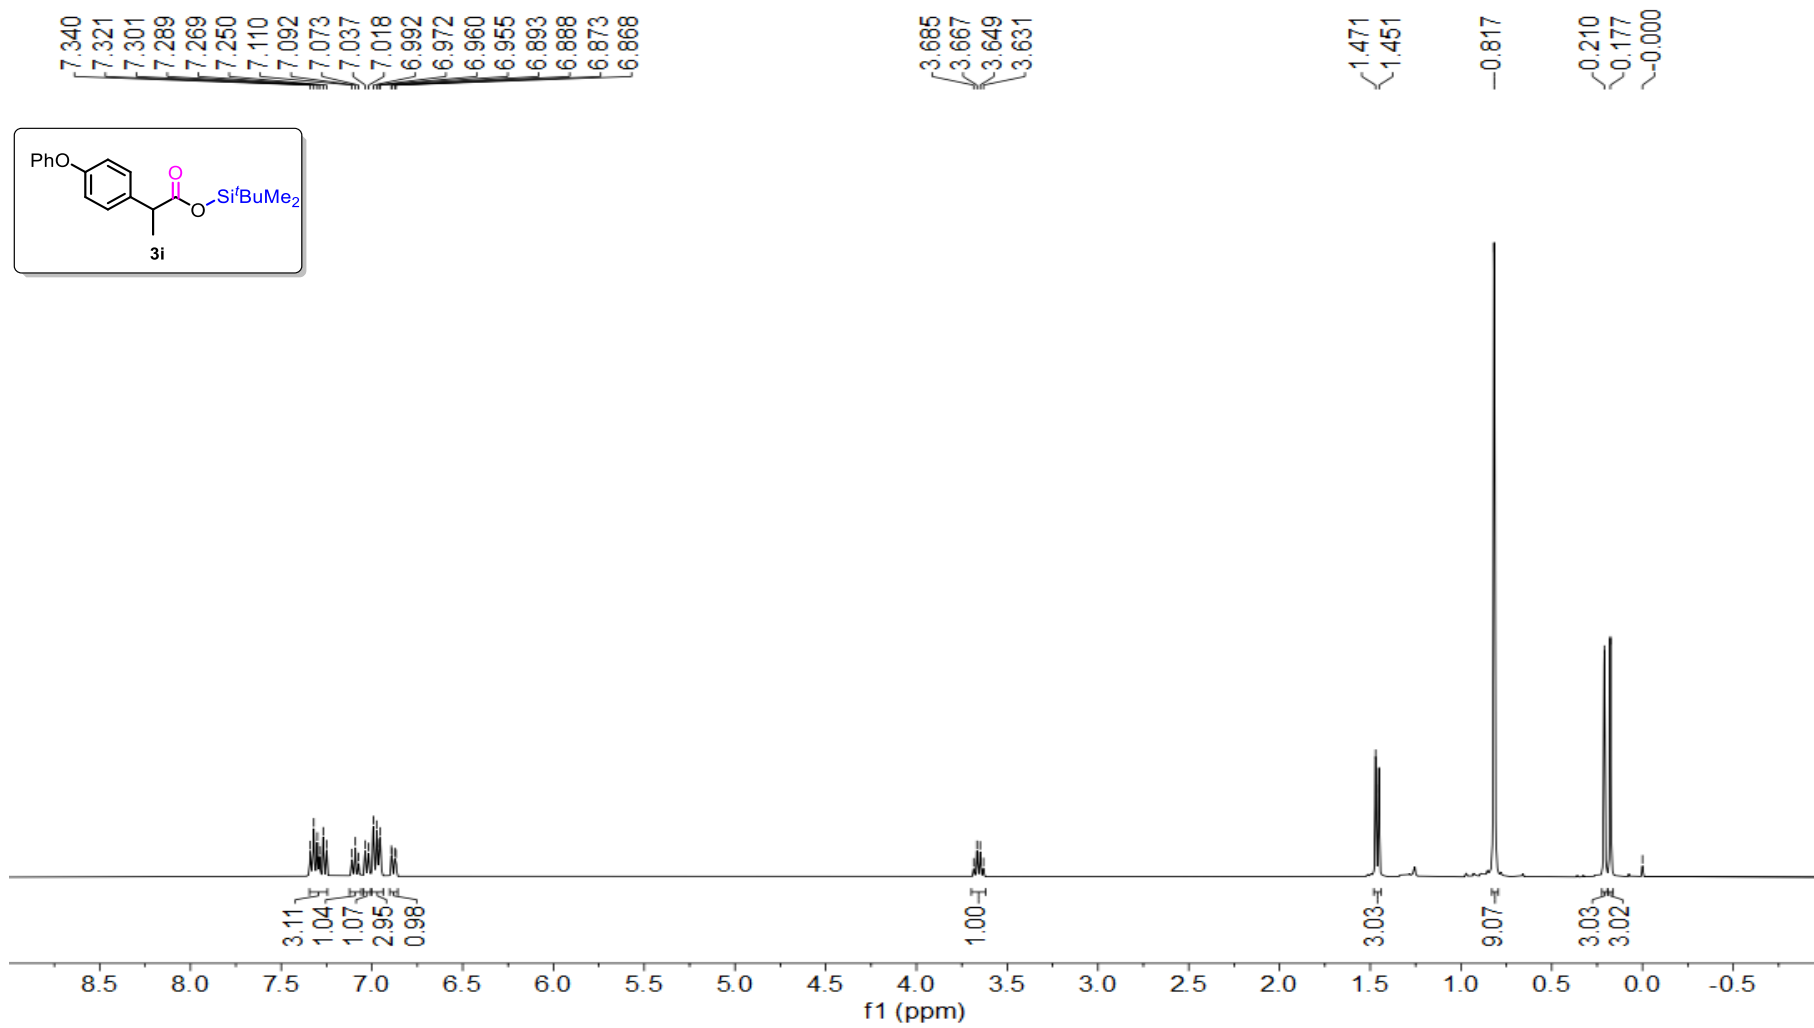

<sup>13</sup>C NMR Spectra (101 MHz, CDCl<sub>3</sub>) of **3i**

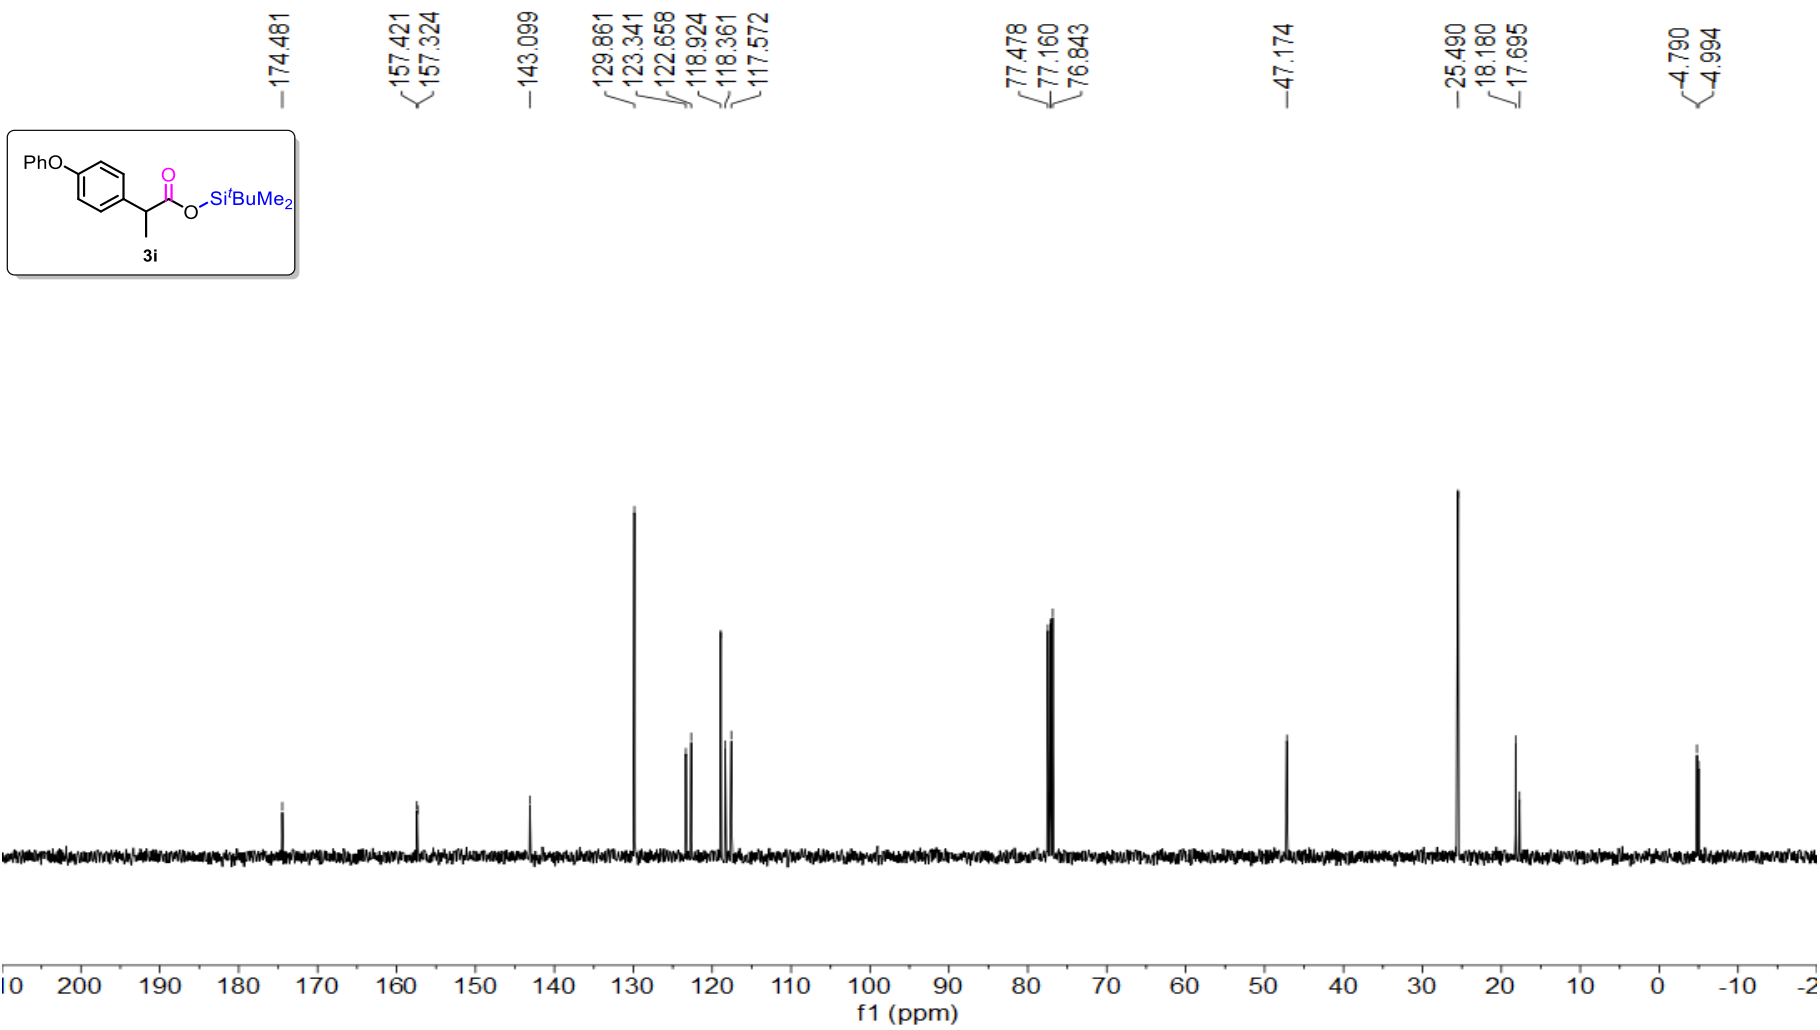

<sup>1</sup>H NMR Spectra (400 MHz, CDCl<sub>3</sub>) of **3j**

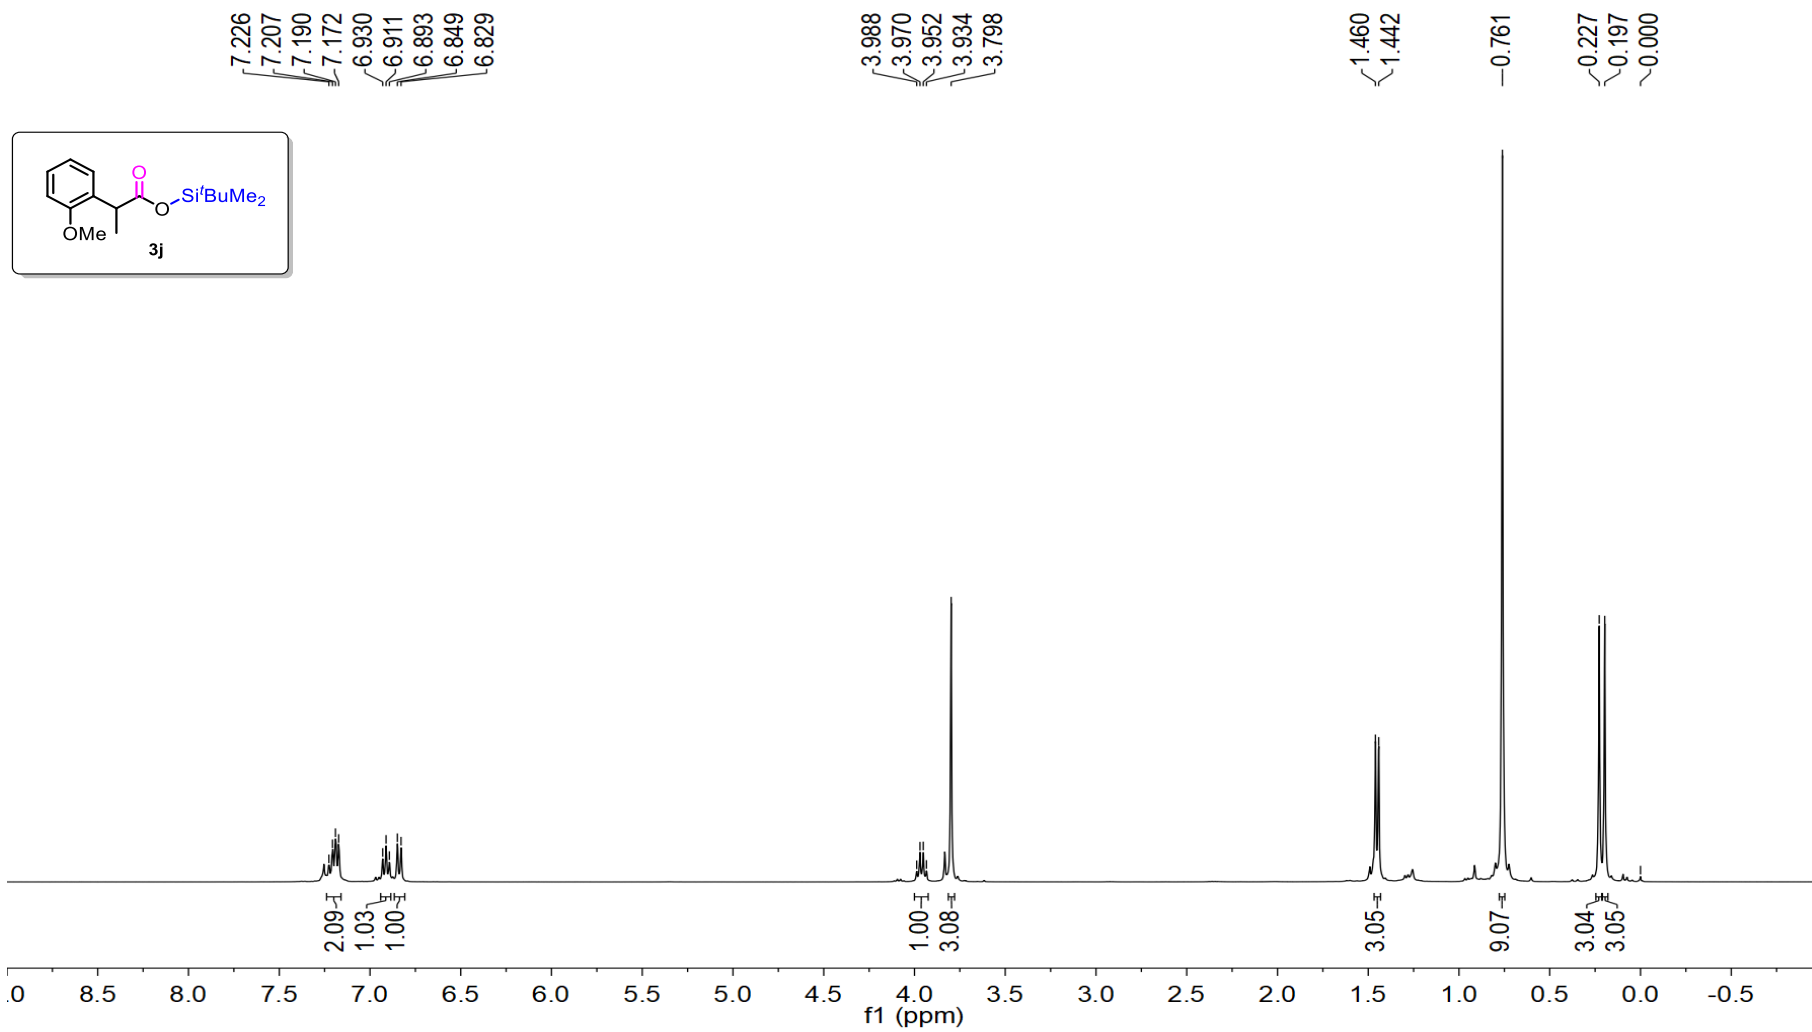

<sup>13</sup>C NMR Spectra (101 MHz, CDCl<sub>3</sub>) of **3j**

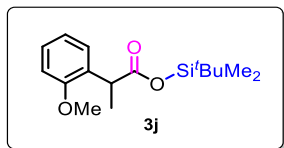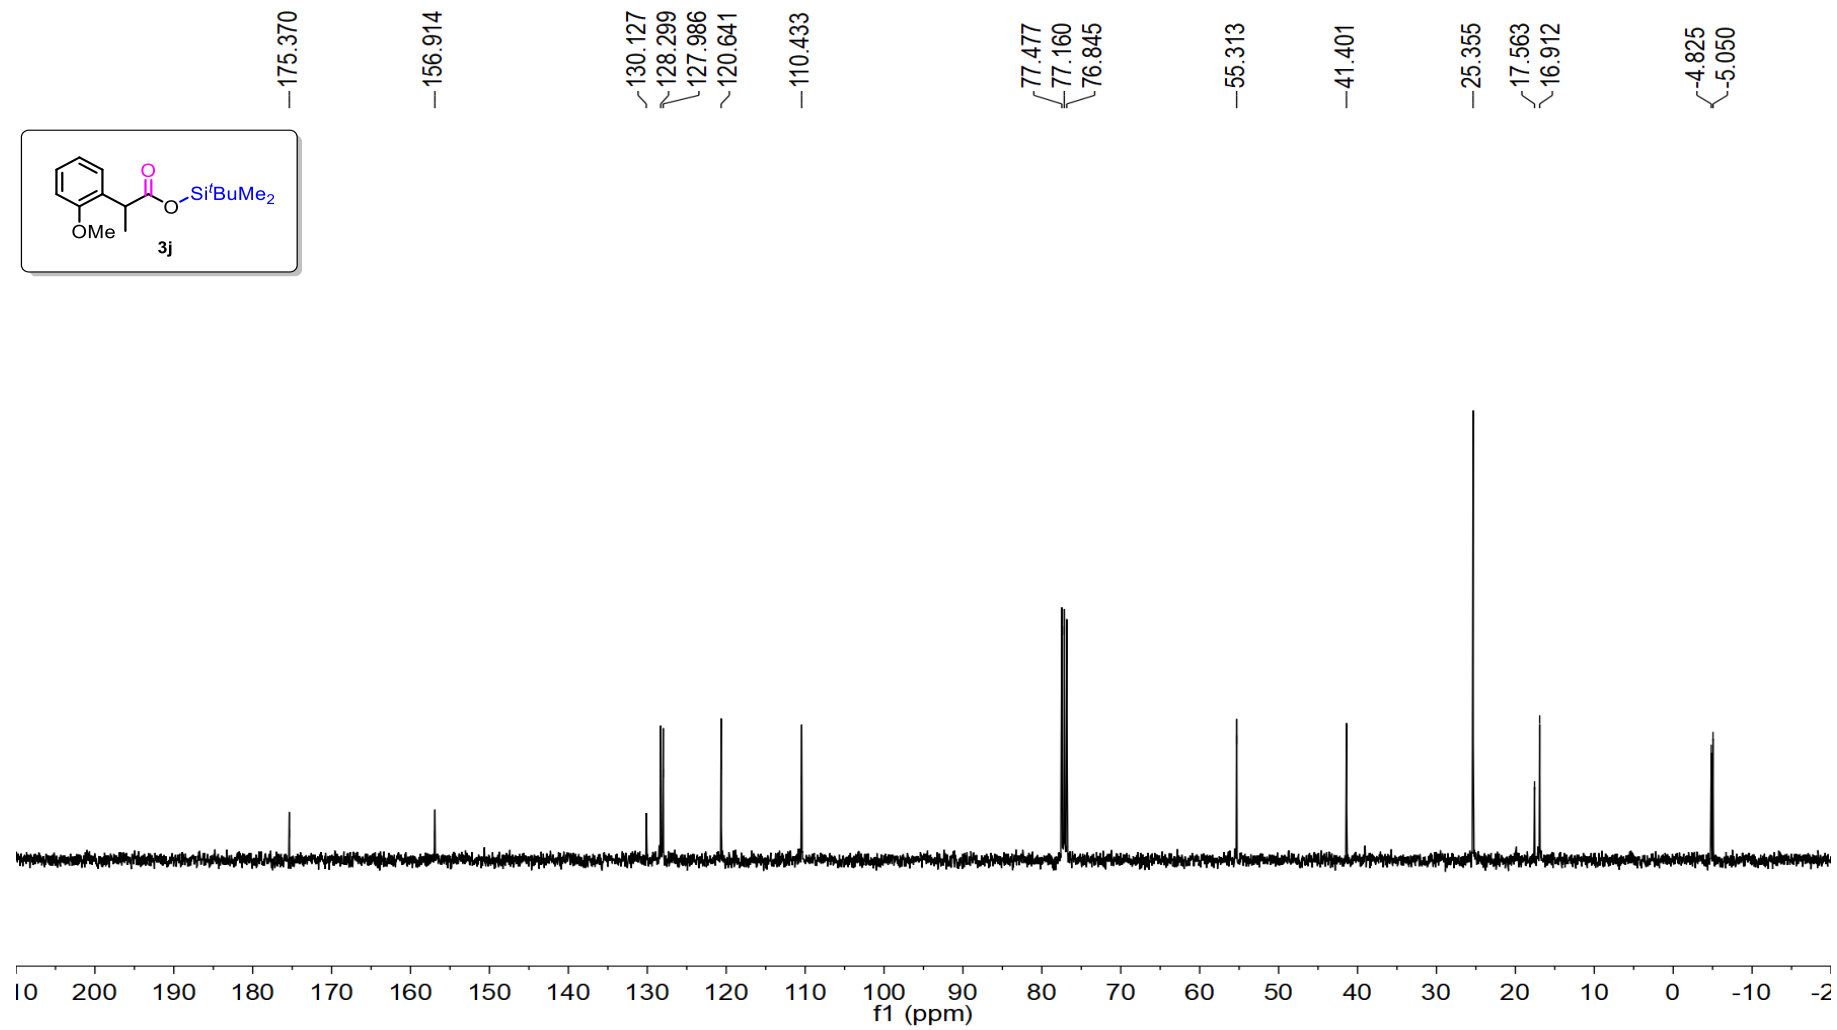



<sup>1</sup>H NMR Spectra (400 MHz, CDCl<sub>3</sub>) of **3k**

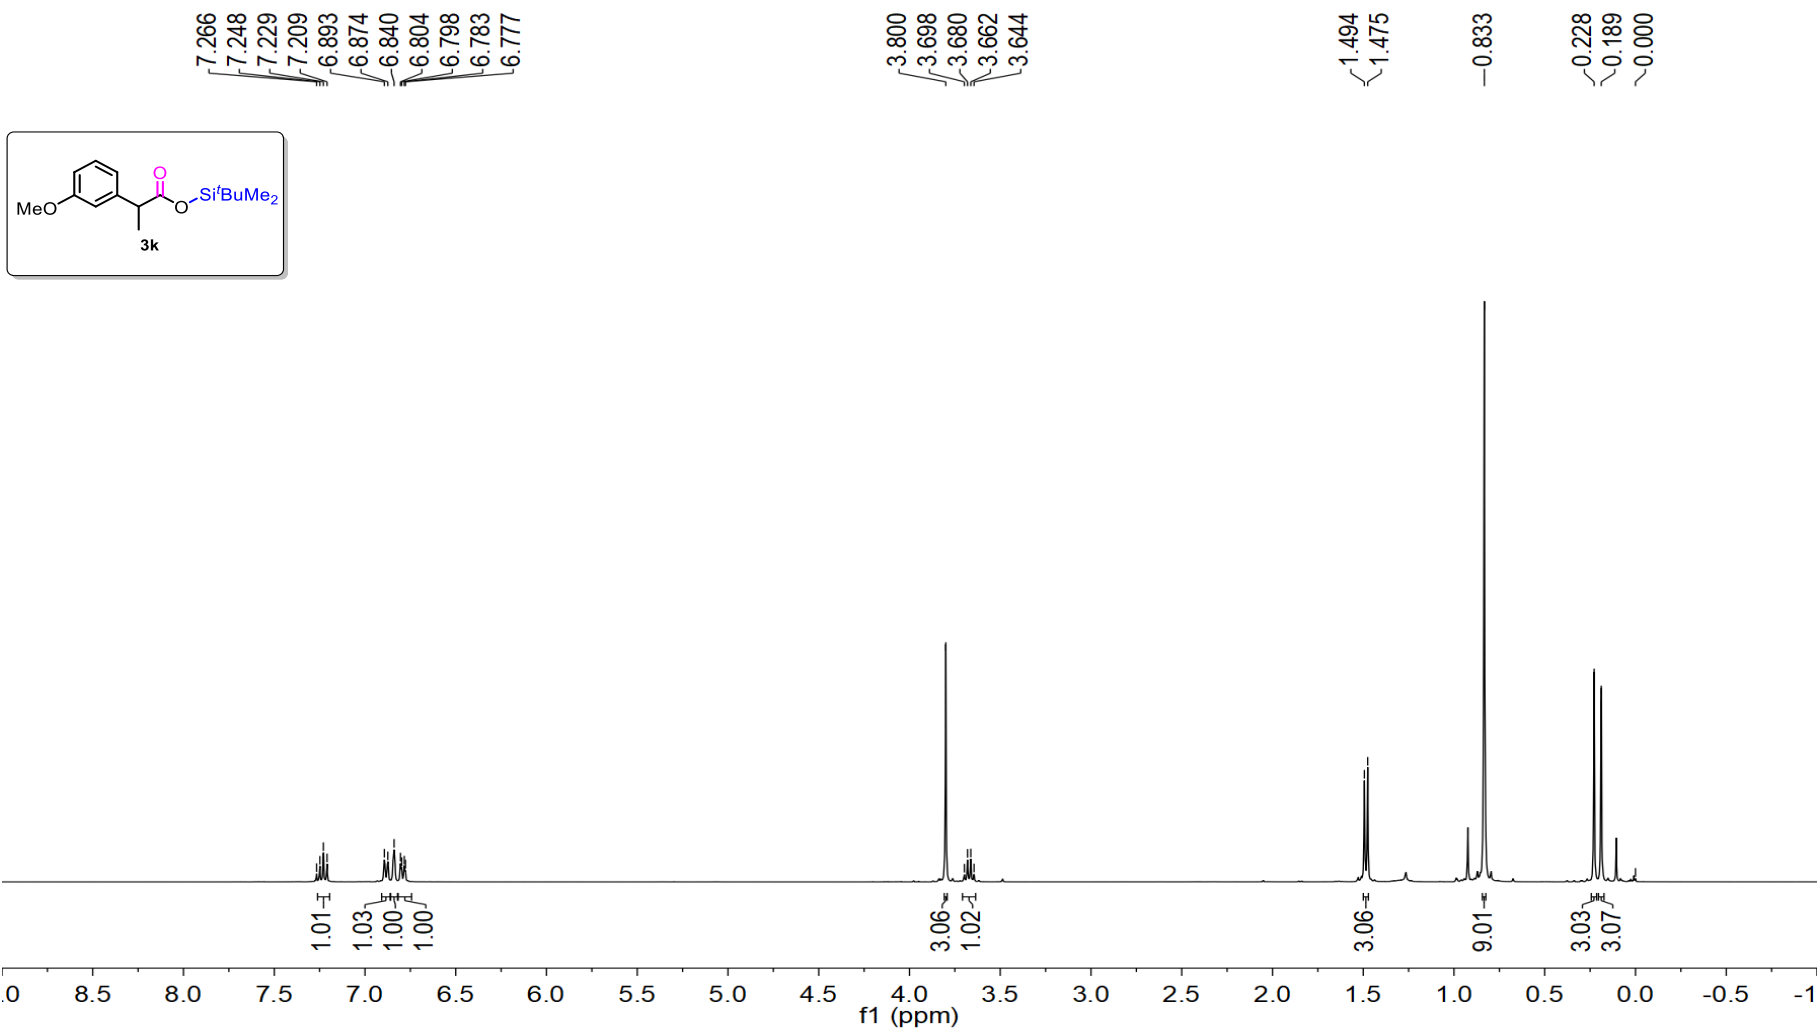

<sup>13</sup>C NMR Spectra (101 MHz, CDCl<sub>3</sub>) of **3k**

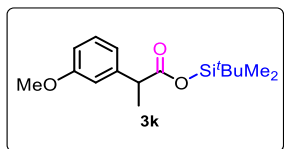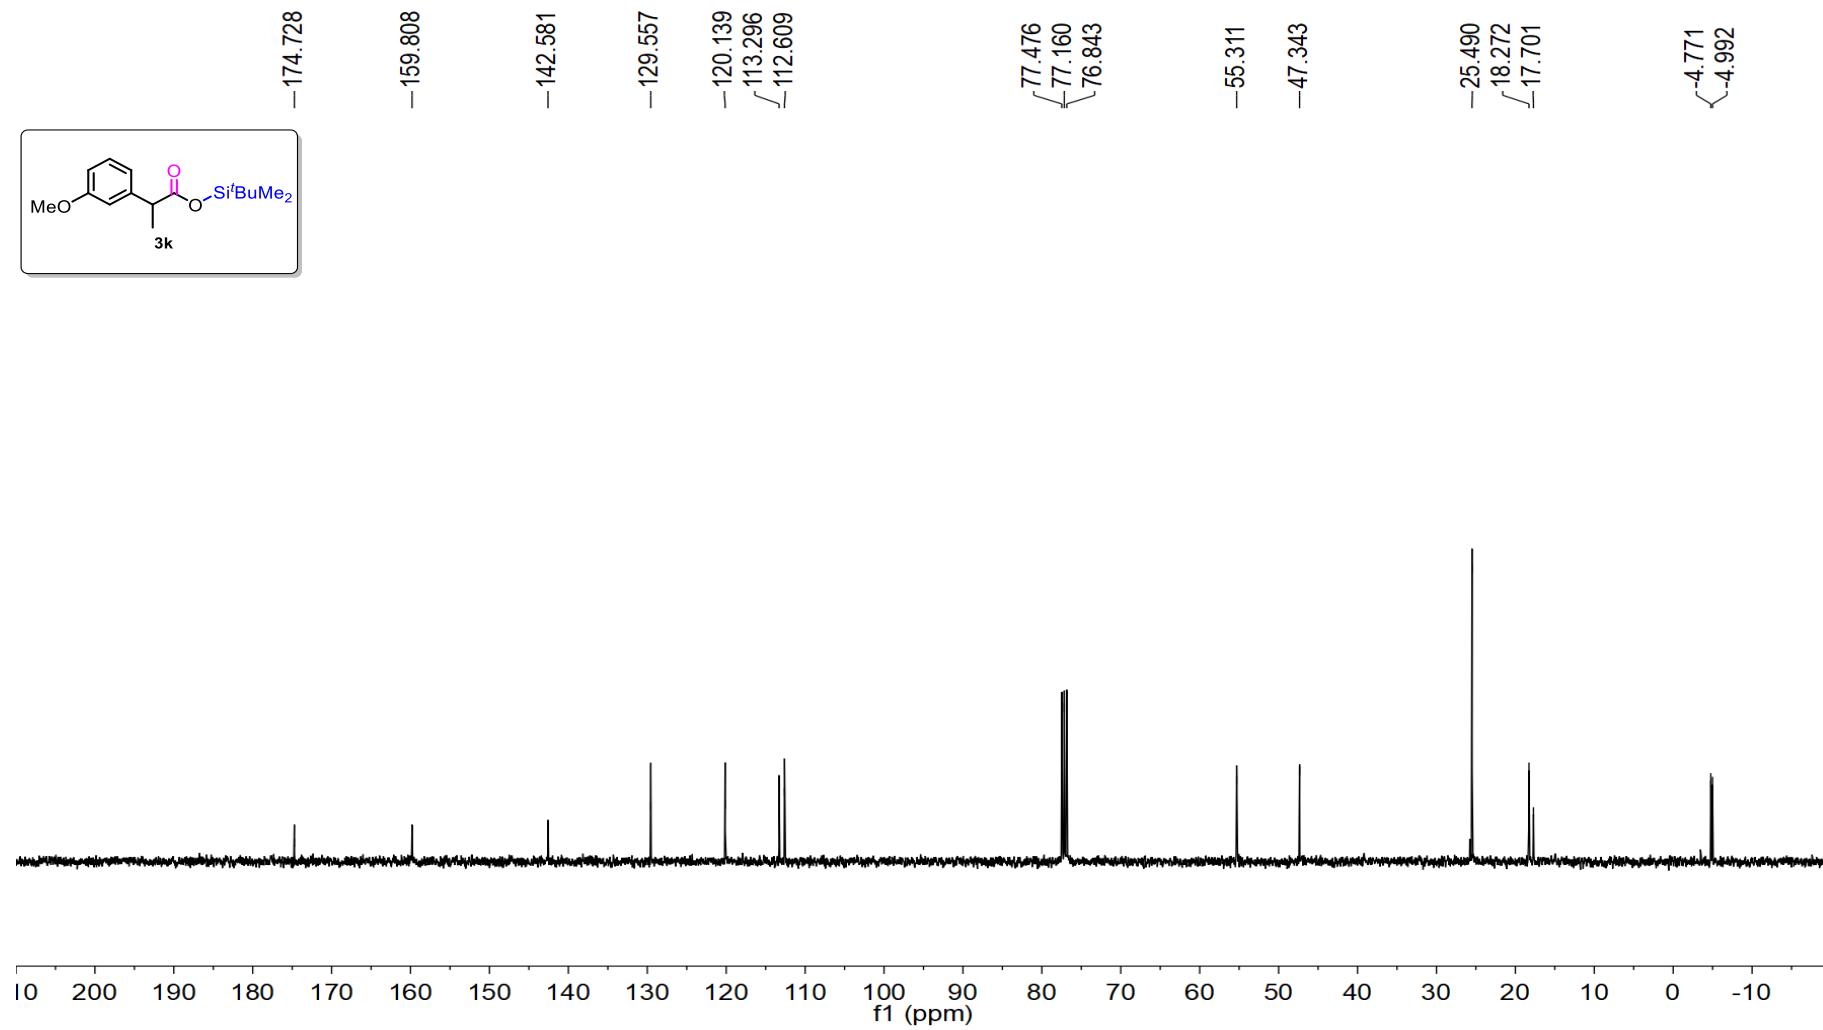

<sup>1</sup>H NMR Spectra (400 MHz, CDCl<sub>3</sub>) of **31**

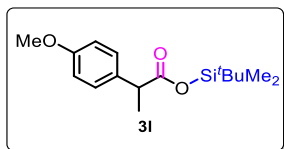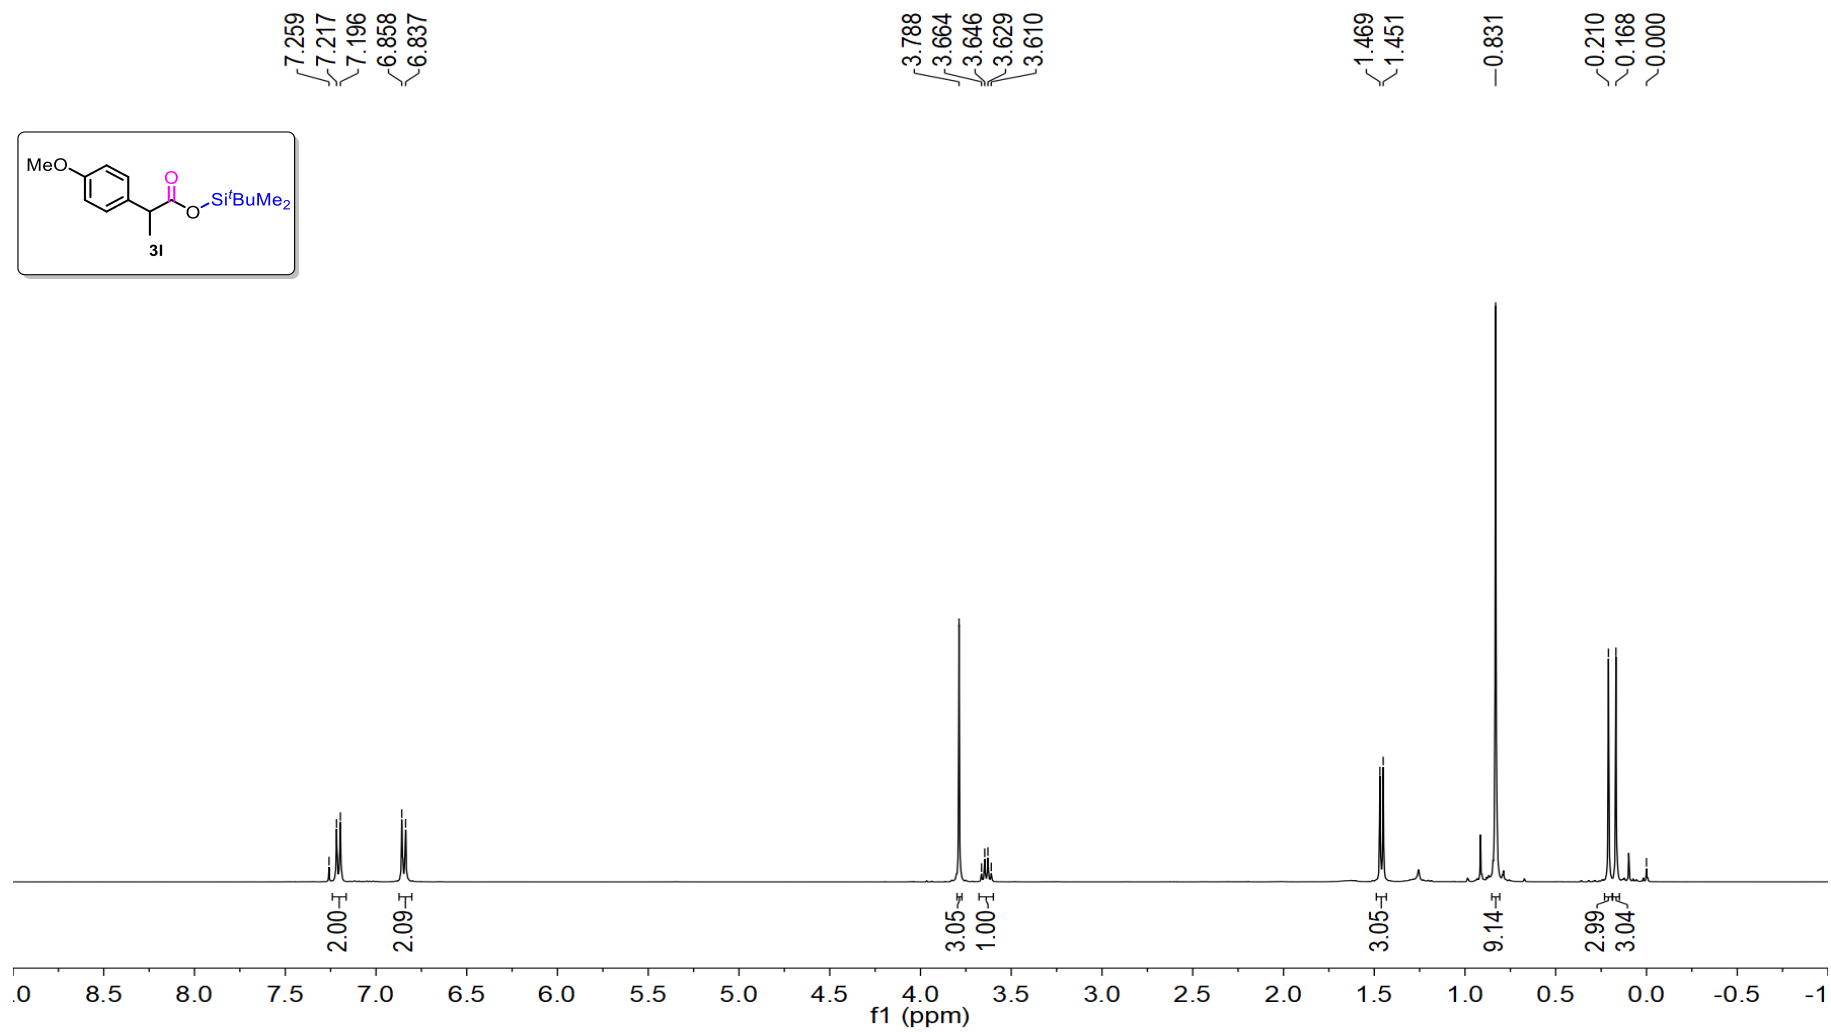

<sup>13</sup>C NMR Spectra (101 MHz, CDCl<sub>3</sub>) of **31**

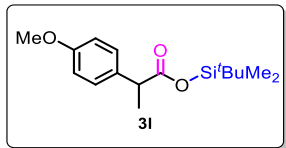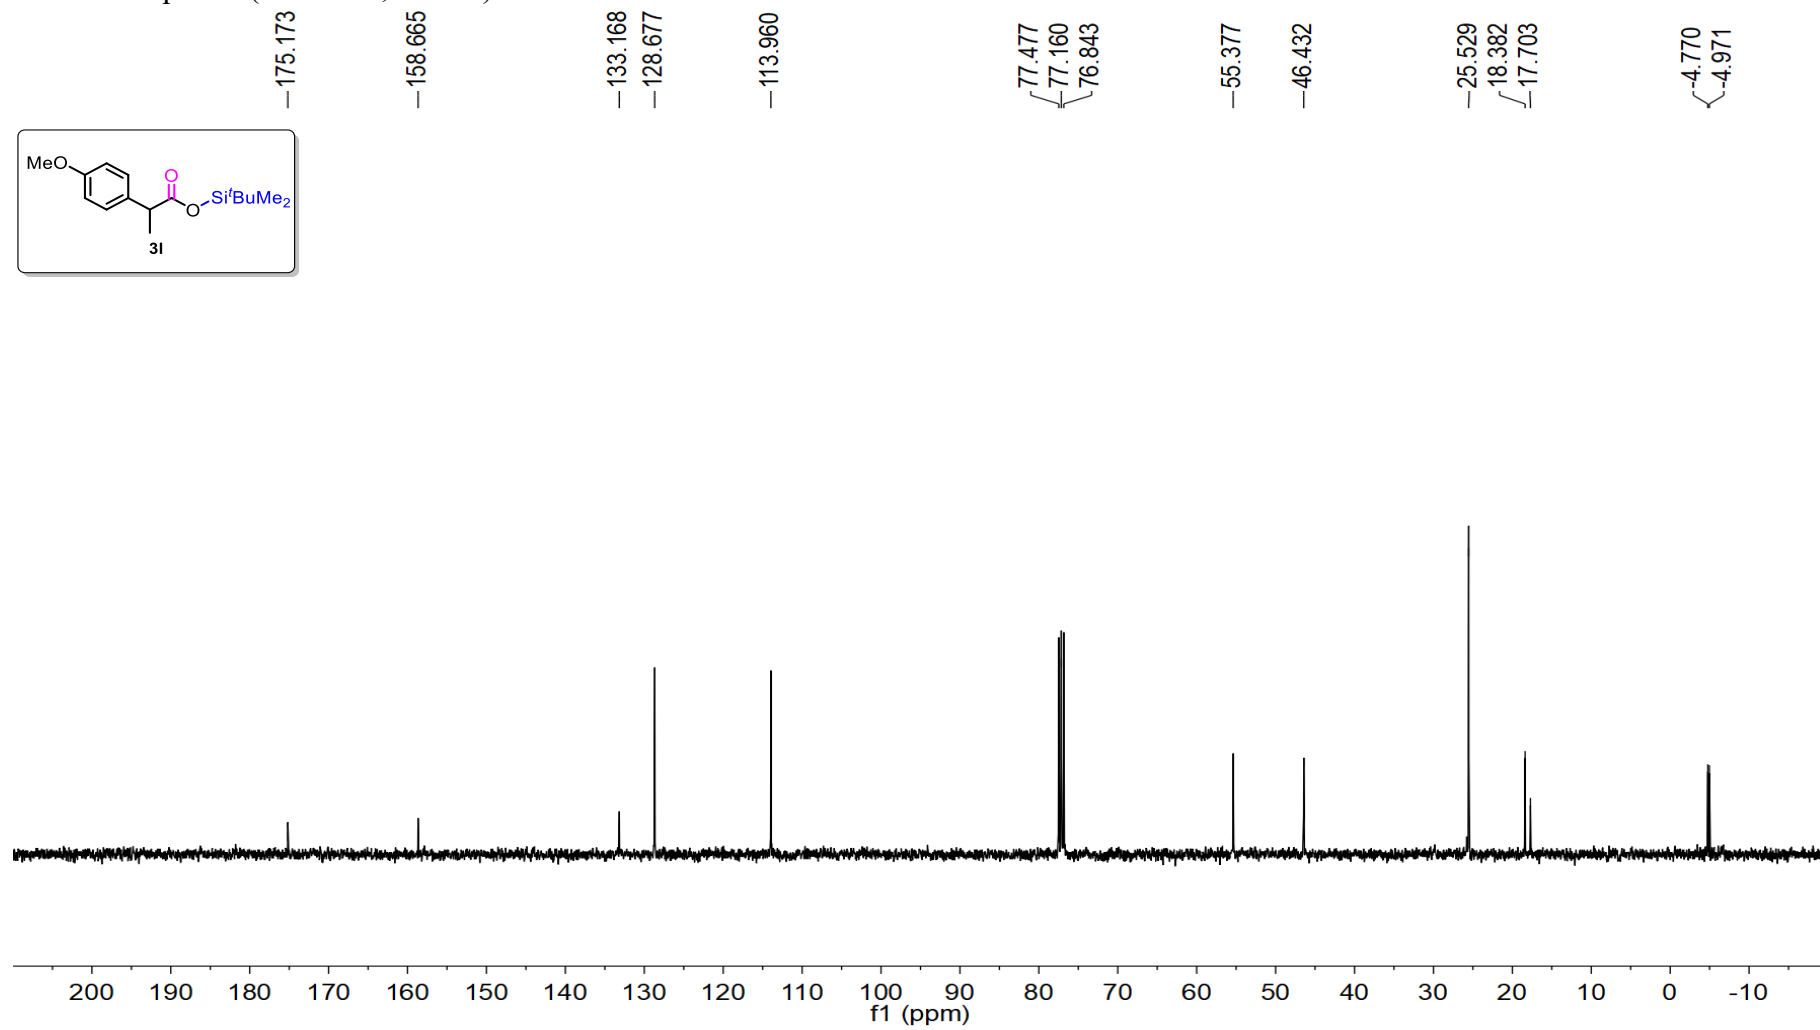

<sup>1</sup>H NMR Spectra (400 MHz, CDCl<sub>3</sub>) of **3m**

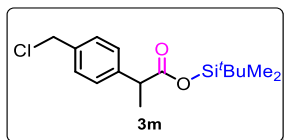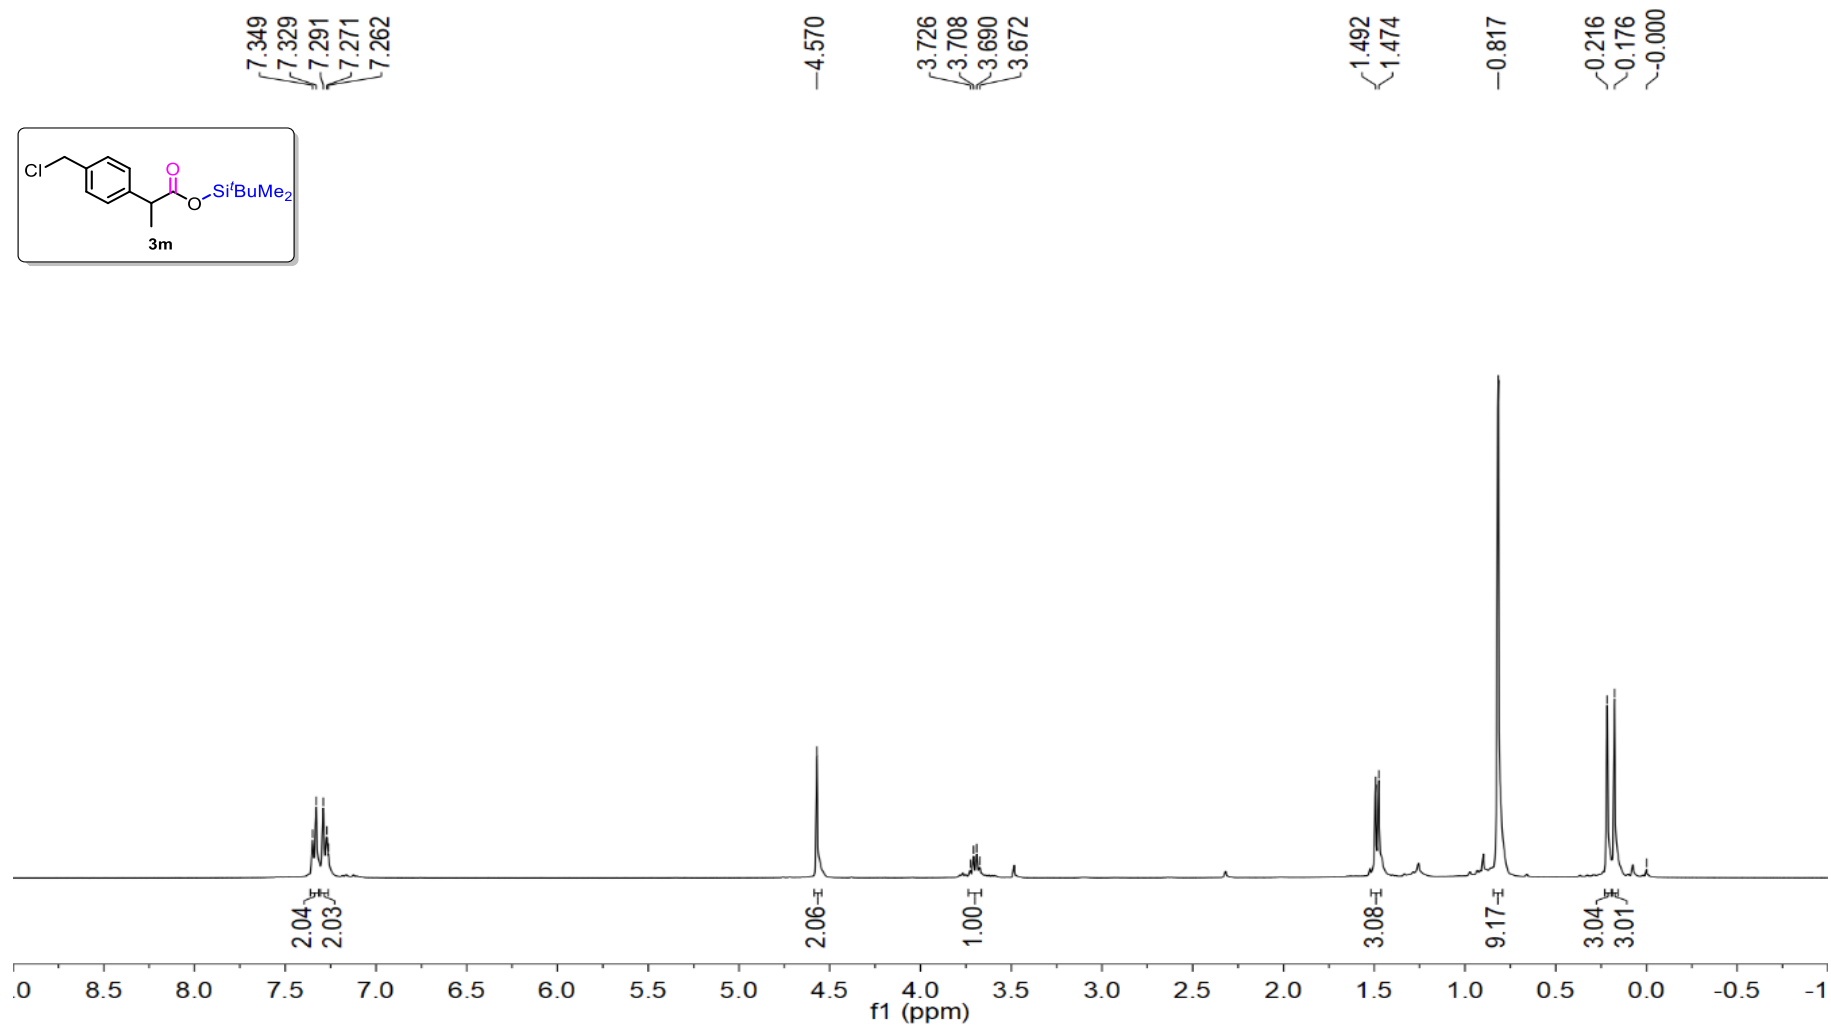

<sup>13</sup>C NMR Spectra (101 MHz, CDCl<sub>3</sub>) of **3m**

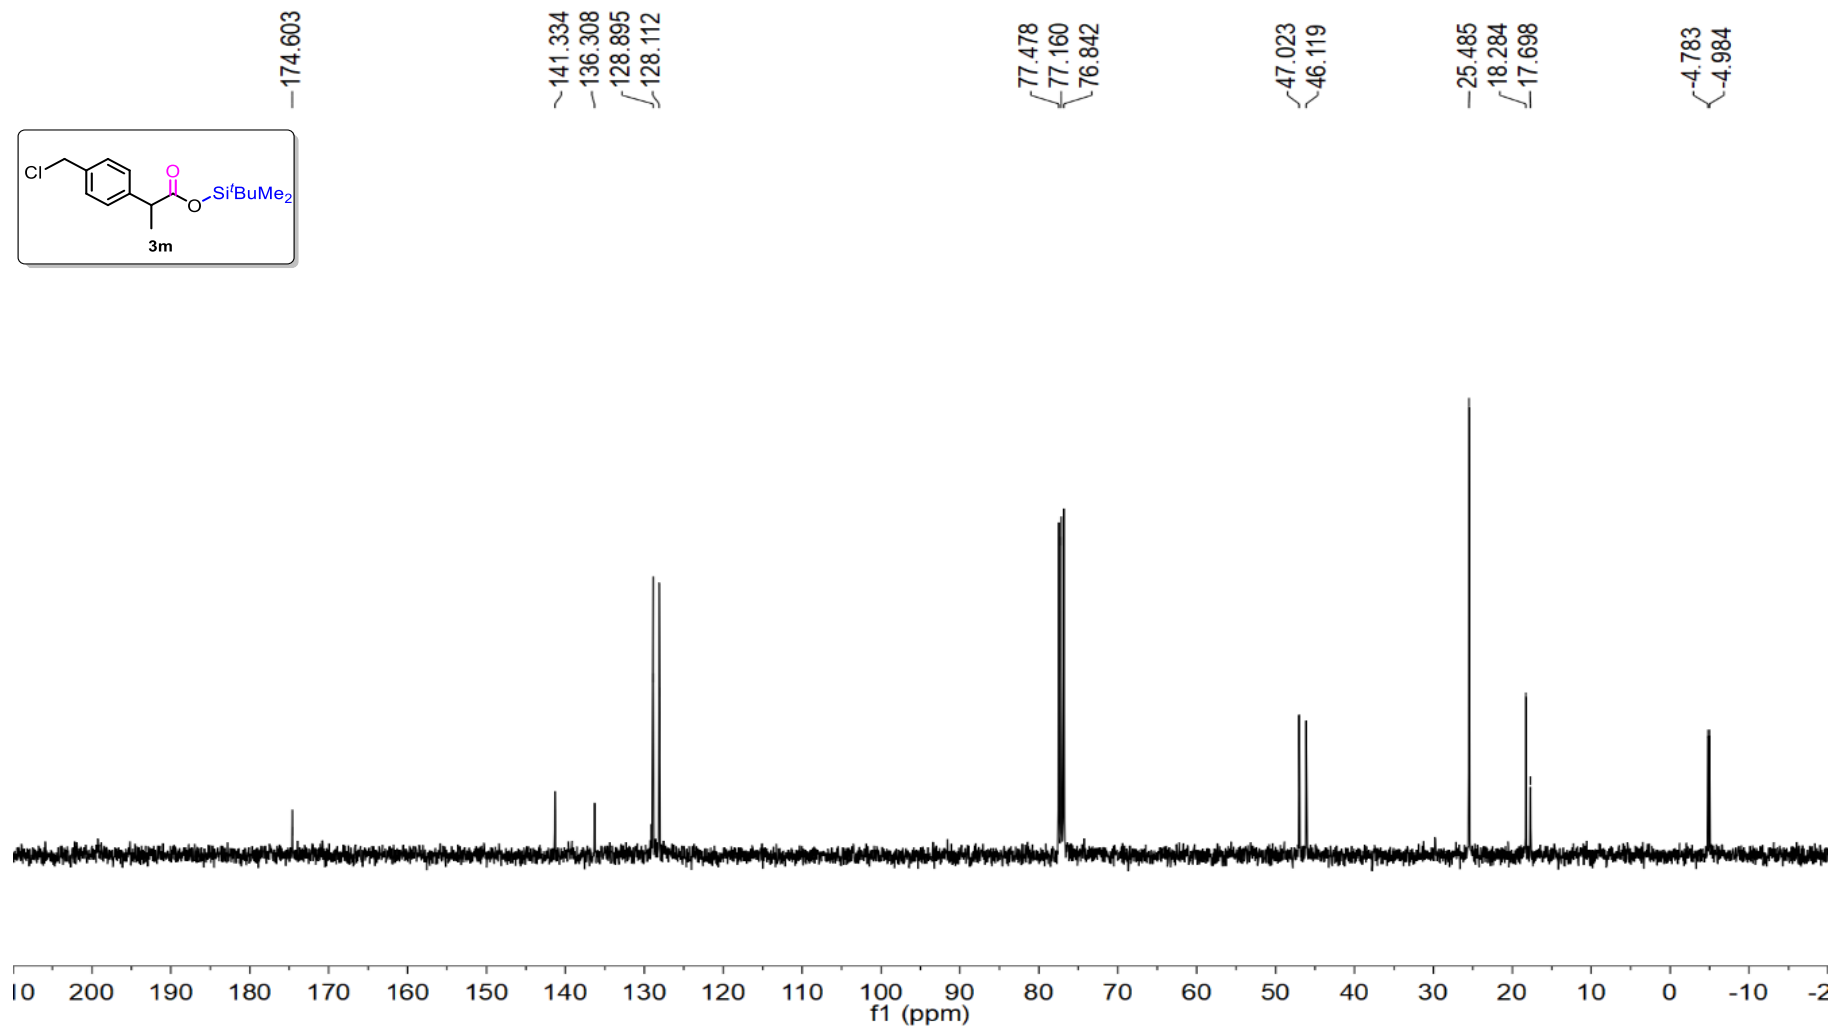

<sup>1</sup>H NMR Spectra (400 MHz, CDCl<sub>3</sub>) of **3n**

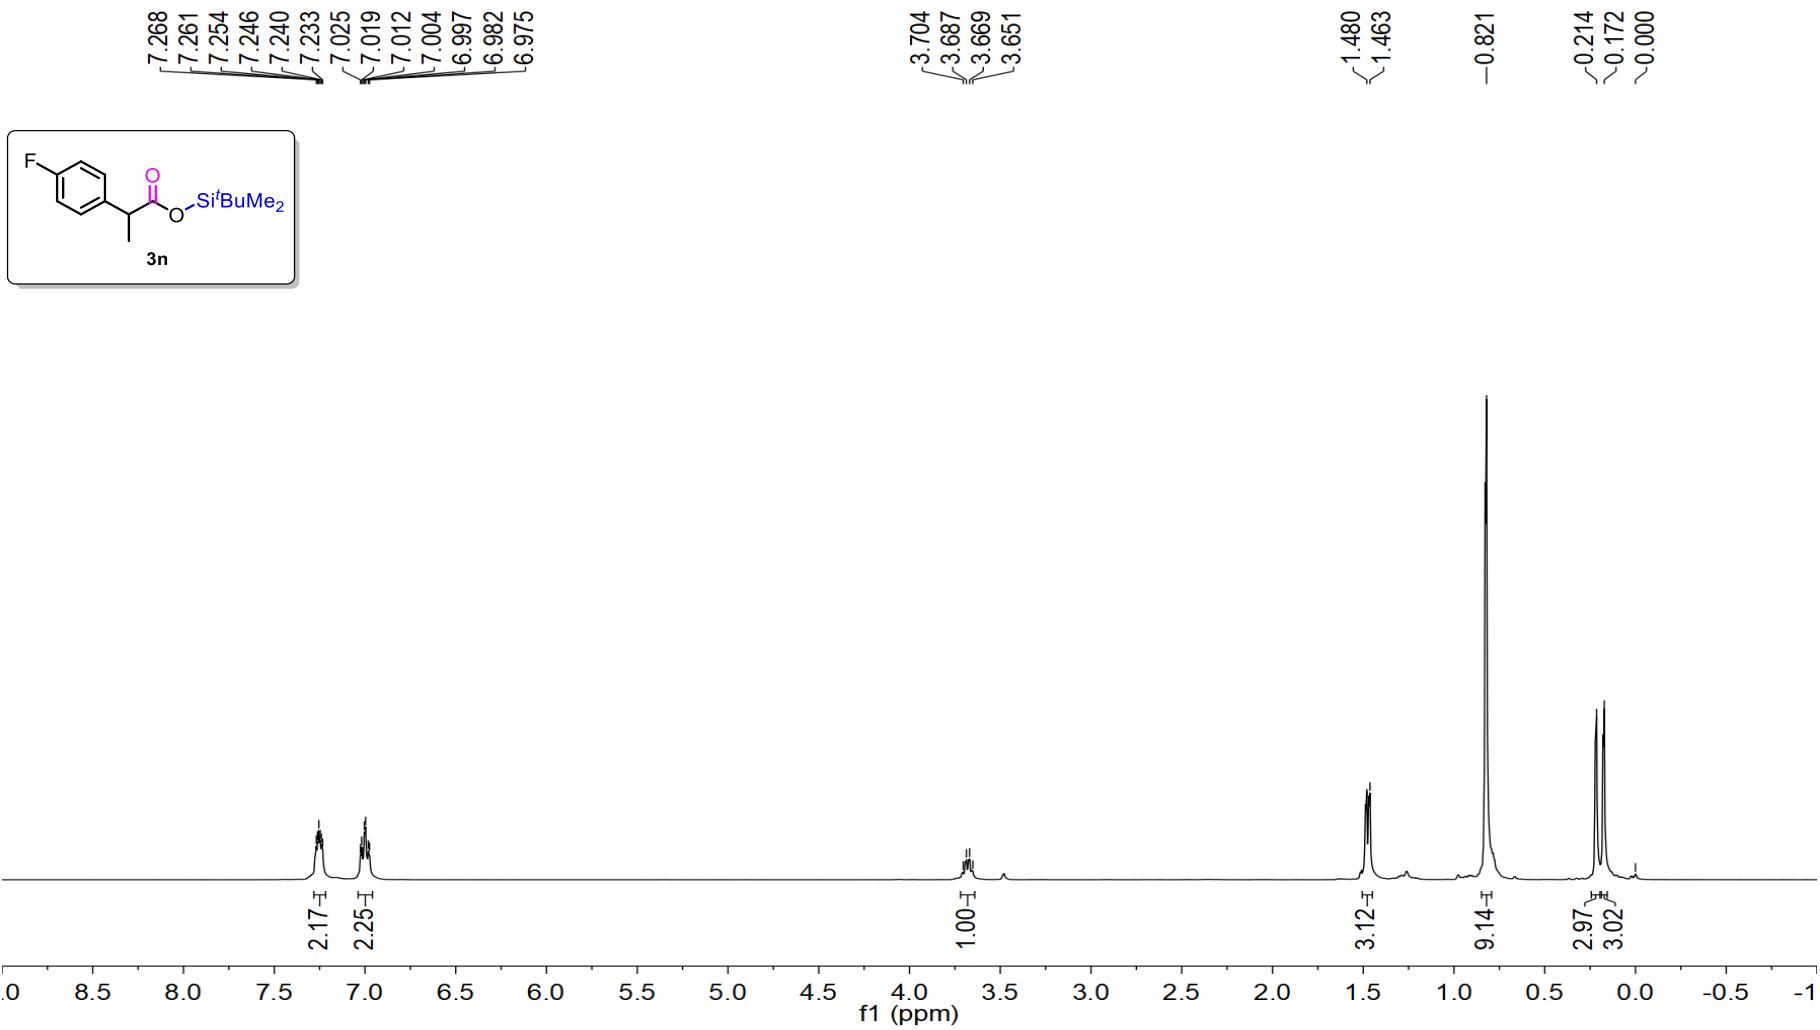

<sup>13</sup>C NMR Spectra (101 MHz, CDCl<sub>3</sub>) of **3n**

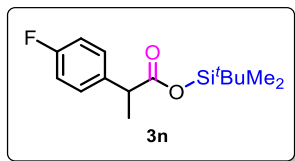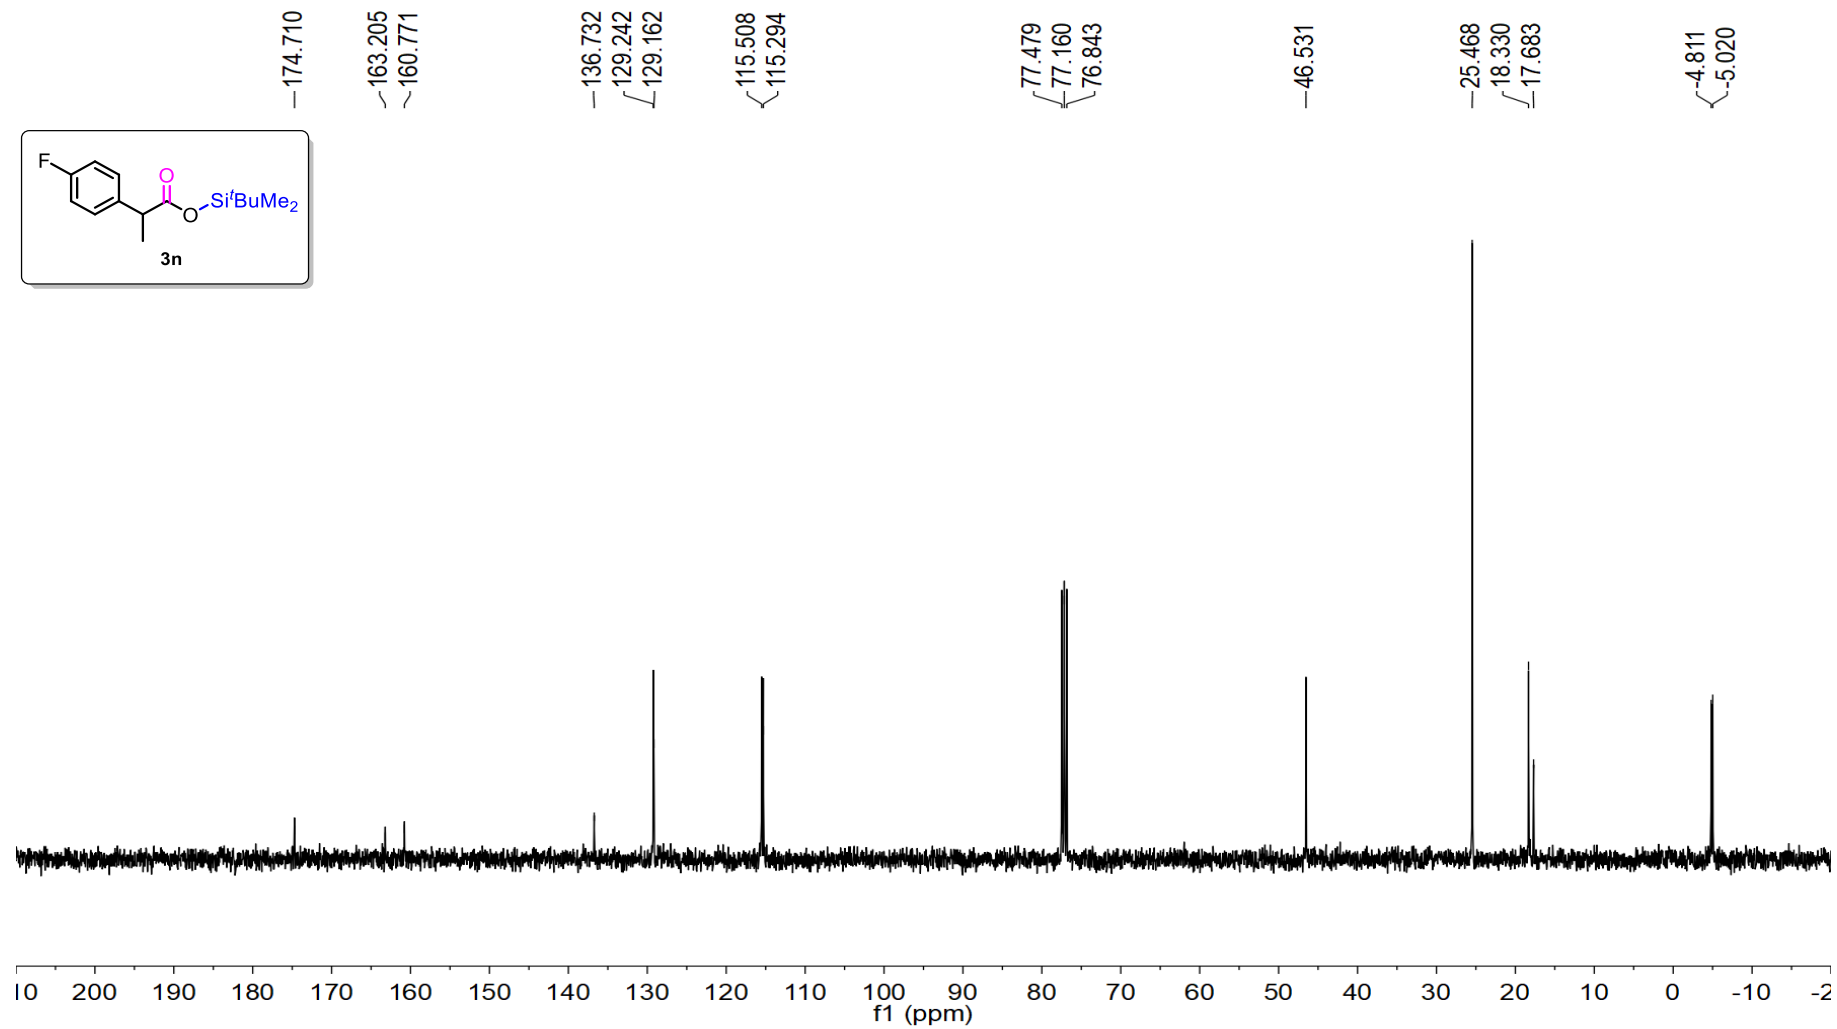



<sup>1</sup>H NMR Spectra (400 MHz, CDCl<sub>3</sub>) of **3o**

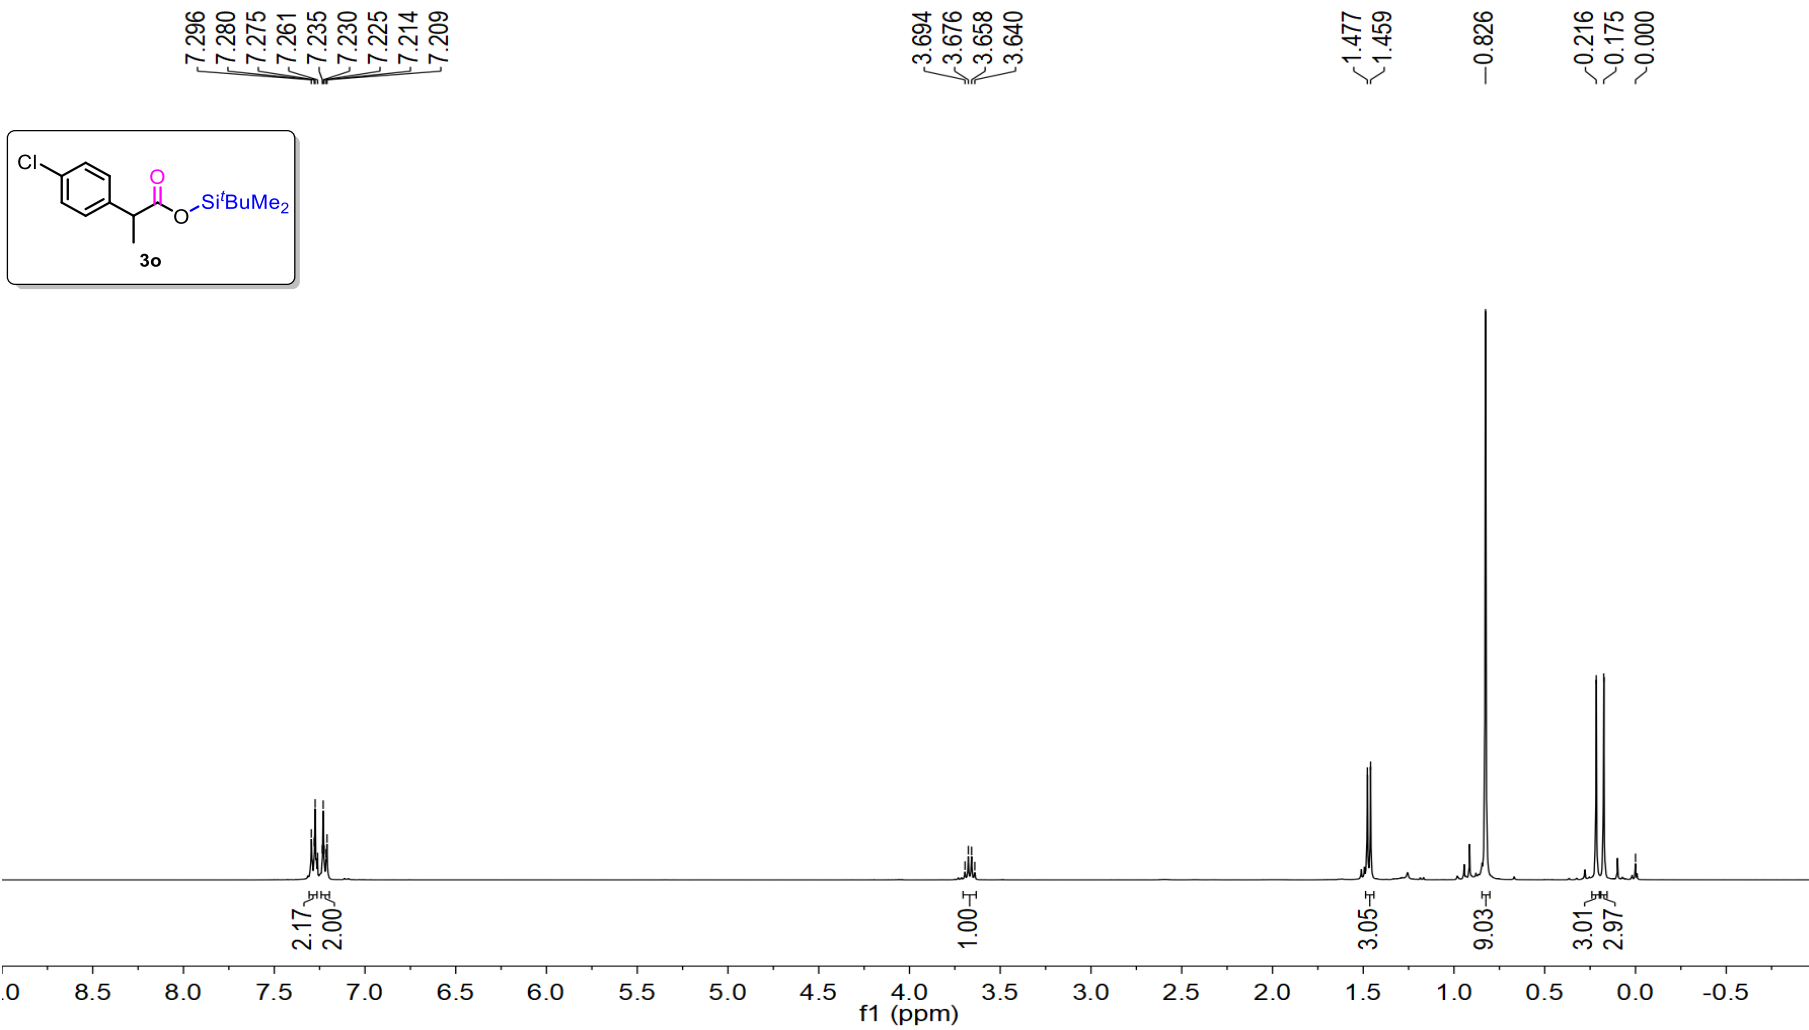

<sup>13</sup>C NMR Spectra (101 MHz, CDCl<sub>3</sub>) of **3o**

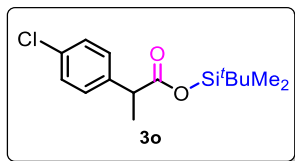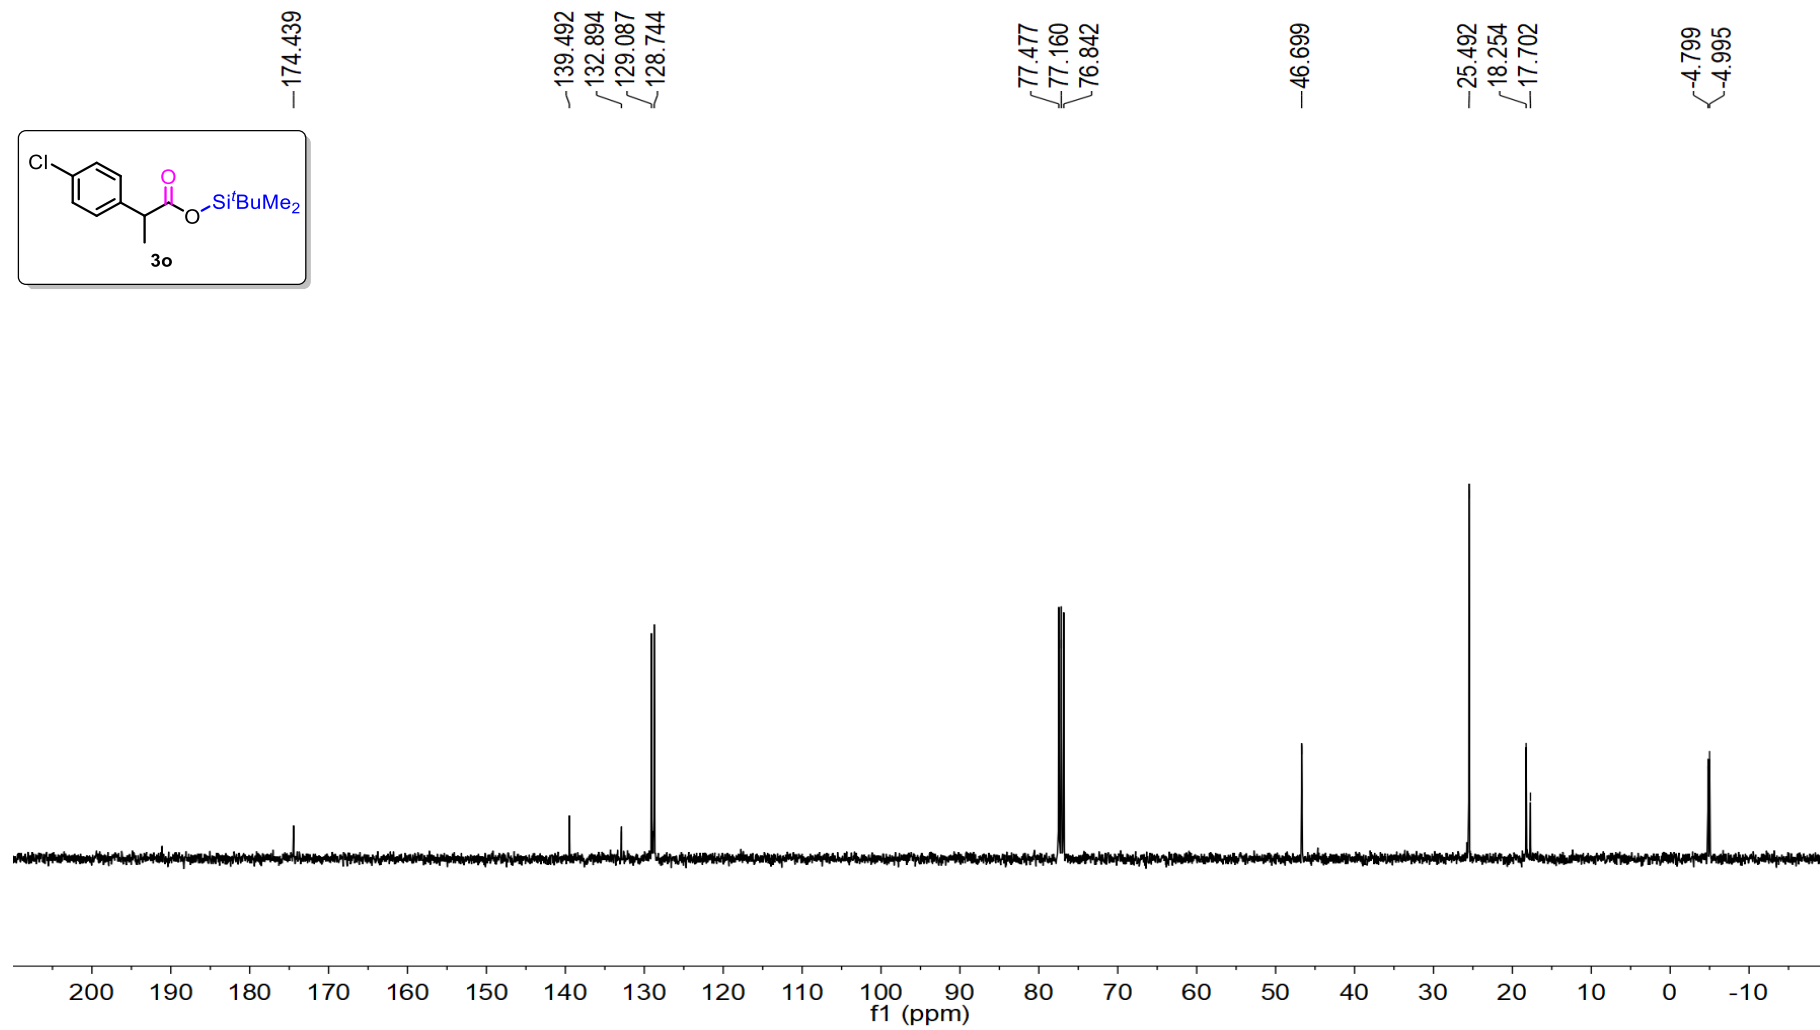

<sup>1</sup>H NMR Spectra (400 MHz, CDCl<sub>3</sub>) of **3p**

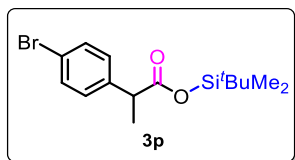

7.452  
7.431  
7.267  
7.181  
7.161

3.687  
3.669  
3.651  
3.633

1.480  
1.462

-0.835

0.224  
0.184  
-0.000

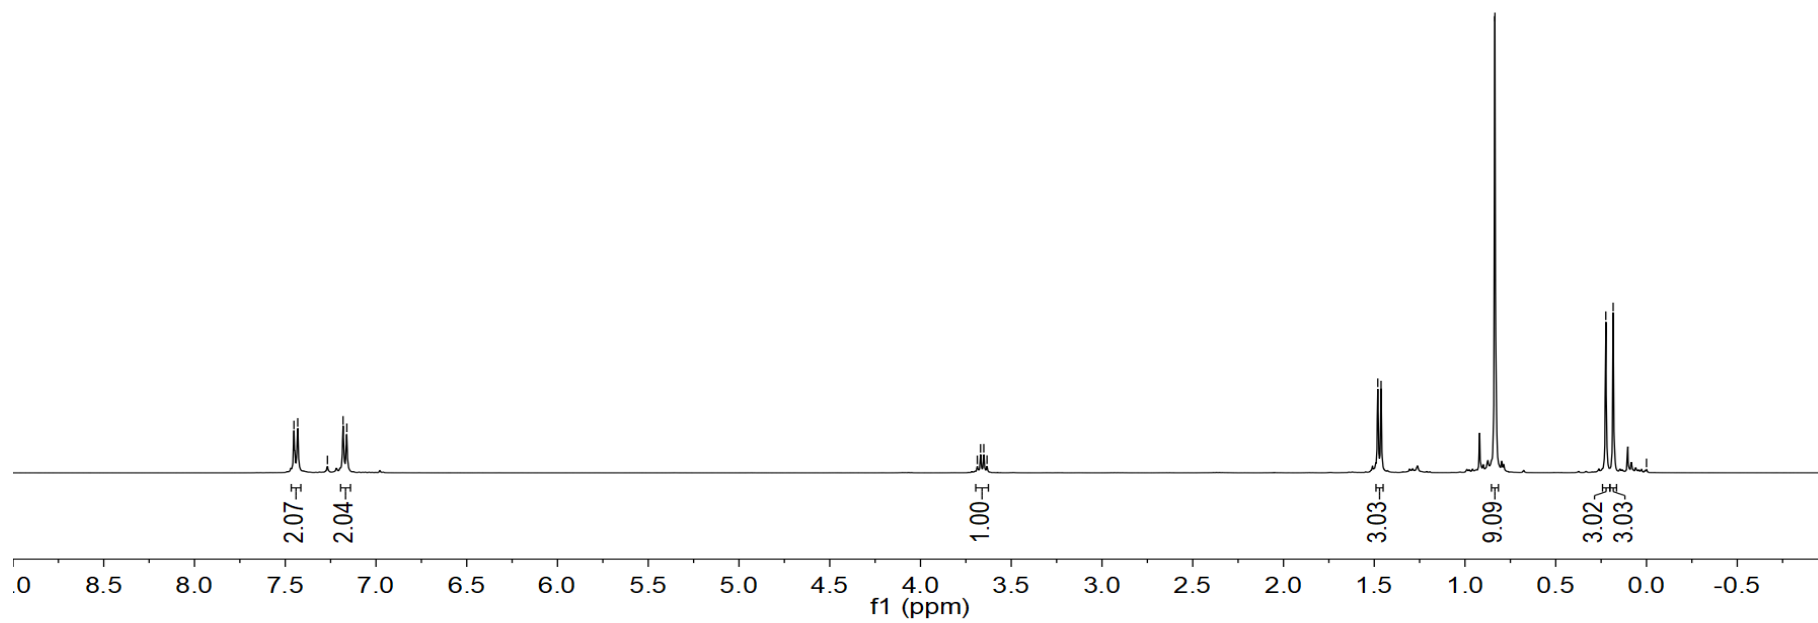

<sup>13</sup>C NMR Spectra (101 MHz, CDCl<sub>3</sub>) of **3p**

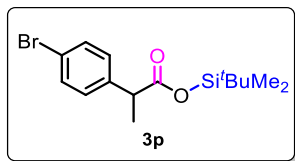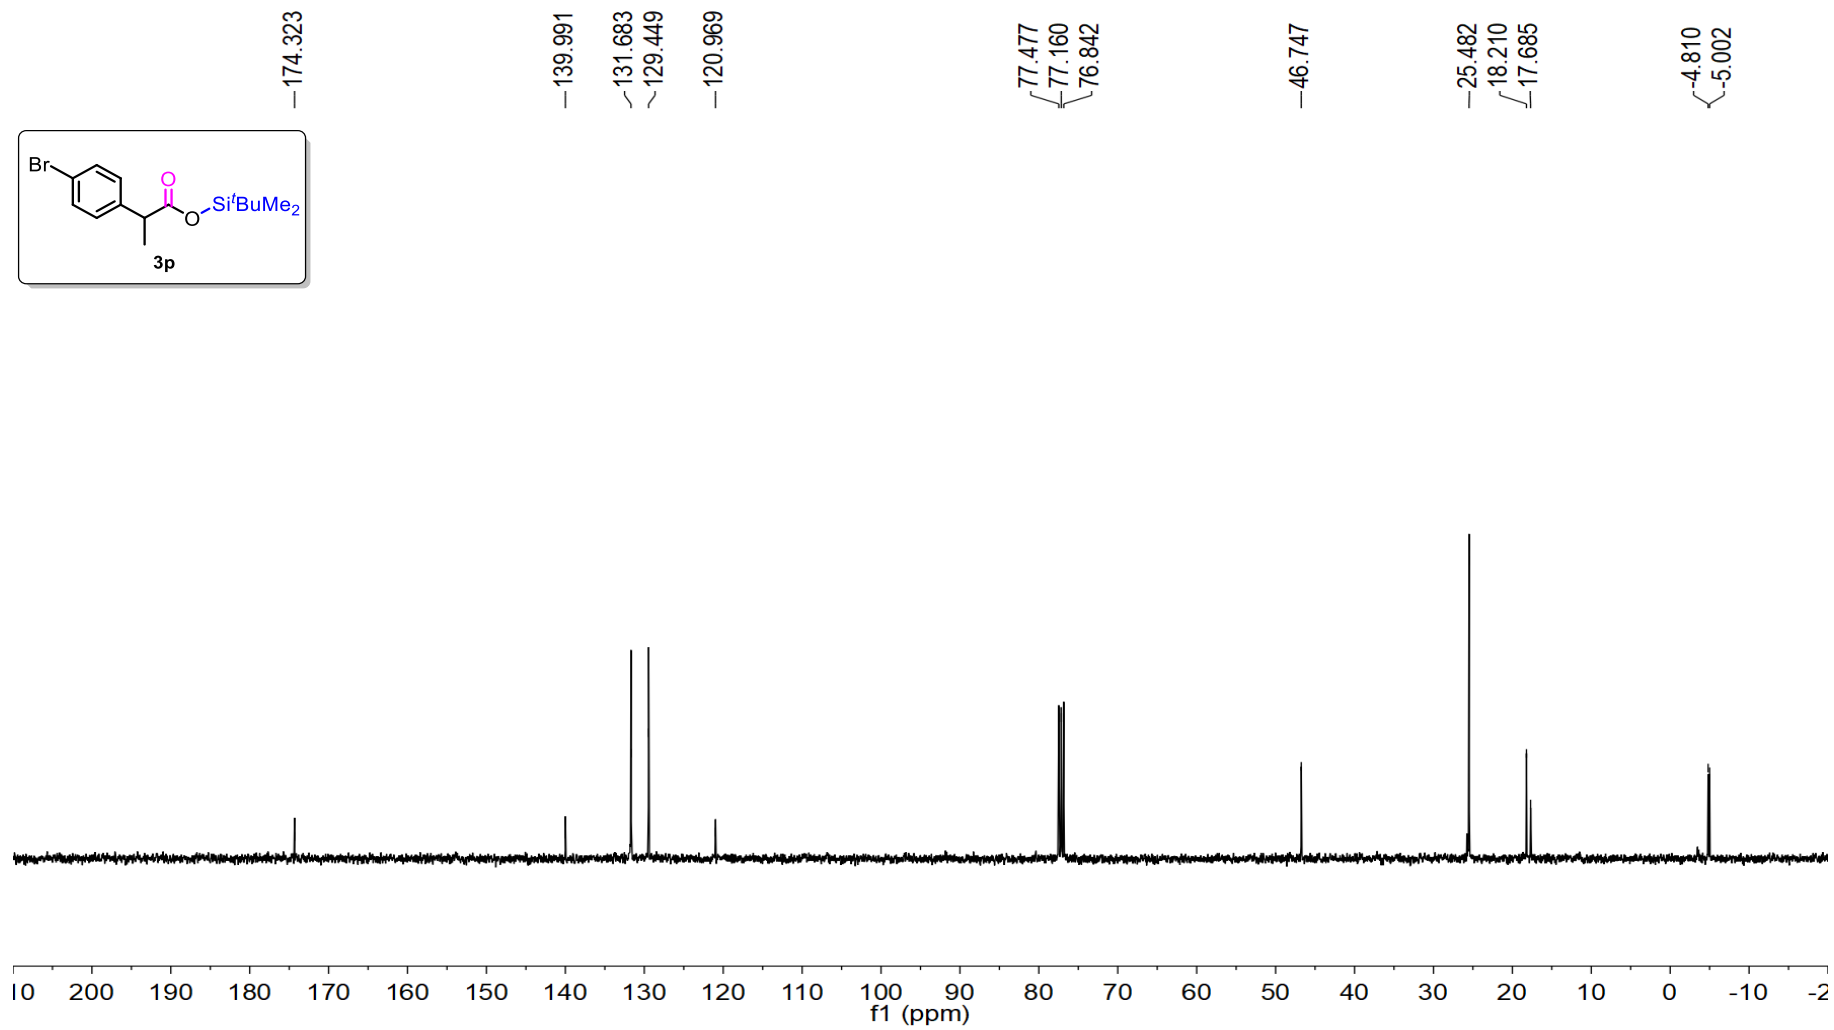

$^1\text{H}$  NMR Spectra (400 MHz,  $\text{CDCl}_3$ ) of **3q**

7.558  
7.522  
7.504  
7.493  
7.473  
7.455  
7.436  
7.262

3.791  
3.773  
3.756  
3.737

1.529  
1.513

-0.805

-0.220  
-0.179  
-0.000

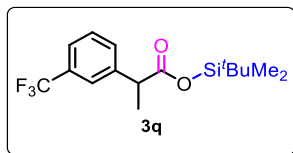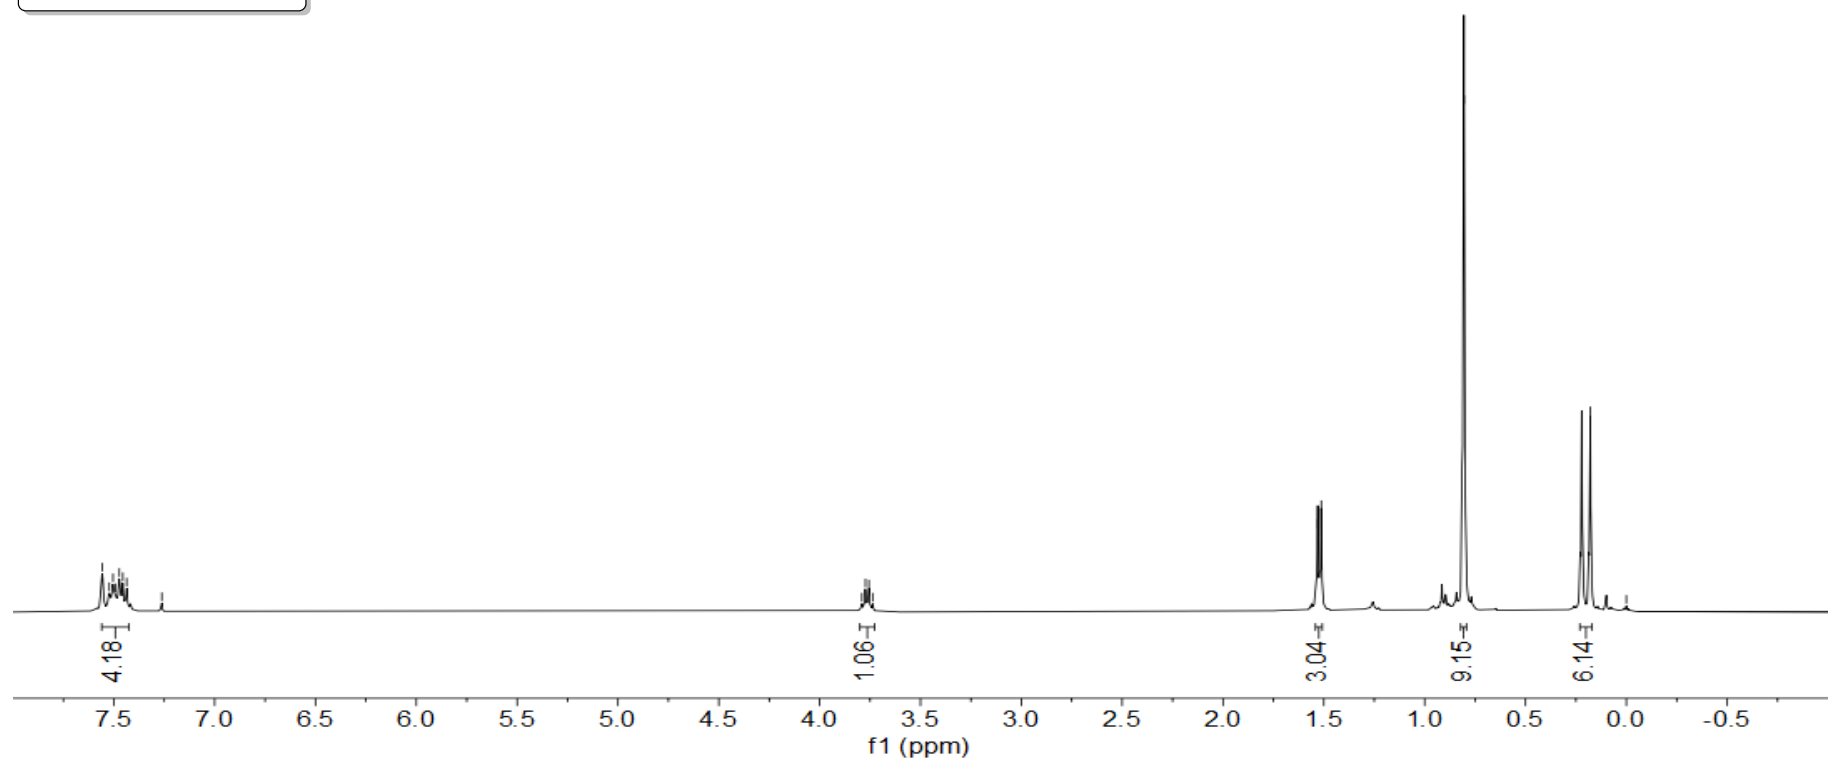

<sup>13</sup>C NMR Spectra (101 MHz, CDCl<sub>3</sub>) of **3q**

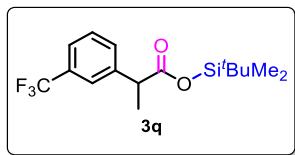

174.051  
141.946  
131.143  
129.096  
125.579  
124.692  
124.658  
124.029  
123.993  
77.478  
77.160  
76.842  
47.159  
25.382  
18.133  
17.641  
4.847  
-5.068

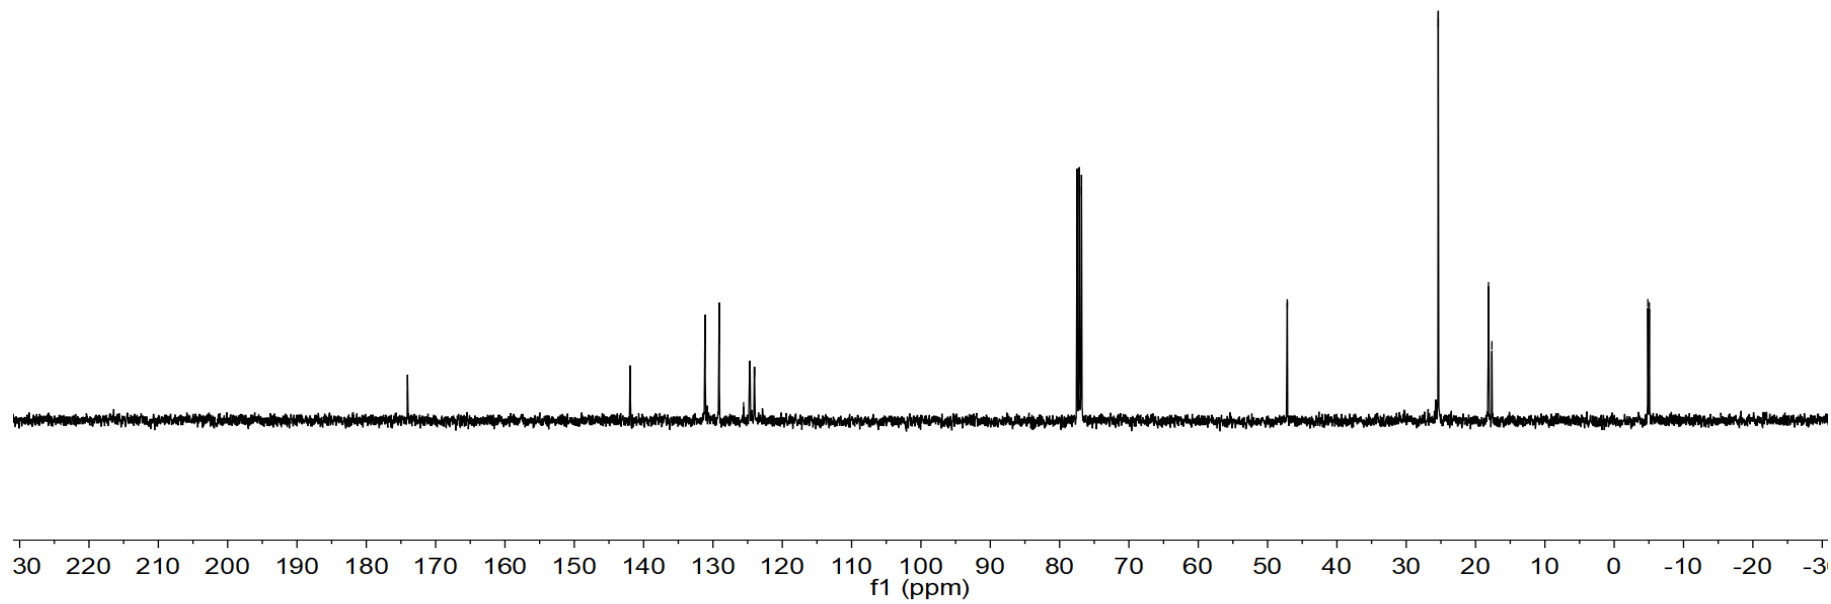

<sup>1</sup>H NMR Spectra (400 MHz, CDCl<sub>3</sub>) of **3r**

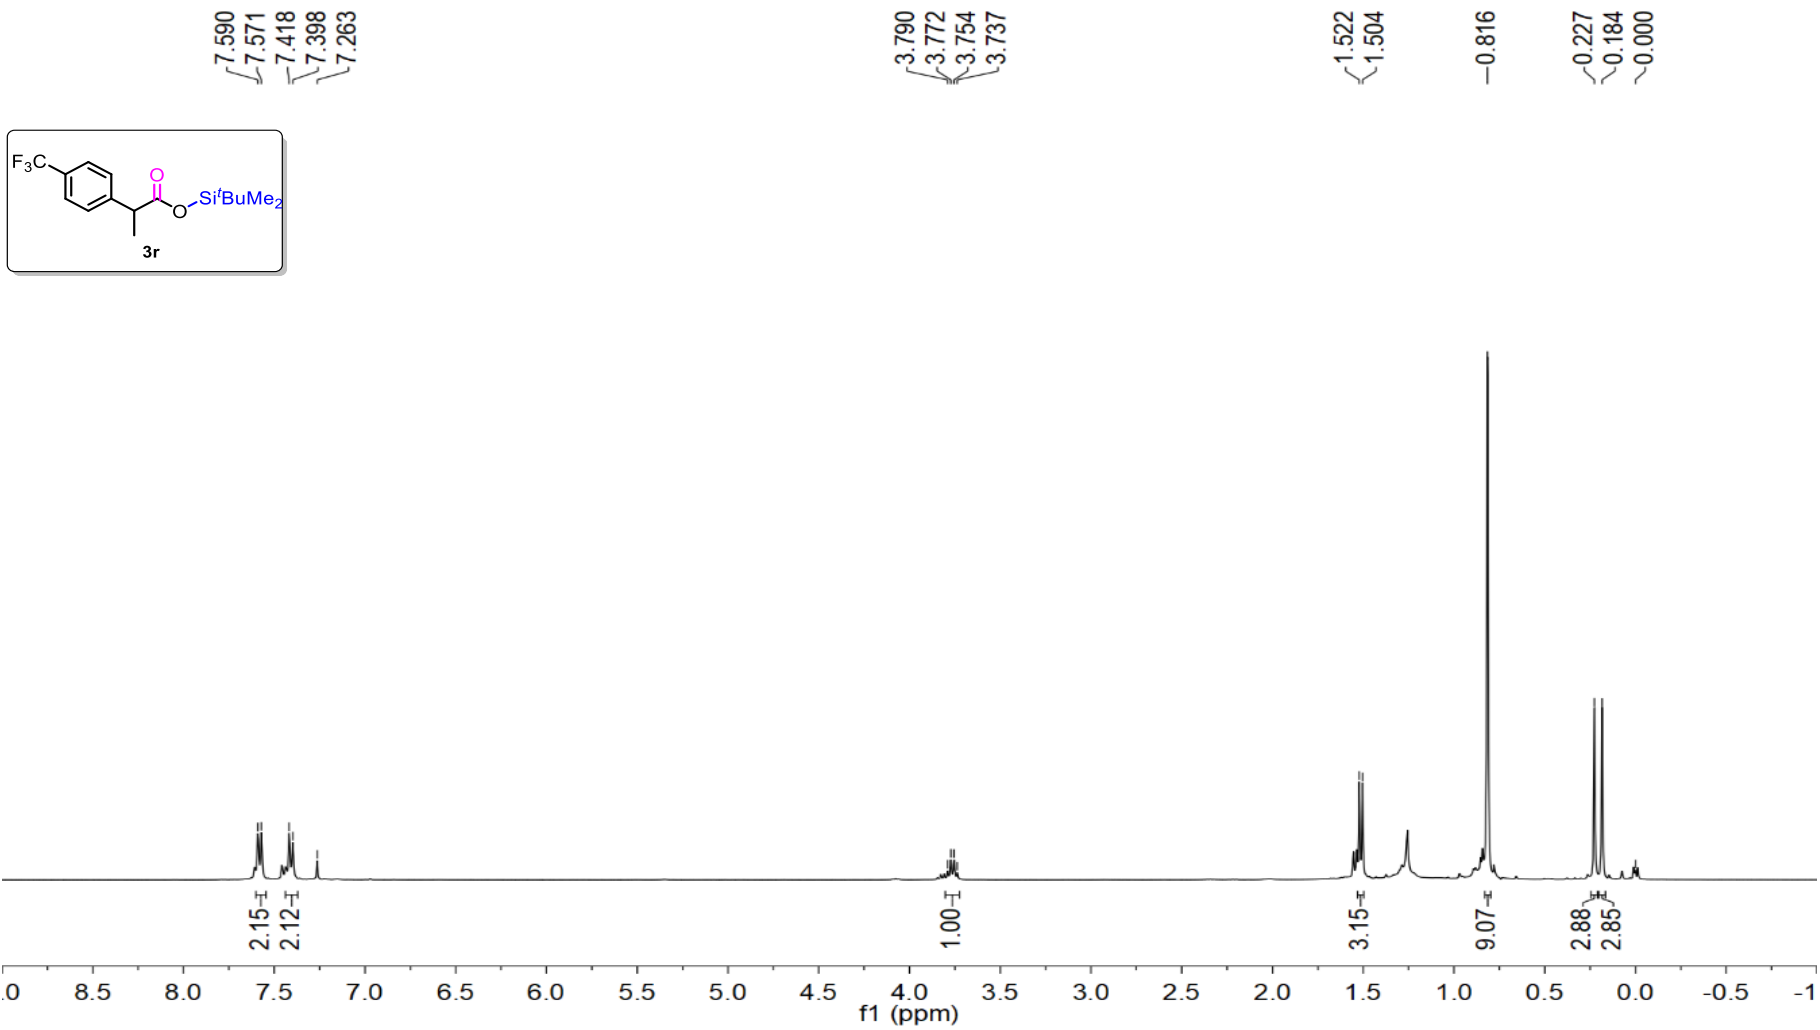

<sup>13</sup>C NMR Spectra (101 MHz, CDCl<sub>3</sub>) of **3r**

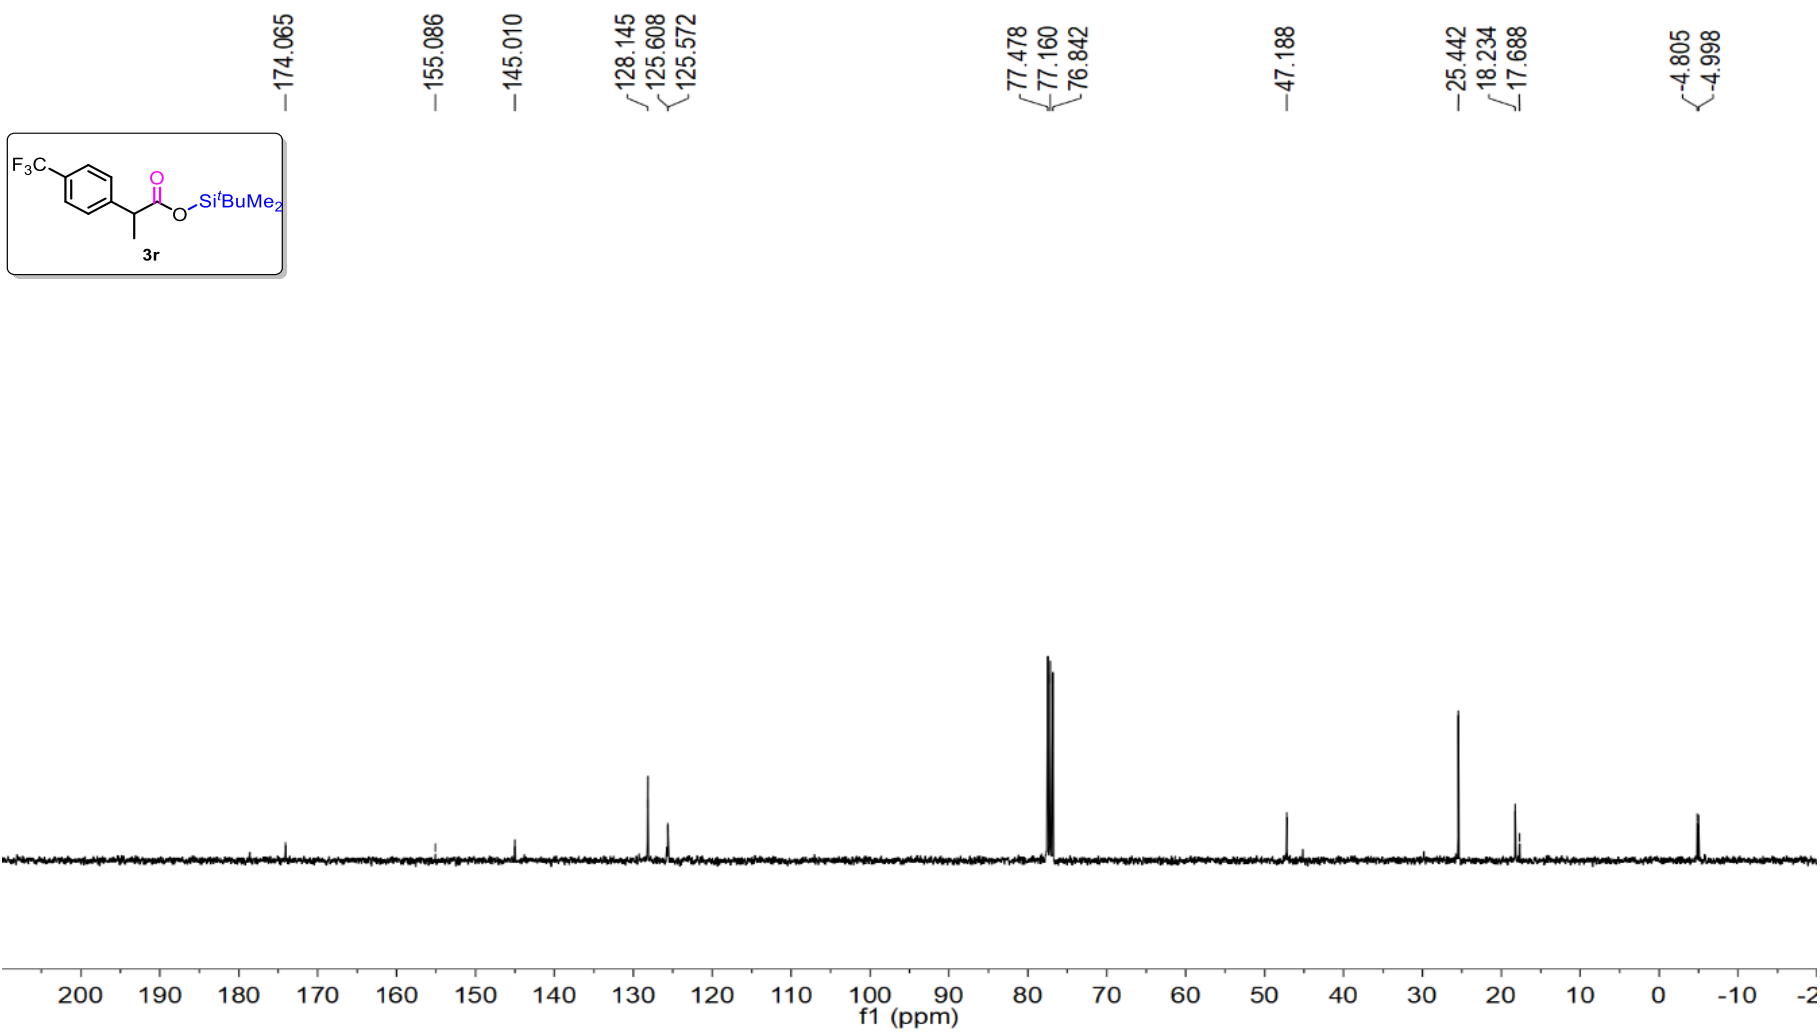



<sup>1</sup>H NMR Spectra (400 MHz, CDCl<sub>3</sub>) of **3s'**

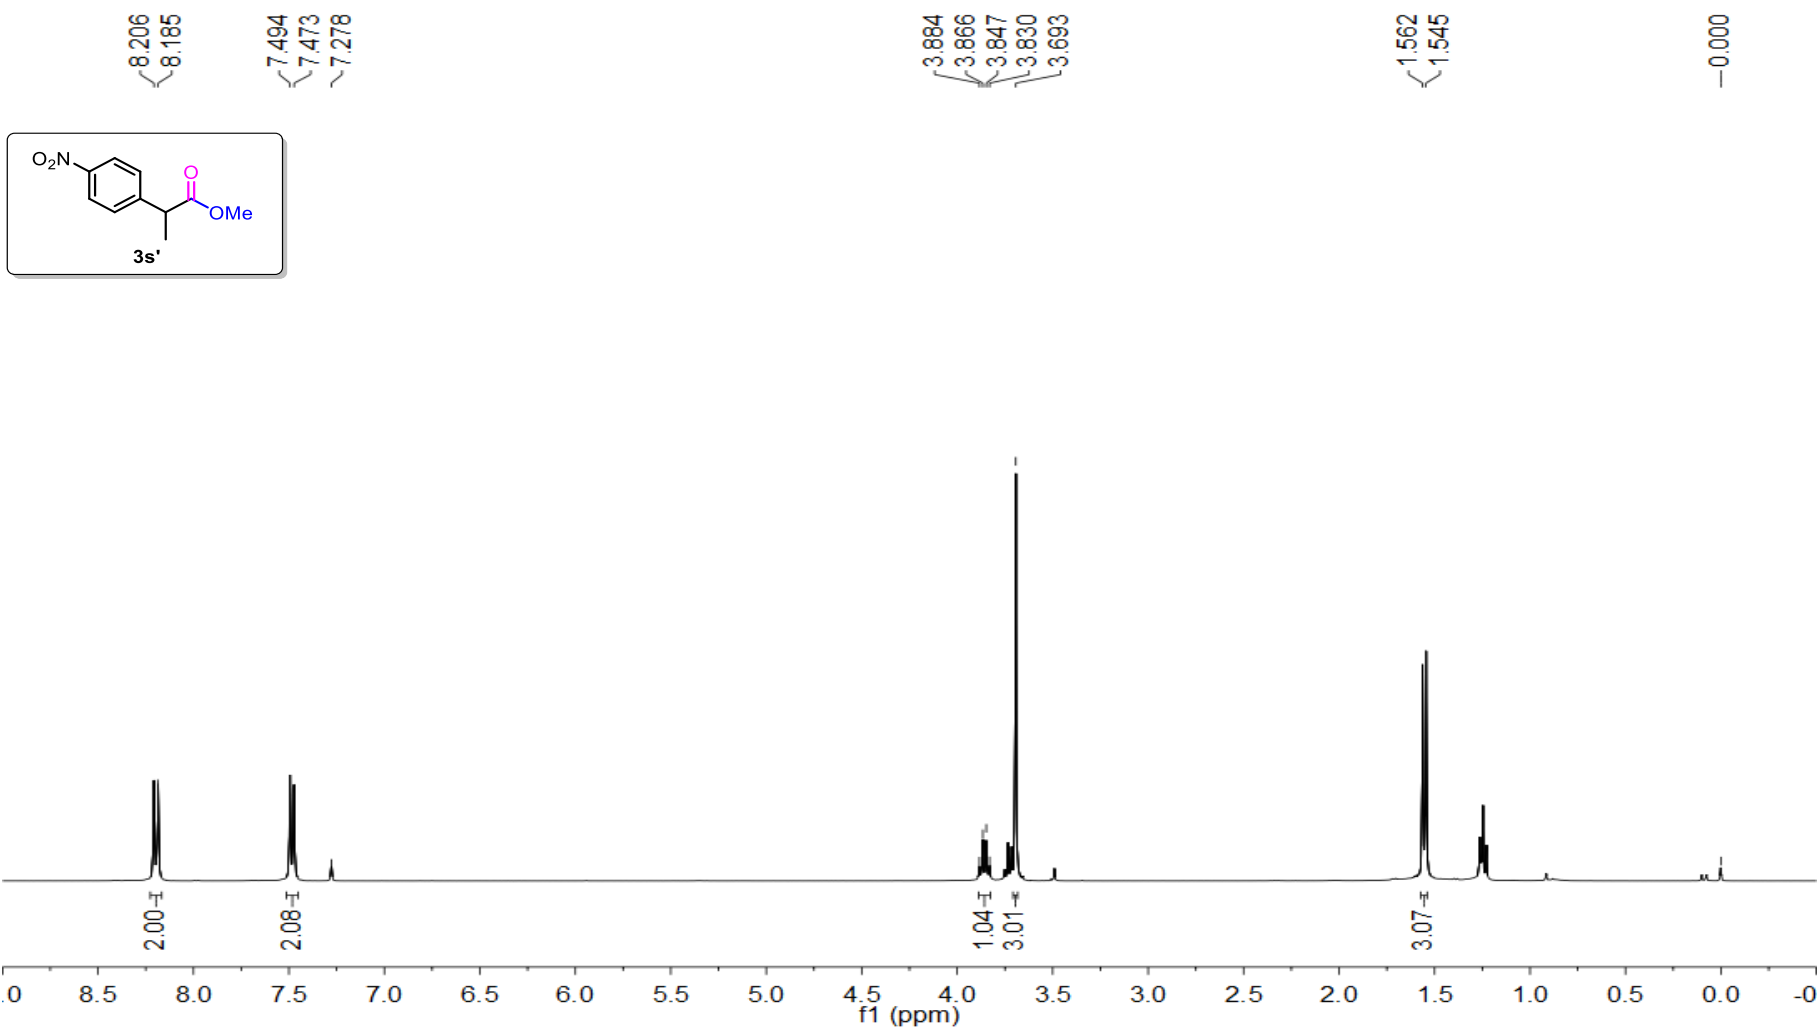

$^{13}\text{C}$  NMR Spectra (101 MHz,  $\text{CDCl}_3$ ) of **3s'**

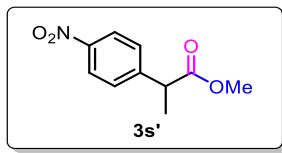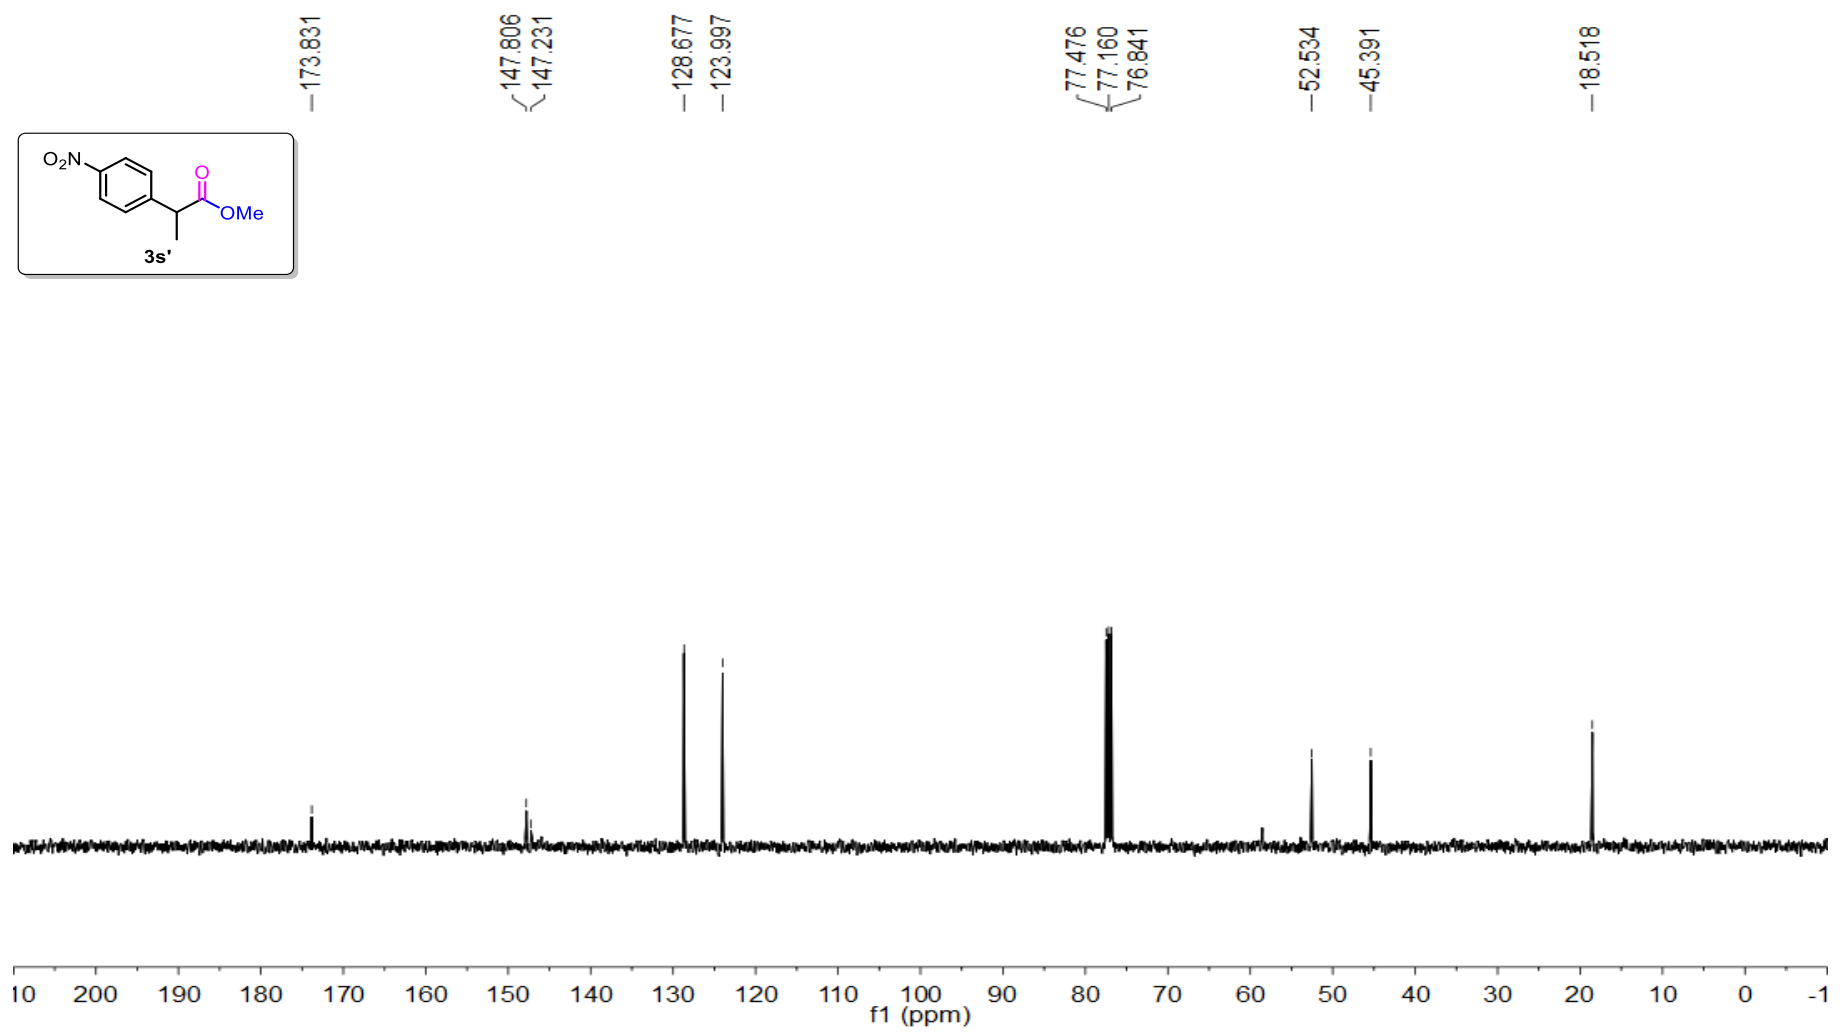

<sup>1</sup>H NMR Spectra (400 MHz, CDCl<sub>3</sub>) of **3t**

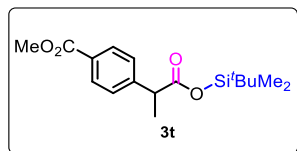

8.003  
7.982

7.370  
7.349  
7.266

3.912  
3.782  
3.764  
3.746  
3.728

1.512  
1.499

-0.805

-0.217  
-0.170  
-0.001

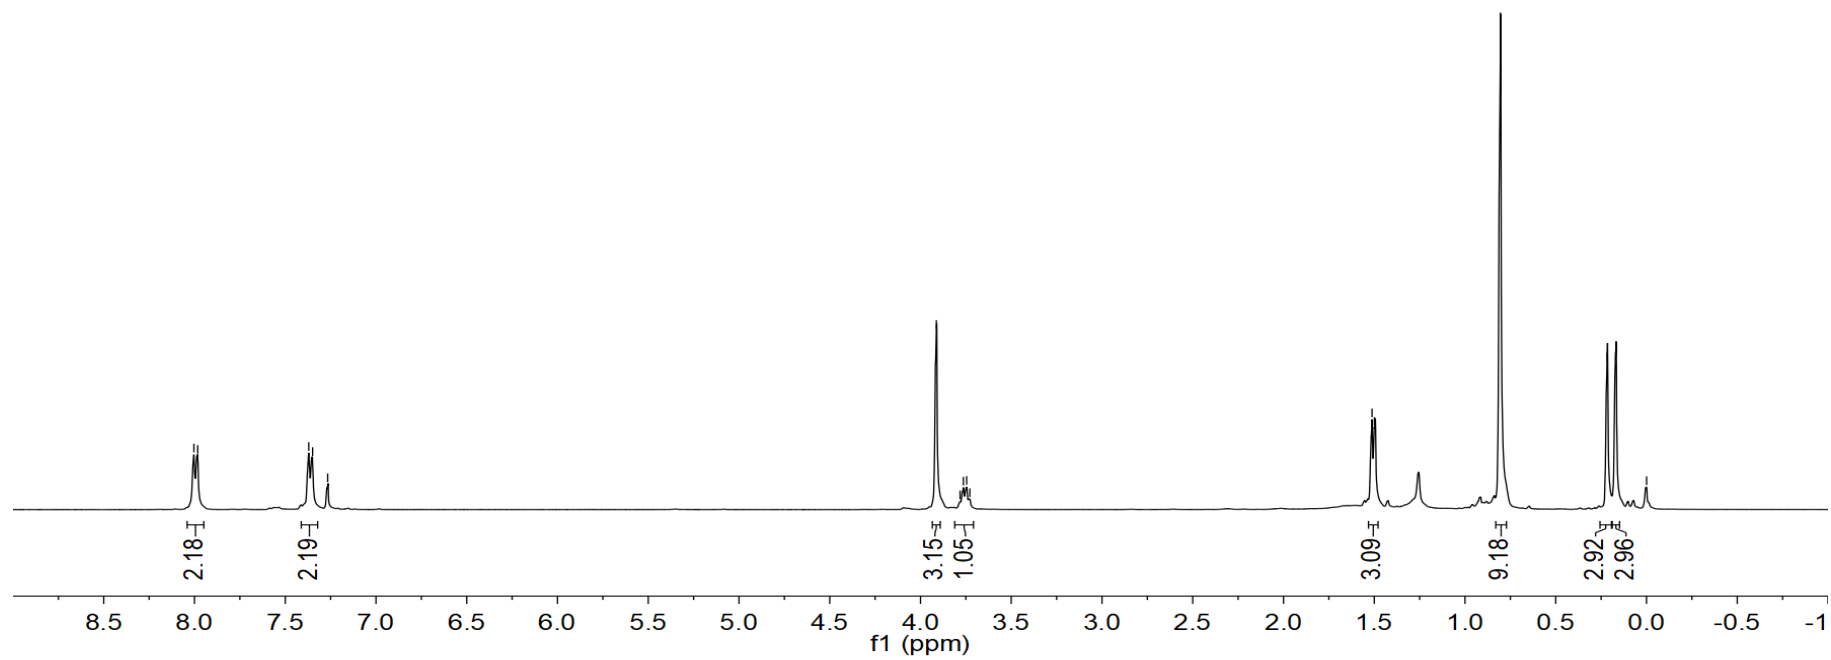

<sup>13</sup>C NMR Spectra (101 MHz, CDCl<sub>3</sub>) of **3t**

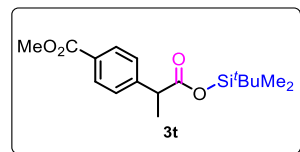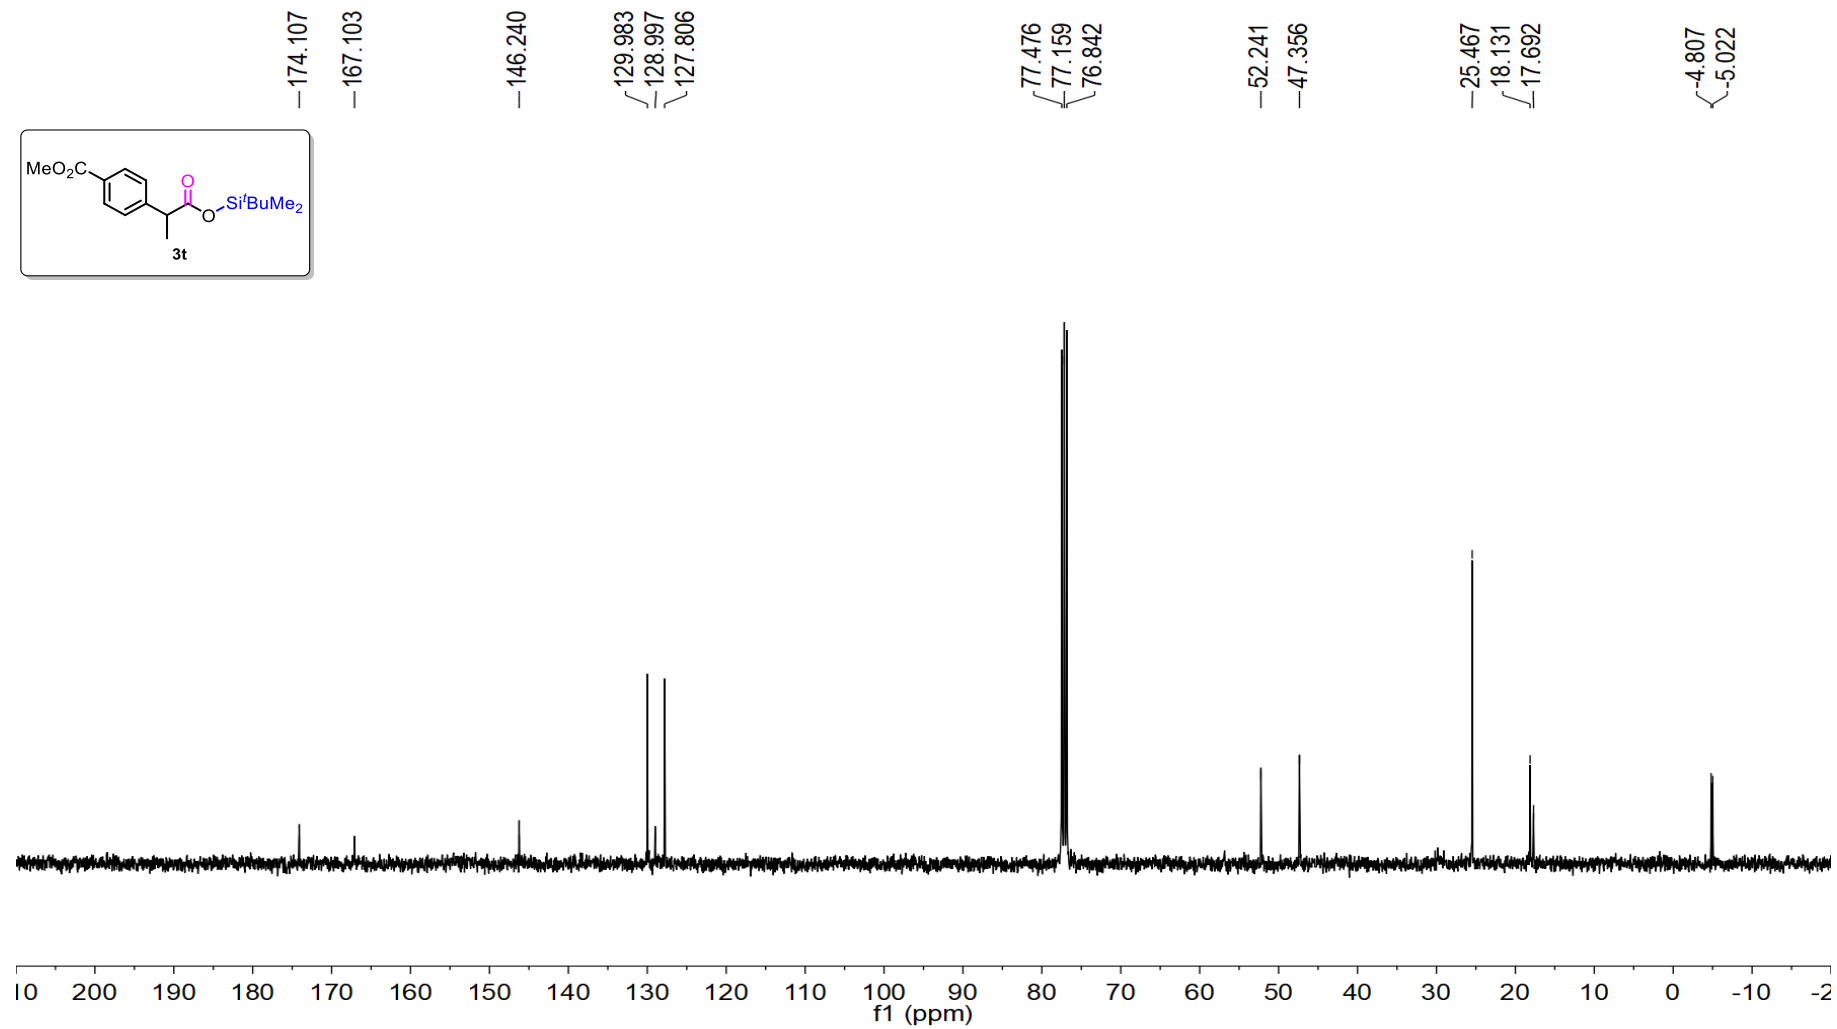

<sup>1</sup>H NMR Spectra (400 MHz, CDCl<sub>3</sub>) of **3u'**

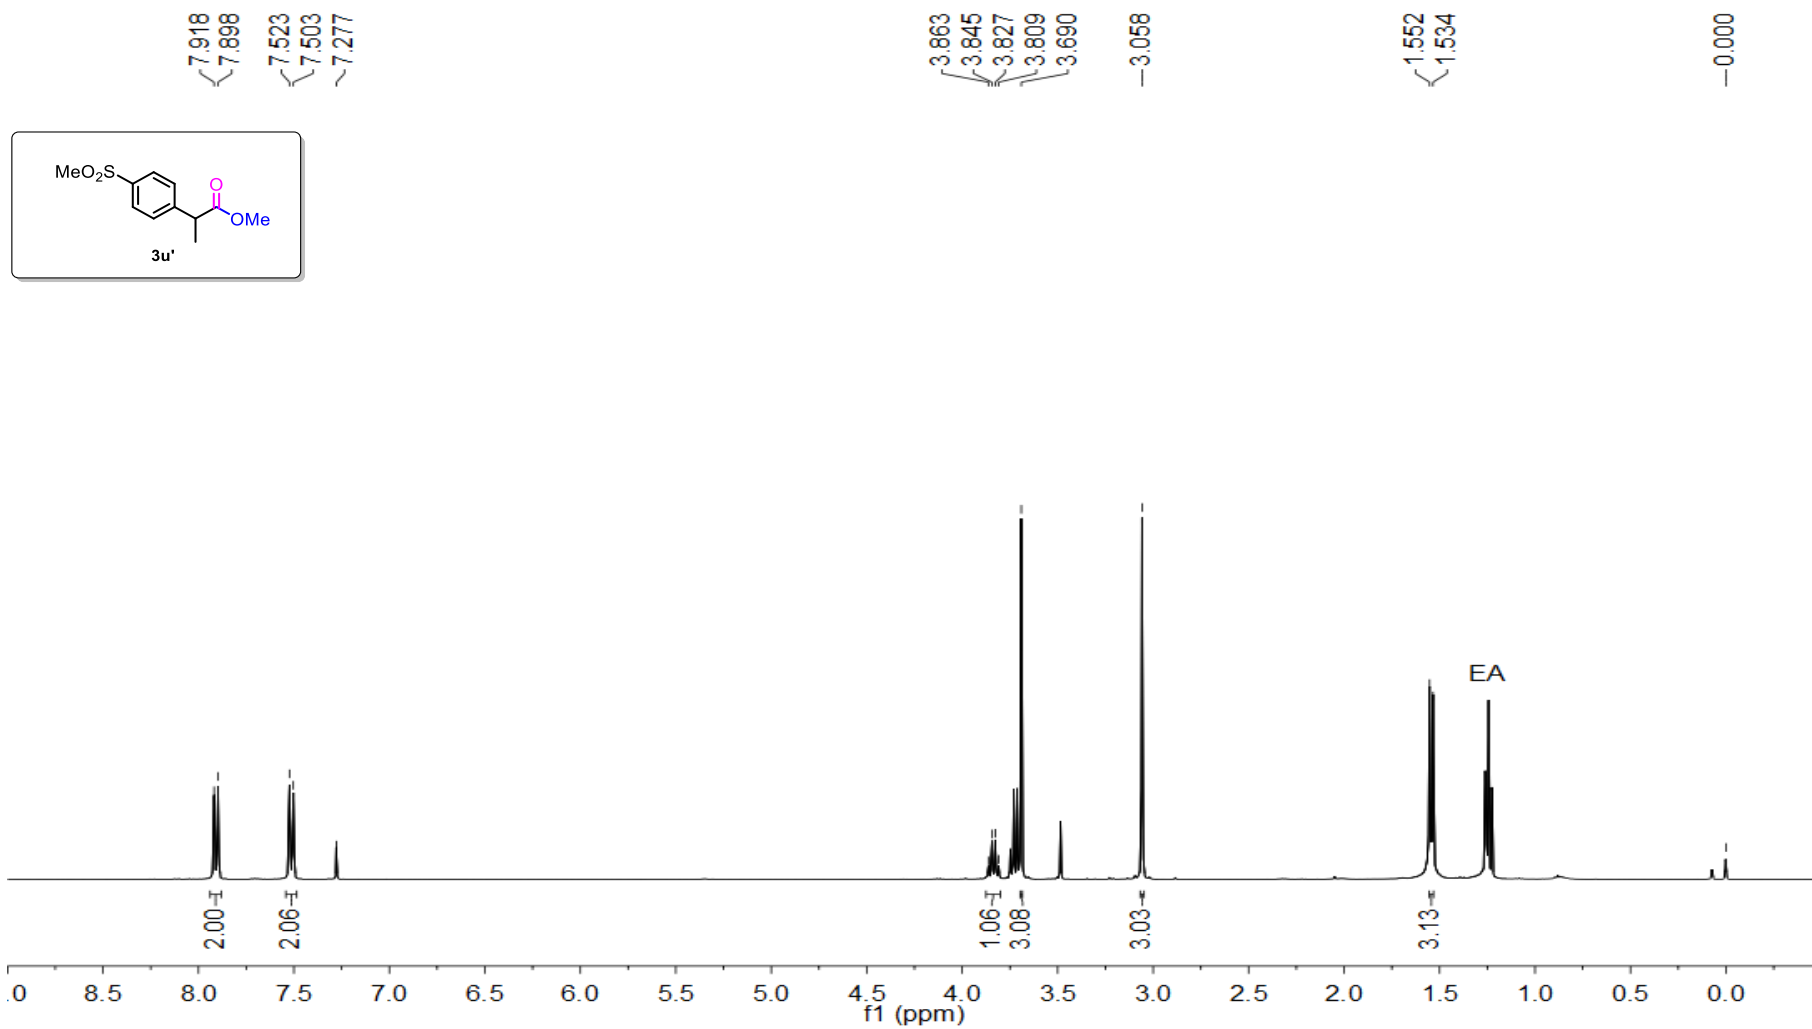

<sup>13</sup>C NMR Spectra (101 MHz, CDCl<sub>3</sub>) of **3u'**

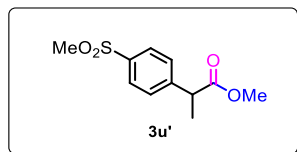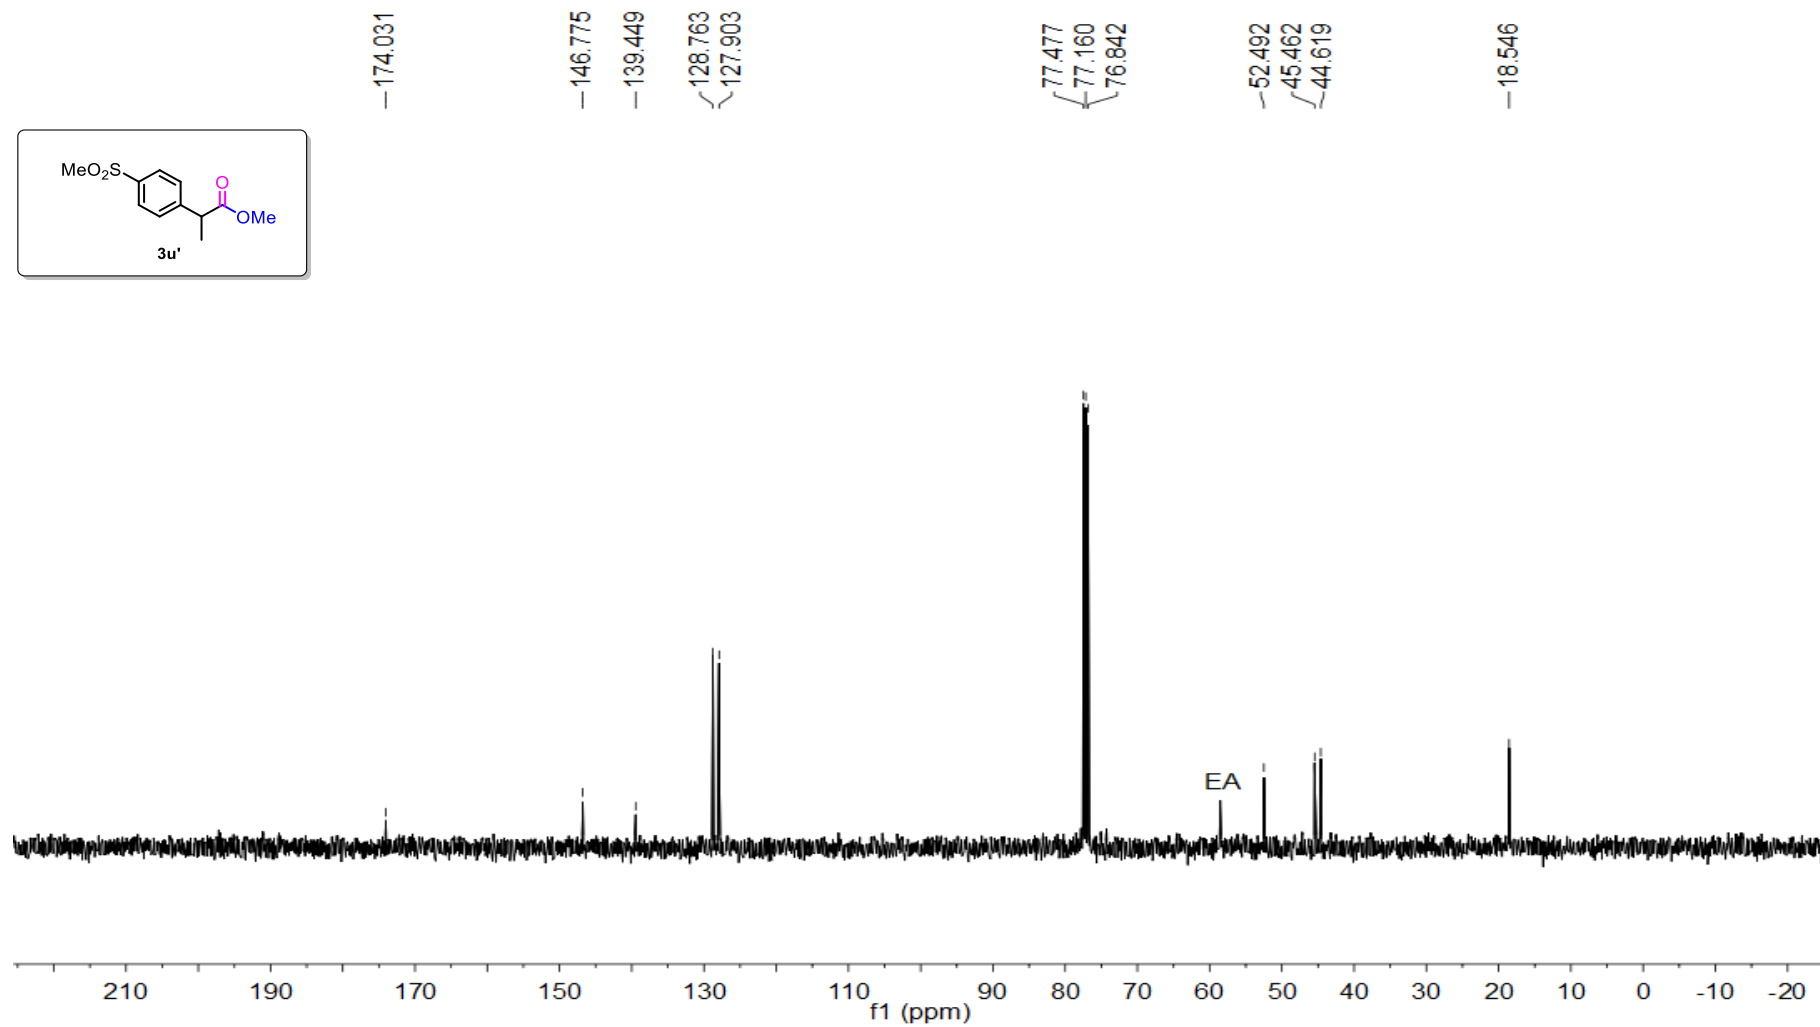

<sup>1</sup>H NMR Spectra (400 MHz, CDCl<sub>3</sub>) of **3v**

8.123  
8.102  
7.877  
7.857  
7.777  
7.765  
7.753  
7.550  
7.532  
7.513  
7.500  
7.481  
7.461  
7.449

4.504  
4.485  
4.468  
4.450

1.692  
1.674

-0.664

0.190  
0.152  
0.000

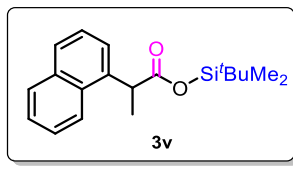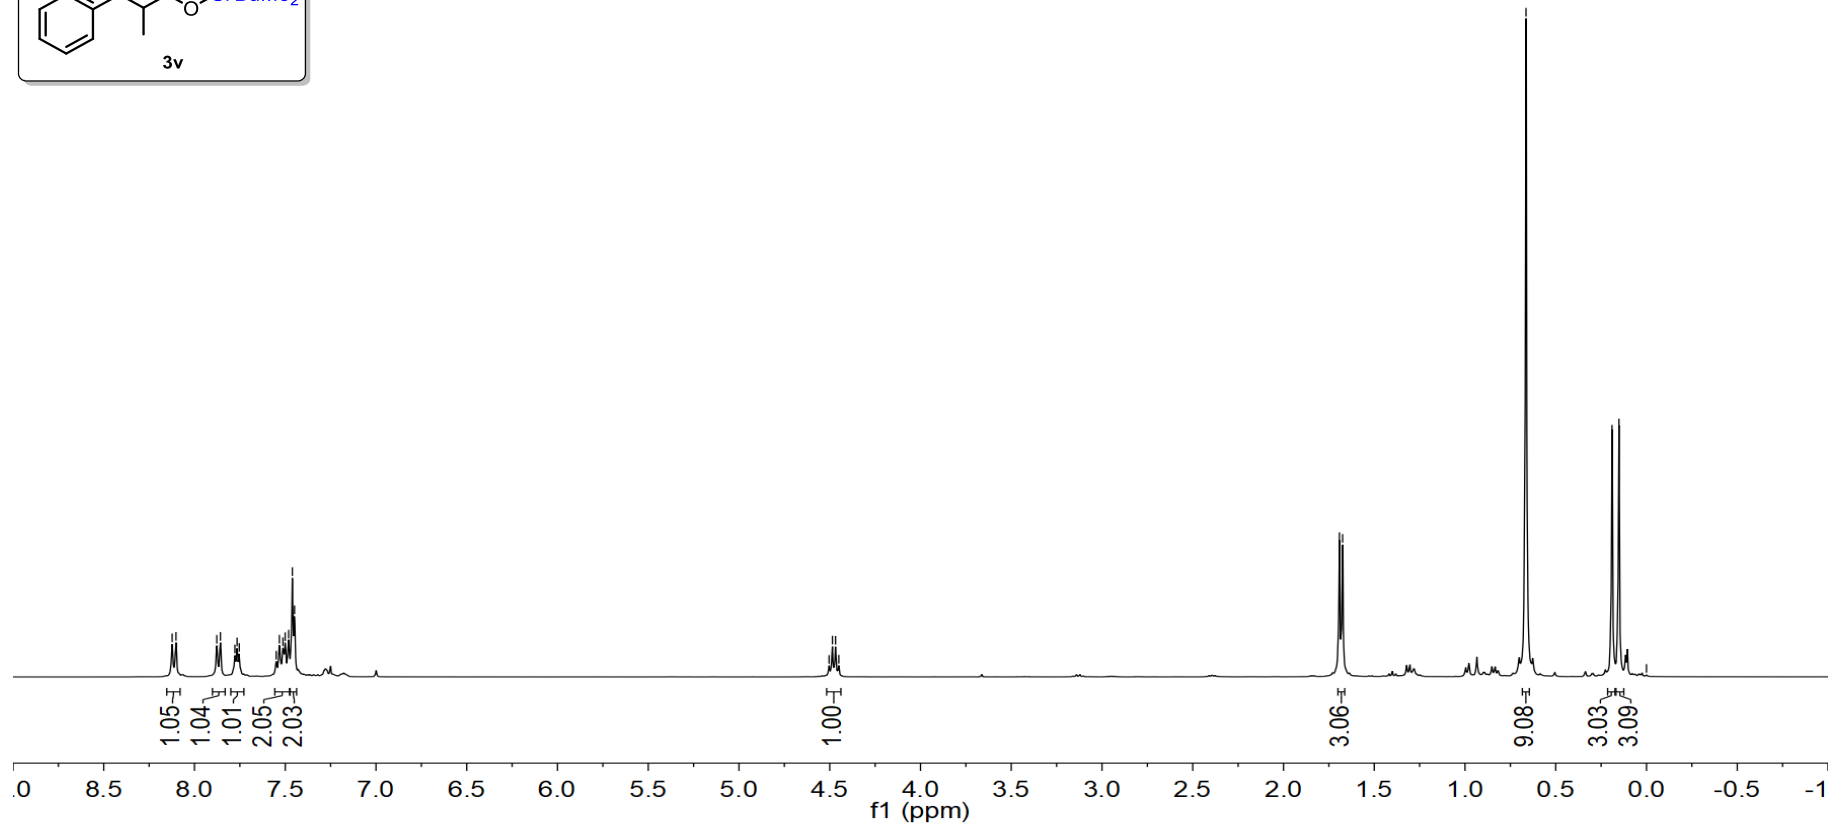

<sup>13</sup>C NMR Spectra (101 MHz, CDCl<sub>3</sub>) of **3v**

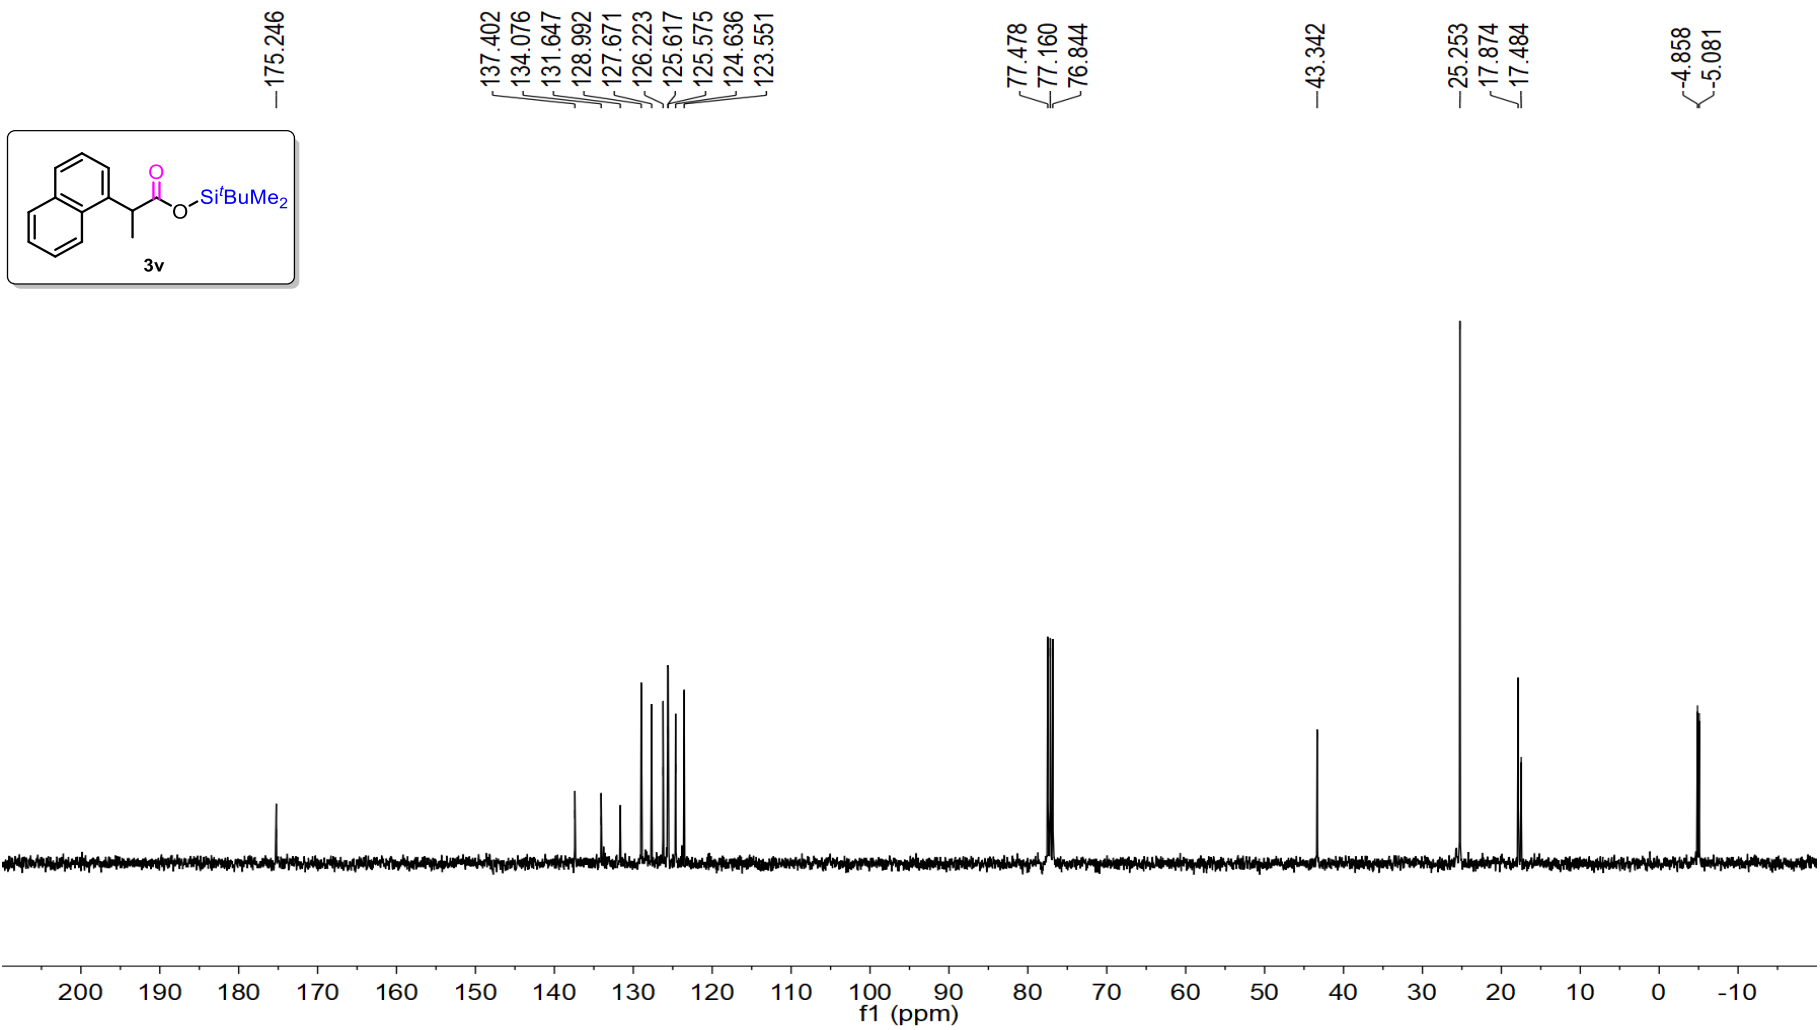



<sup>1</sup>H NMR Spectra (400 MHz, CDCl<sub>3</sub>) of **3w**

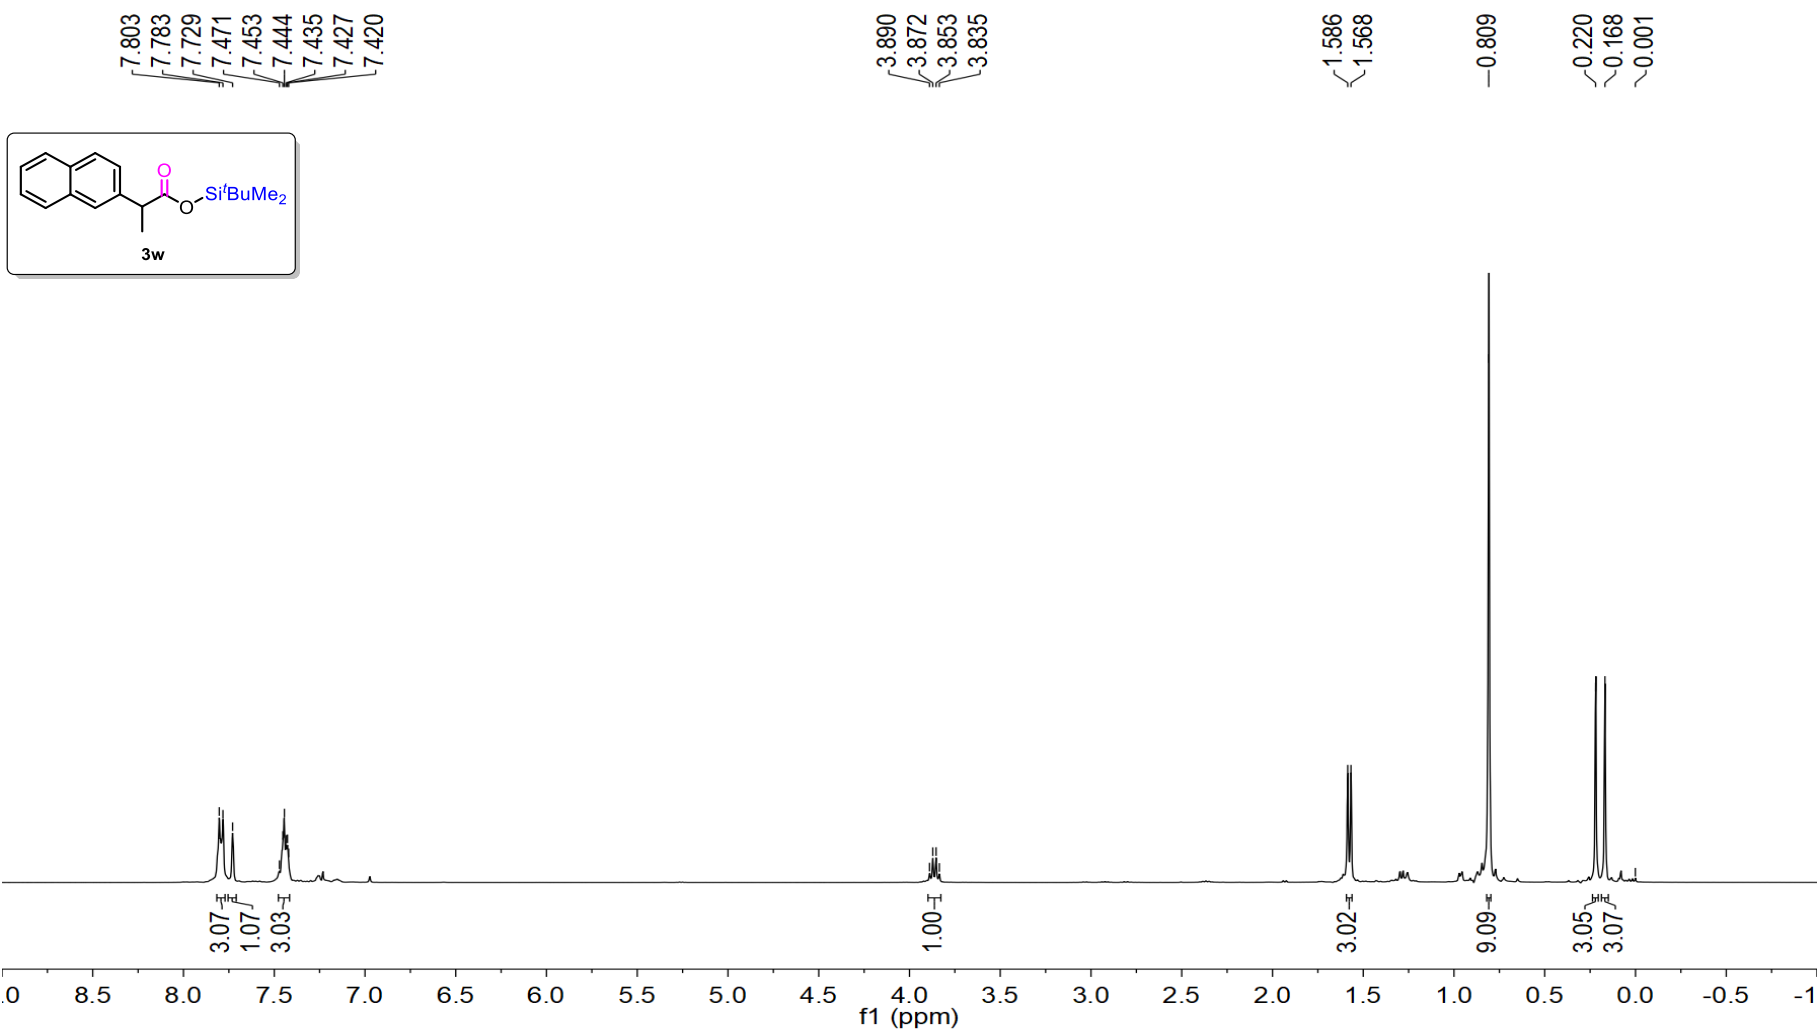

<sup>13</sup>C NMR Spectra (101 MHz, CDCl<sub>3</sub>) of **3w**

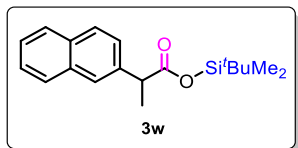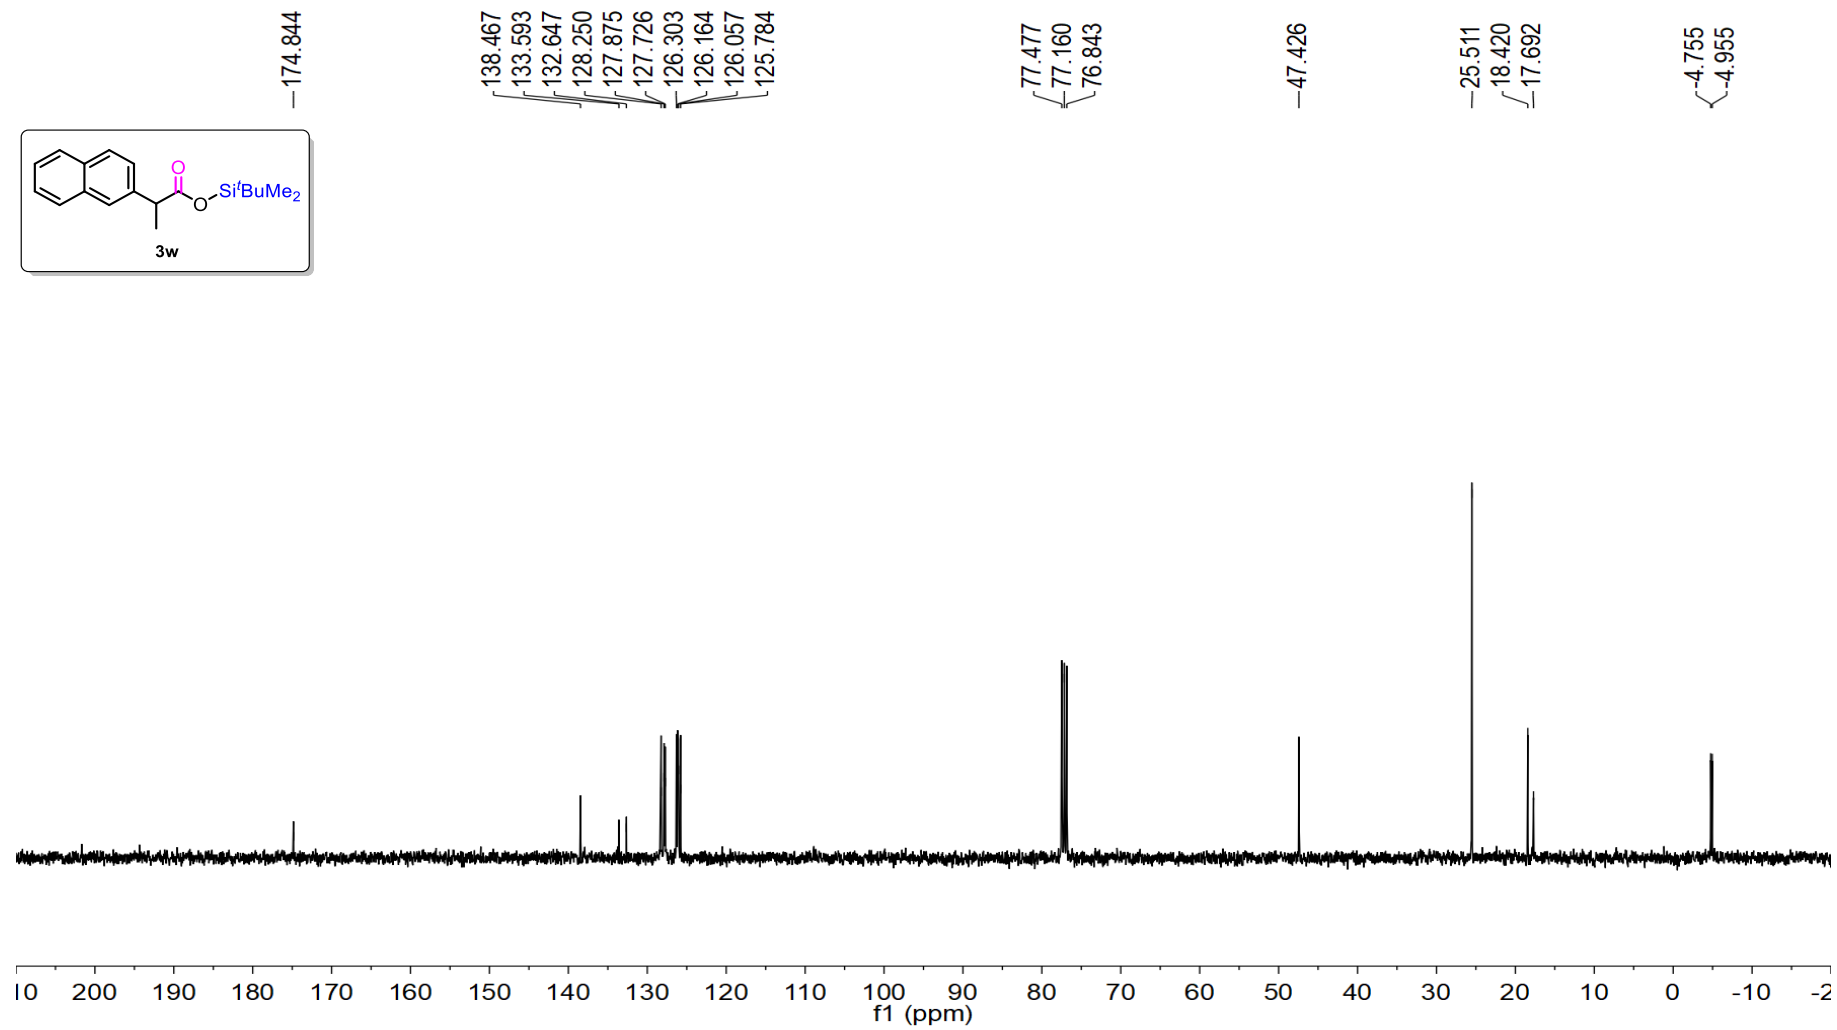

<sup>1</sup>H NMR Spectra (400 MHz, CDCl<sub>3</sub>) of **3x**

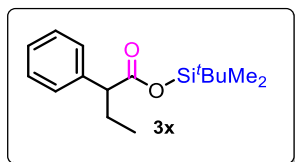

7.319  
7.284  
7.243  
7.228

3.440  
3.421  
3.403  
2.147  
2.129  
2.111  
2.094  
2.076  
2.058  
2.038  
1.841  
1.822  
1.804  
1.786  
1.768  
1.751  
1.733  
0.918  
0.903  
0.885  
0.837  
0.208  
0.176  
0.000

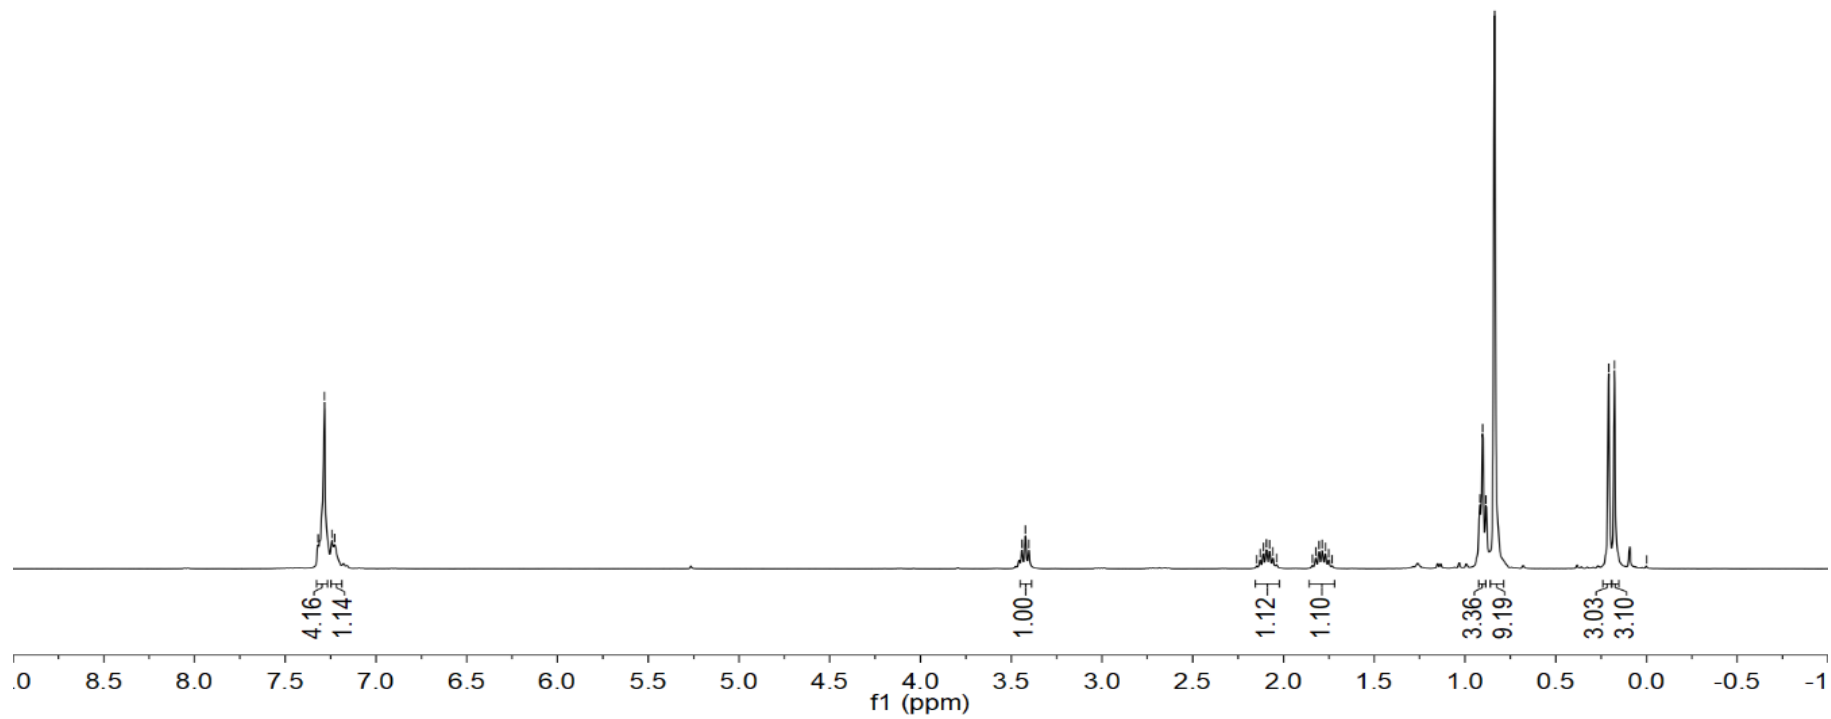

<sup>13</sup>C NMR Spectra (101 MHz, CDCl<sub>3</sub>) of **3x**

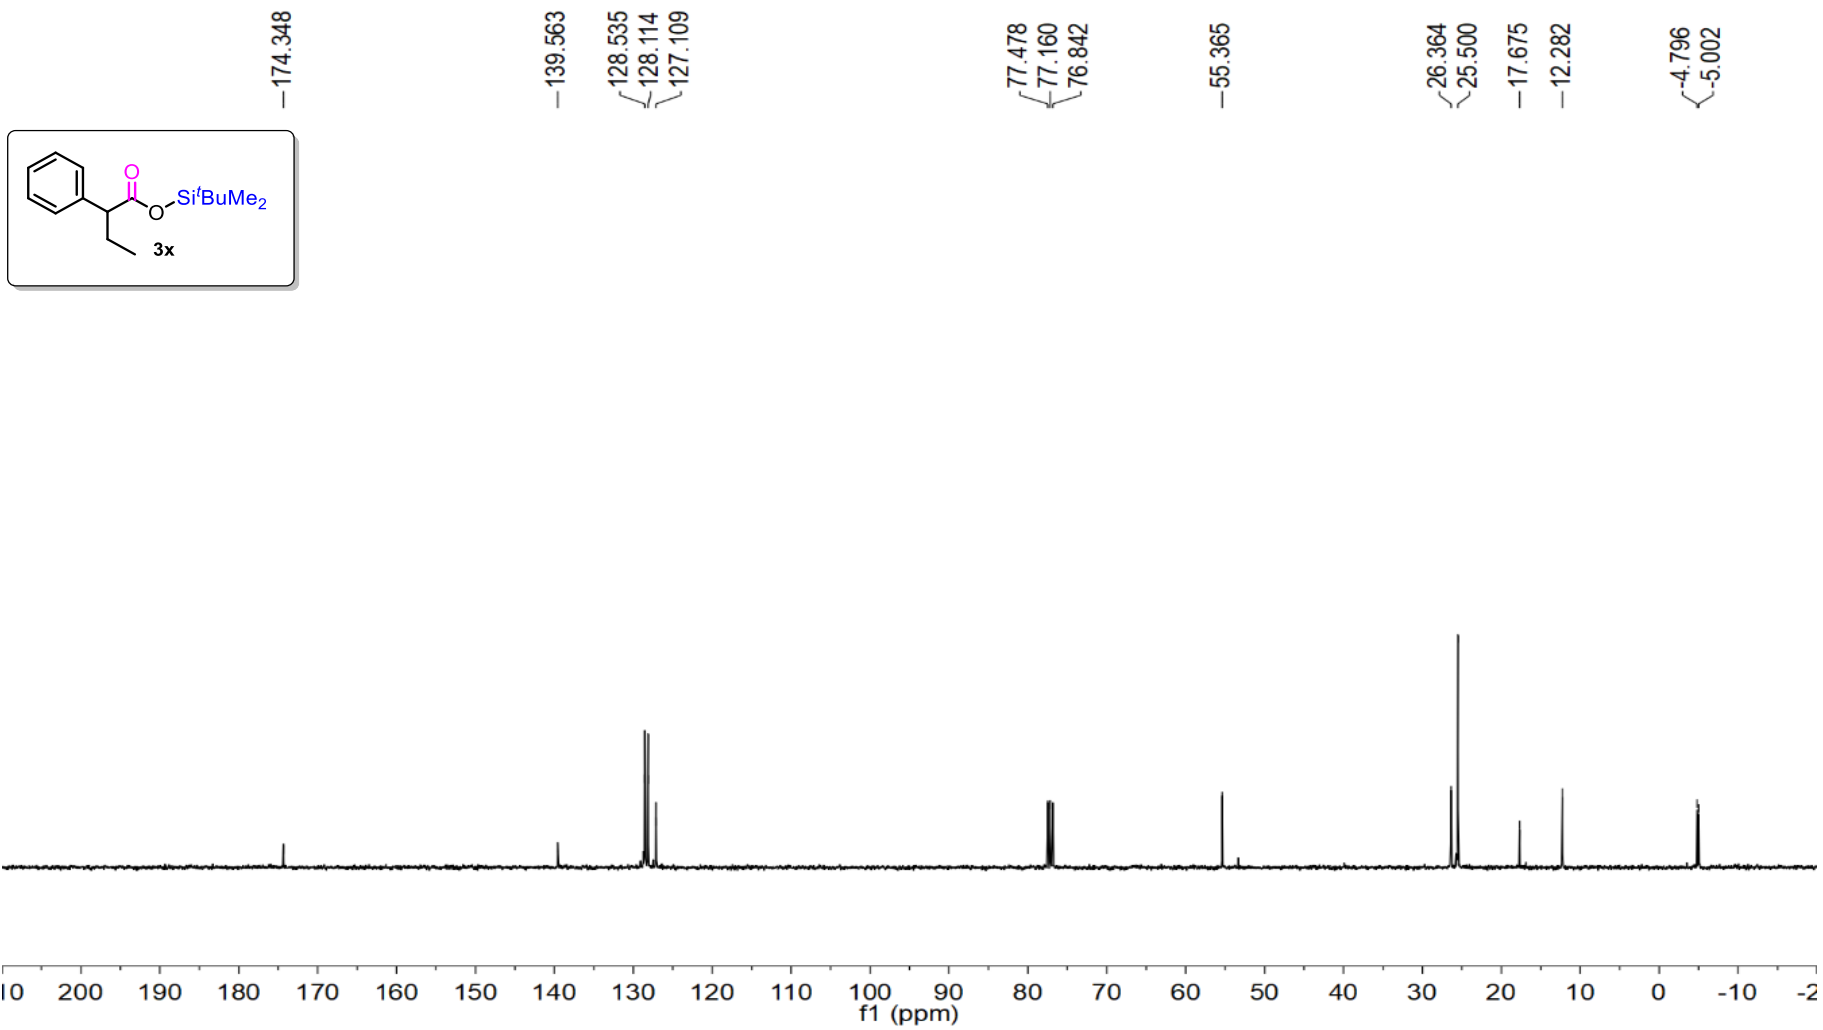

<sup>1</sup>H NMR Spectra (400 MHz, CDCl<sub>3</sub>) of **3y**

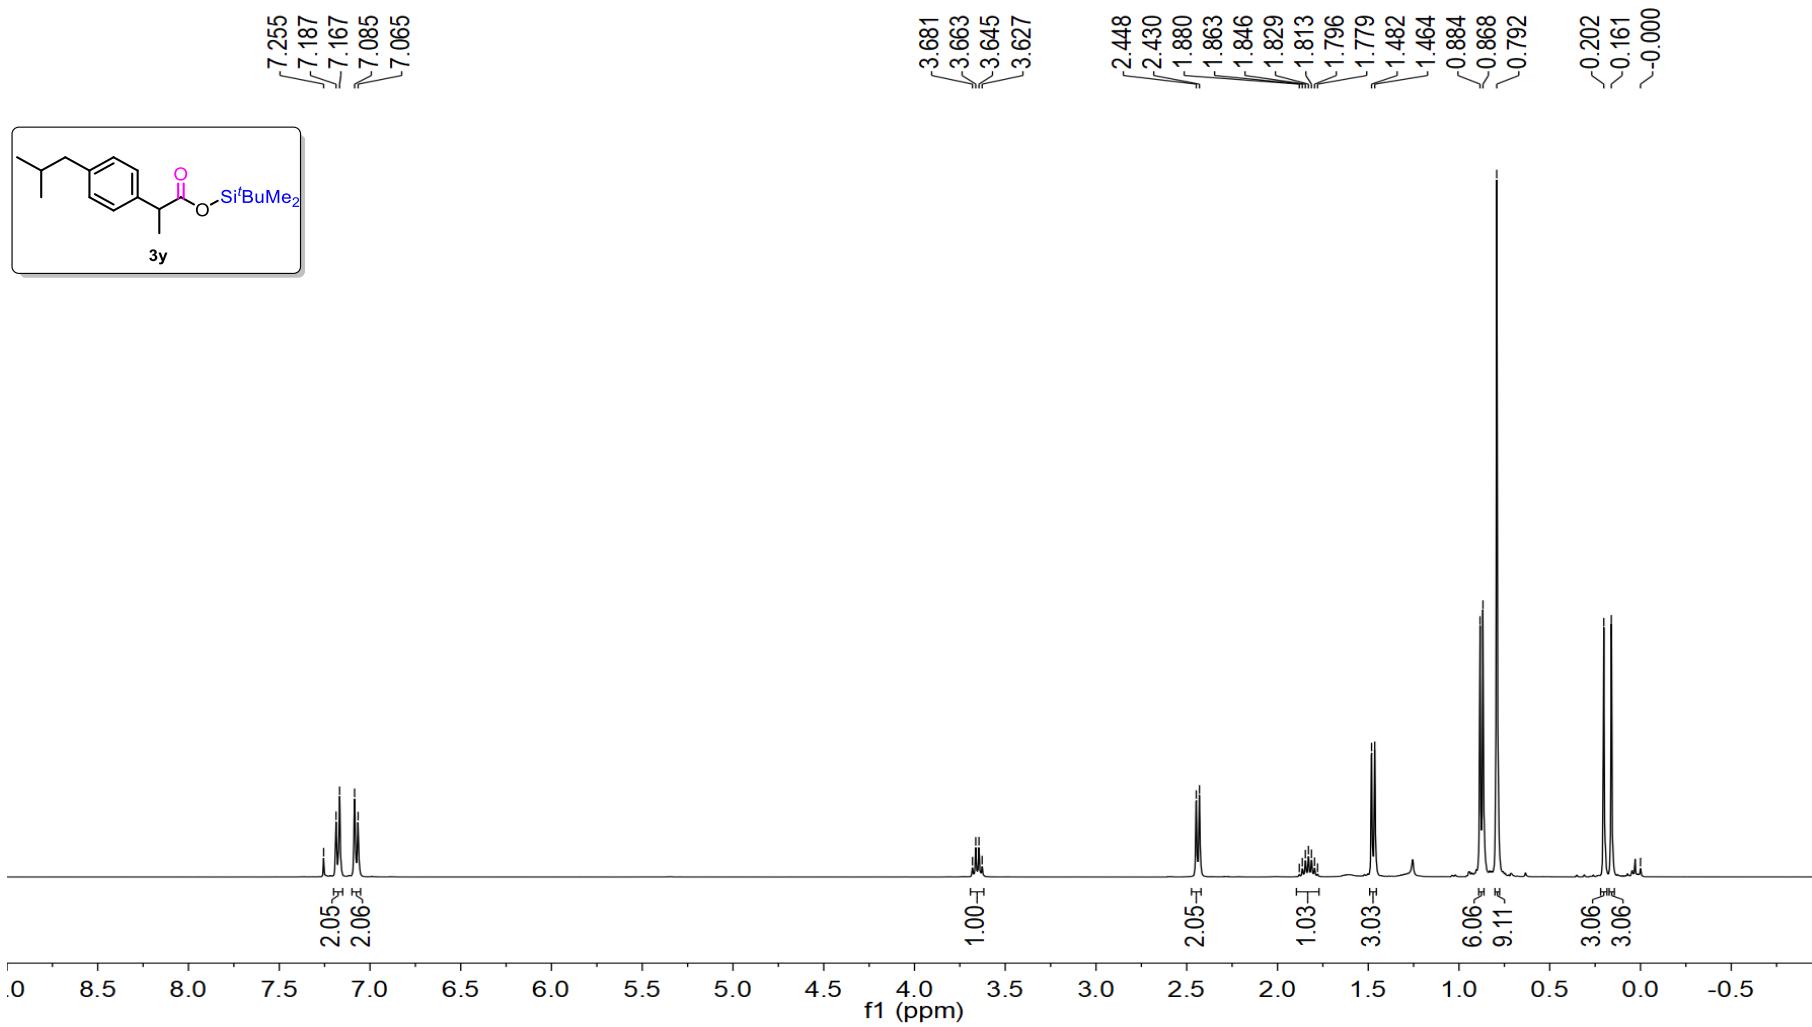

<sup>13</sup>C NMR Spectra (101 MHz, CDCl<sub>3</sub>) of **3y**

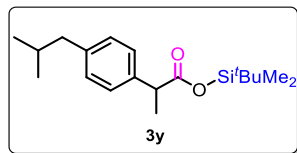

— 175.098

~ 140.450  
~ 138.323

~ 129.319  
~ 127.404

~ 77.478  
~ 77.161  
~ 76.843

~ 46.935  
~ 45.150

~ 30.357  
~ 25.472  
~ 22.428  
~ 18.169  
~ 17.706

~ 4.764  
~ 5.005

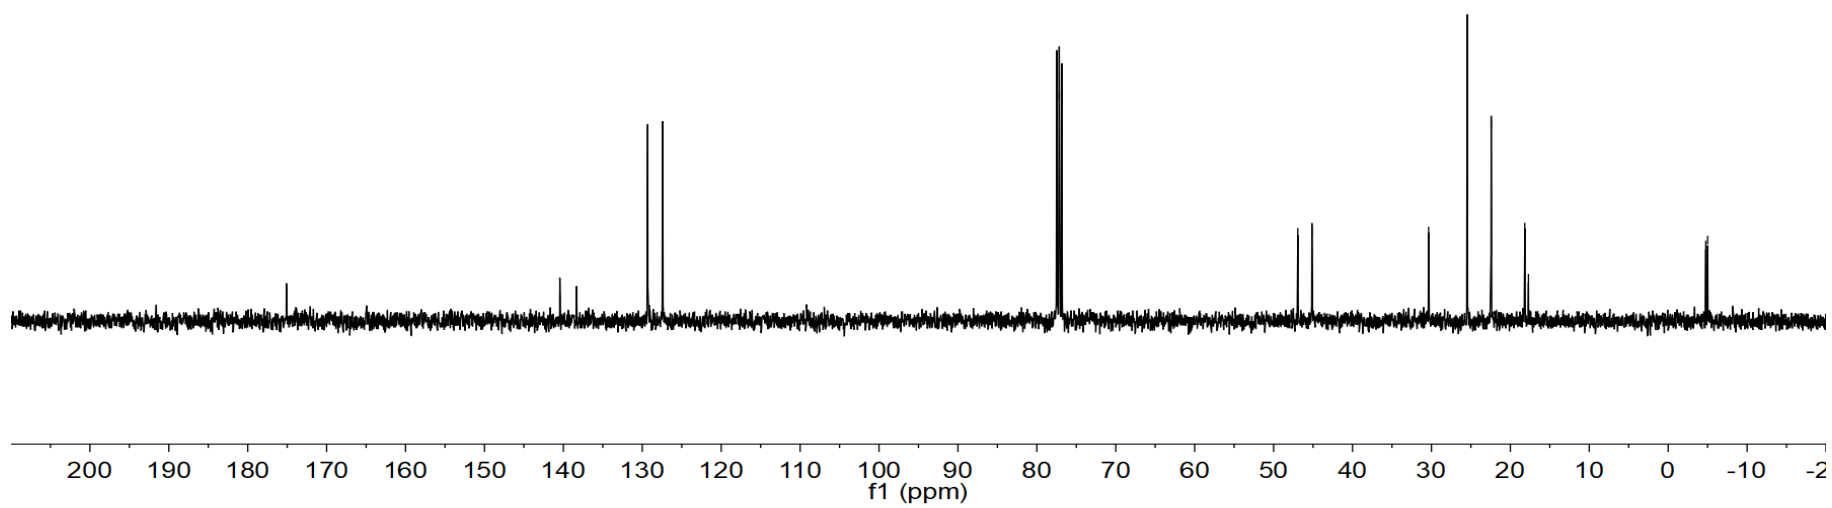

<sup>1</sup>H NMR Spectra (400 MHz, CDCl<sub>3</sub>) of **3z**

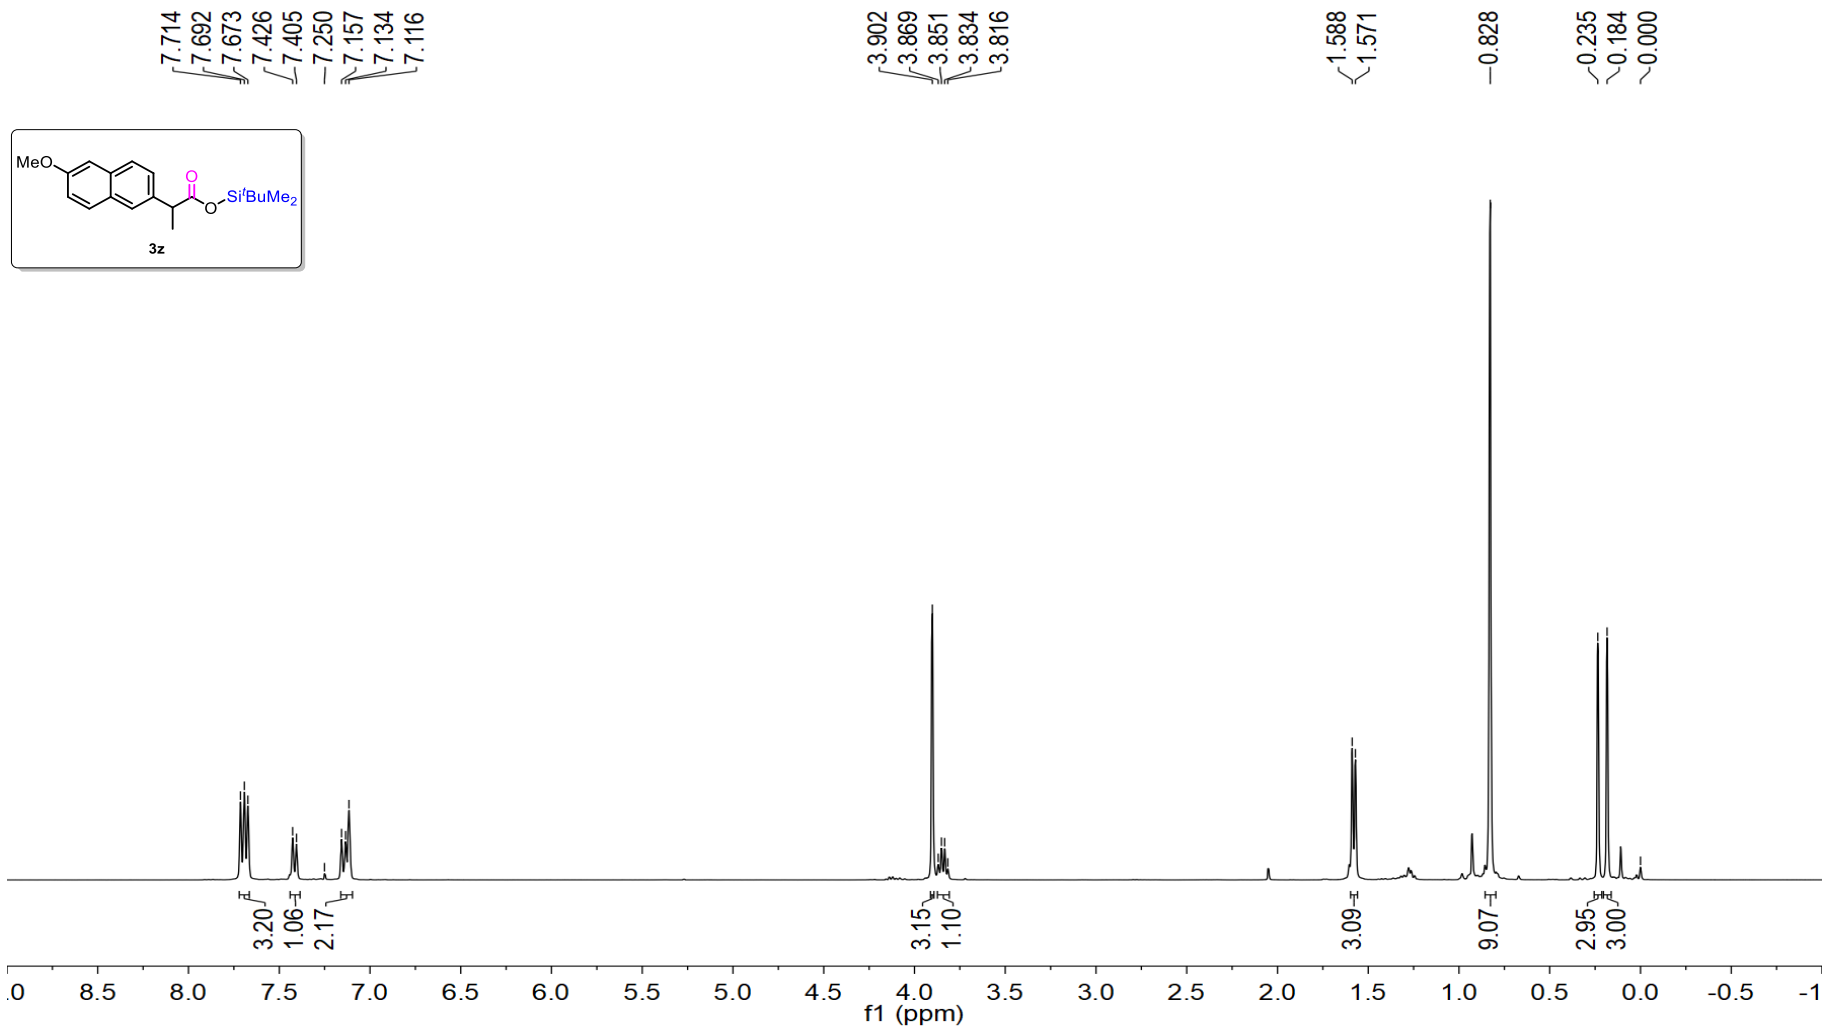

<sup>13</sup>C NMR Spectra (101 MHz, CDCl<sub>3</sub>) of **3z**

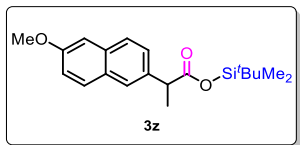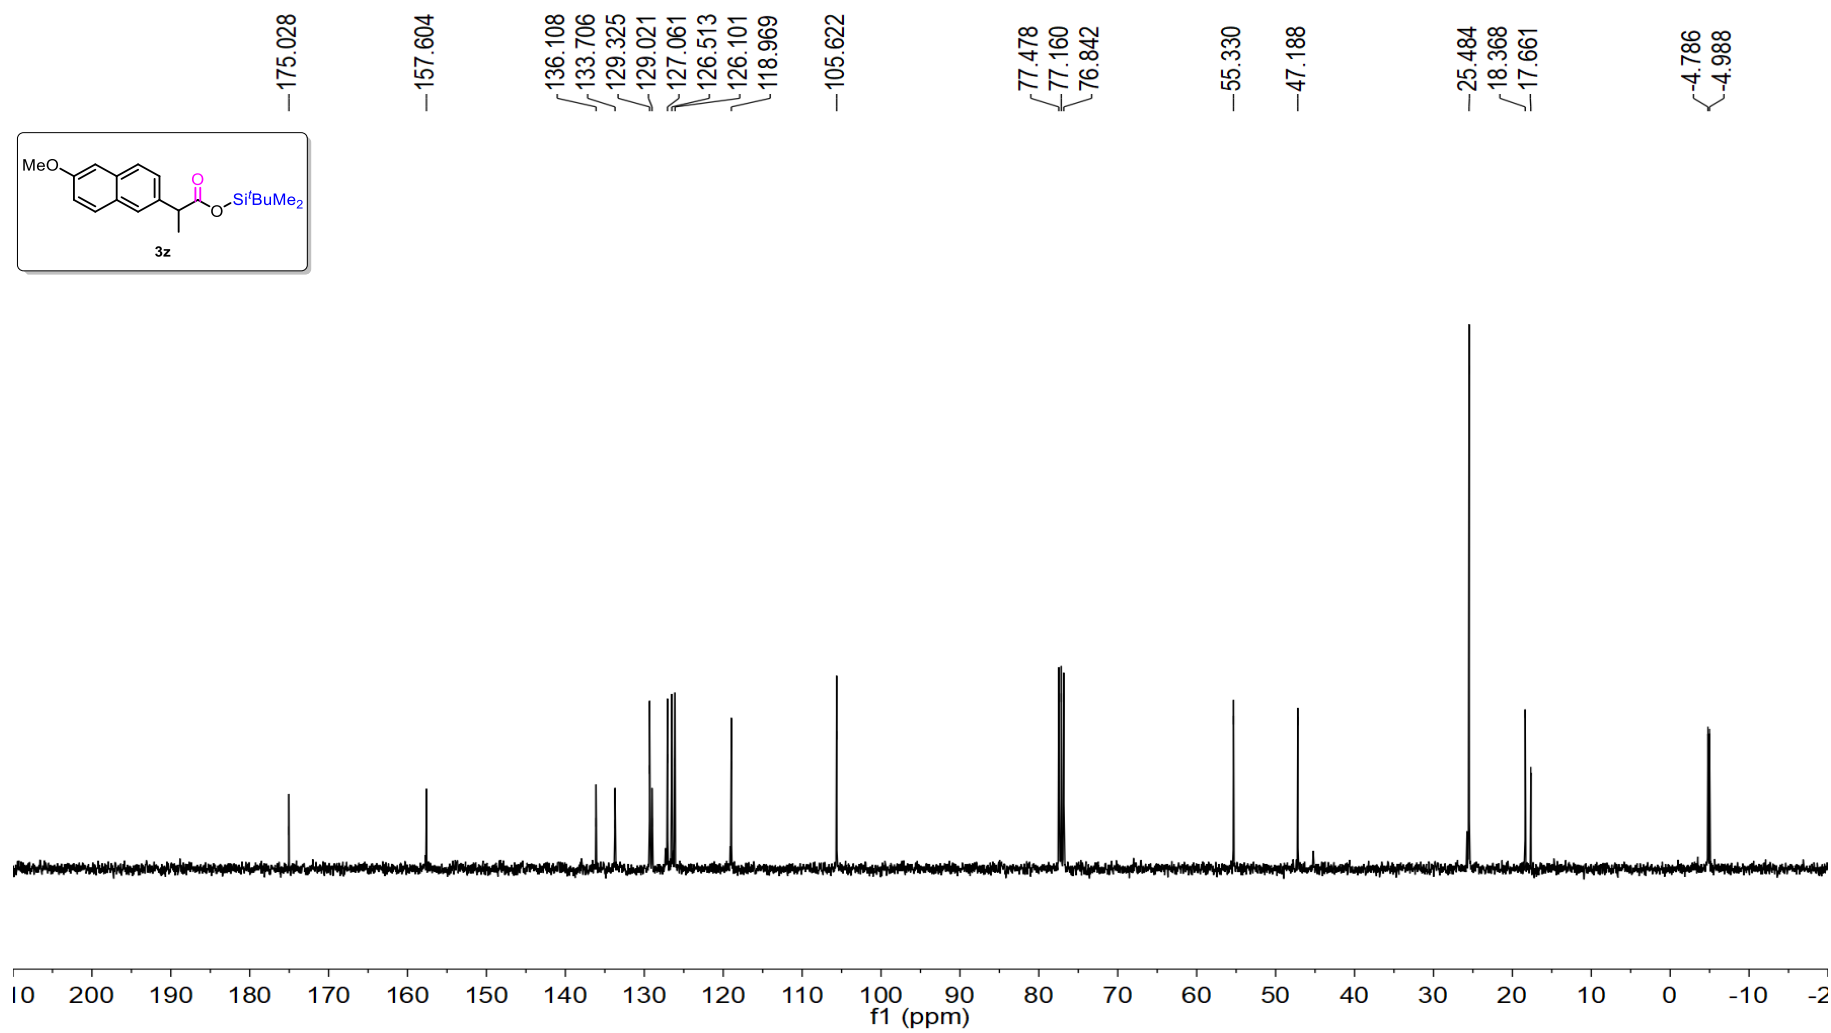



<sup>1</sup>H NMR Spectra (400 MHz, CDCl<sub>3</sub>) of **3aa**

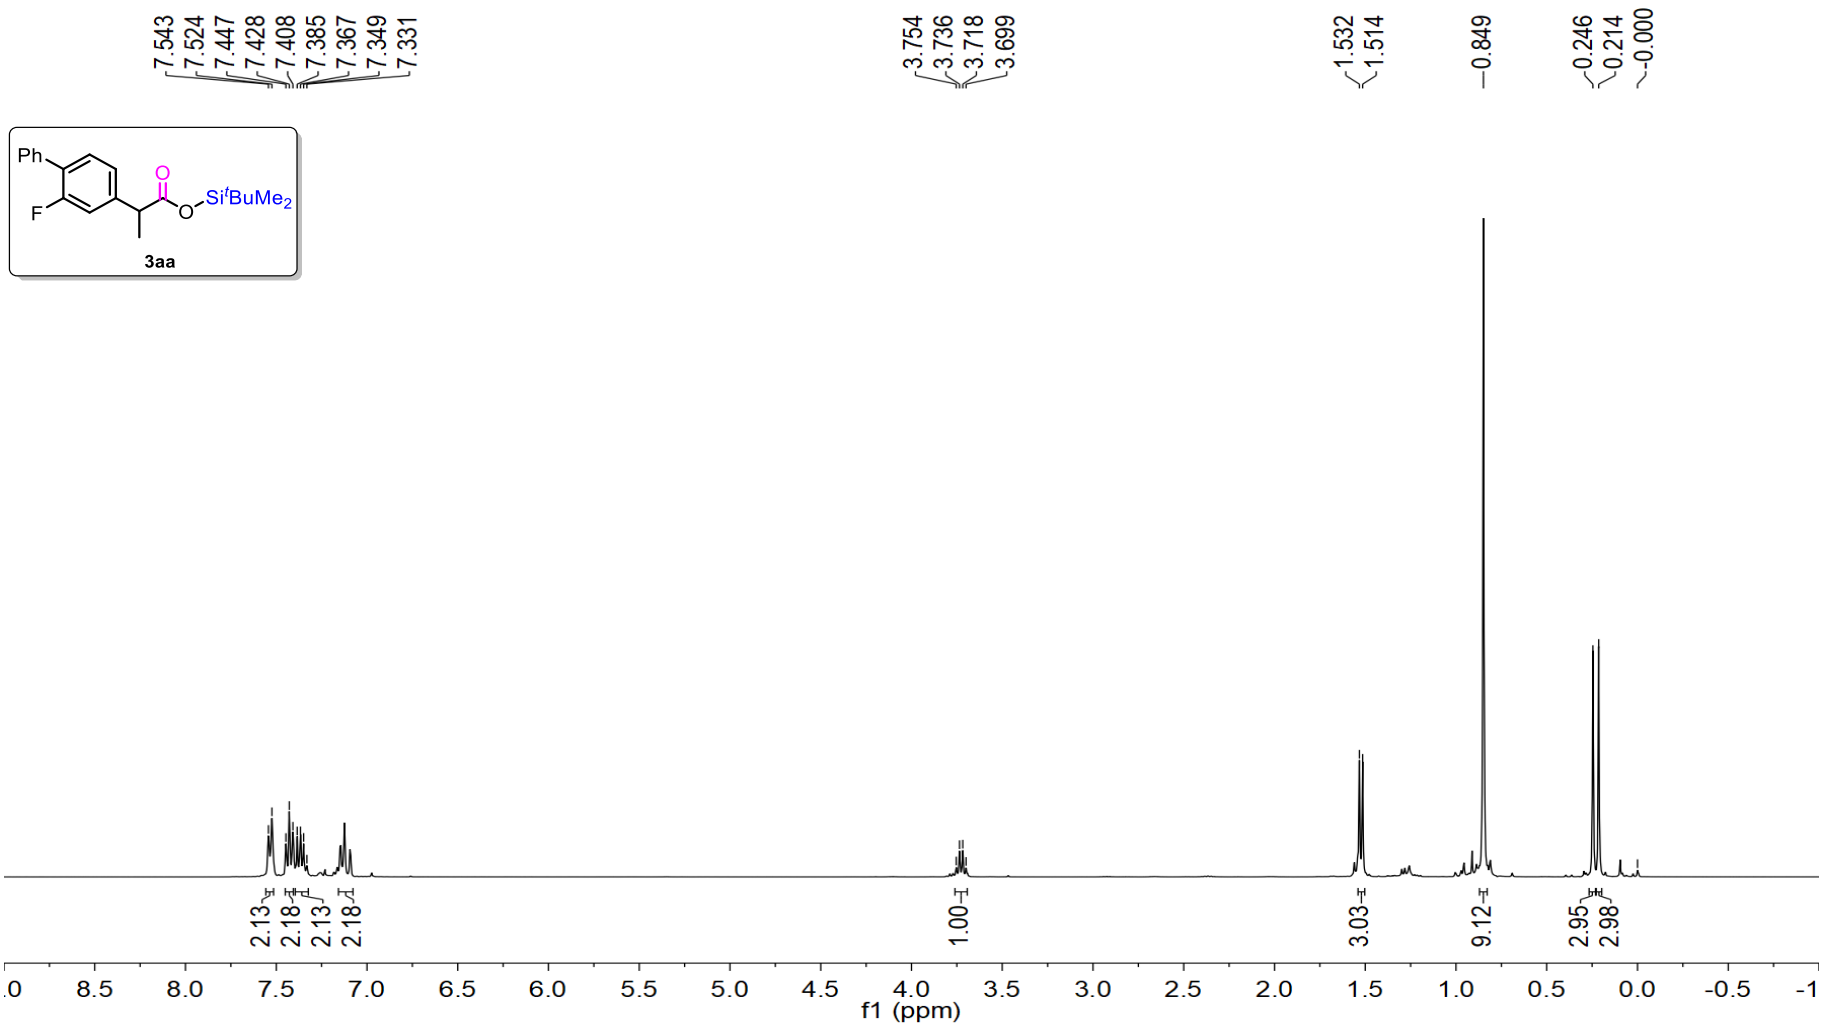

<sup>13</sup>C NMR Spectra (101 MHz, CDCl<sub>3</sub>) of **3aa**

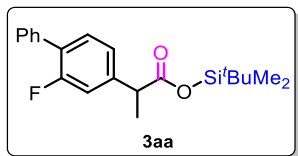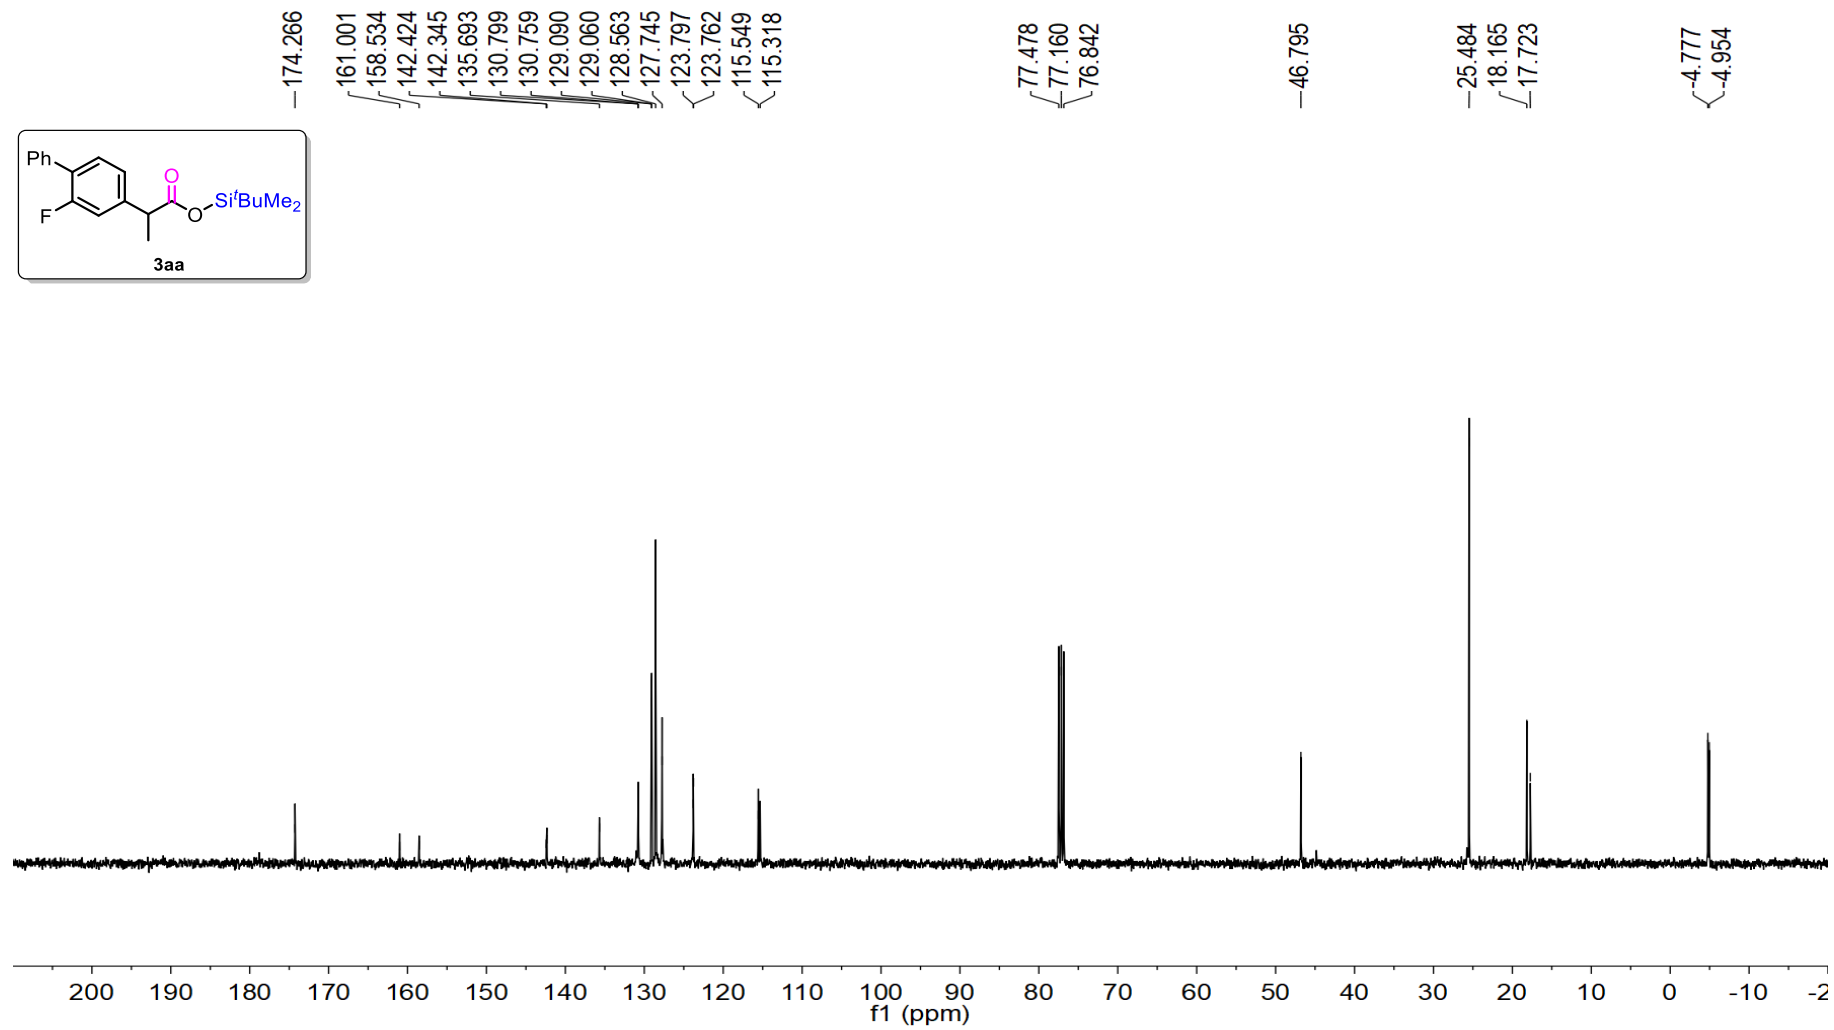

<sup>1</sup>H NMR Spectra (400 MHz, CDCl<sub>3</sub>) of **3ab'**

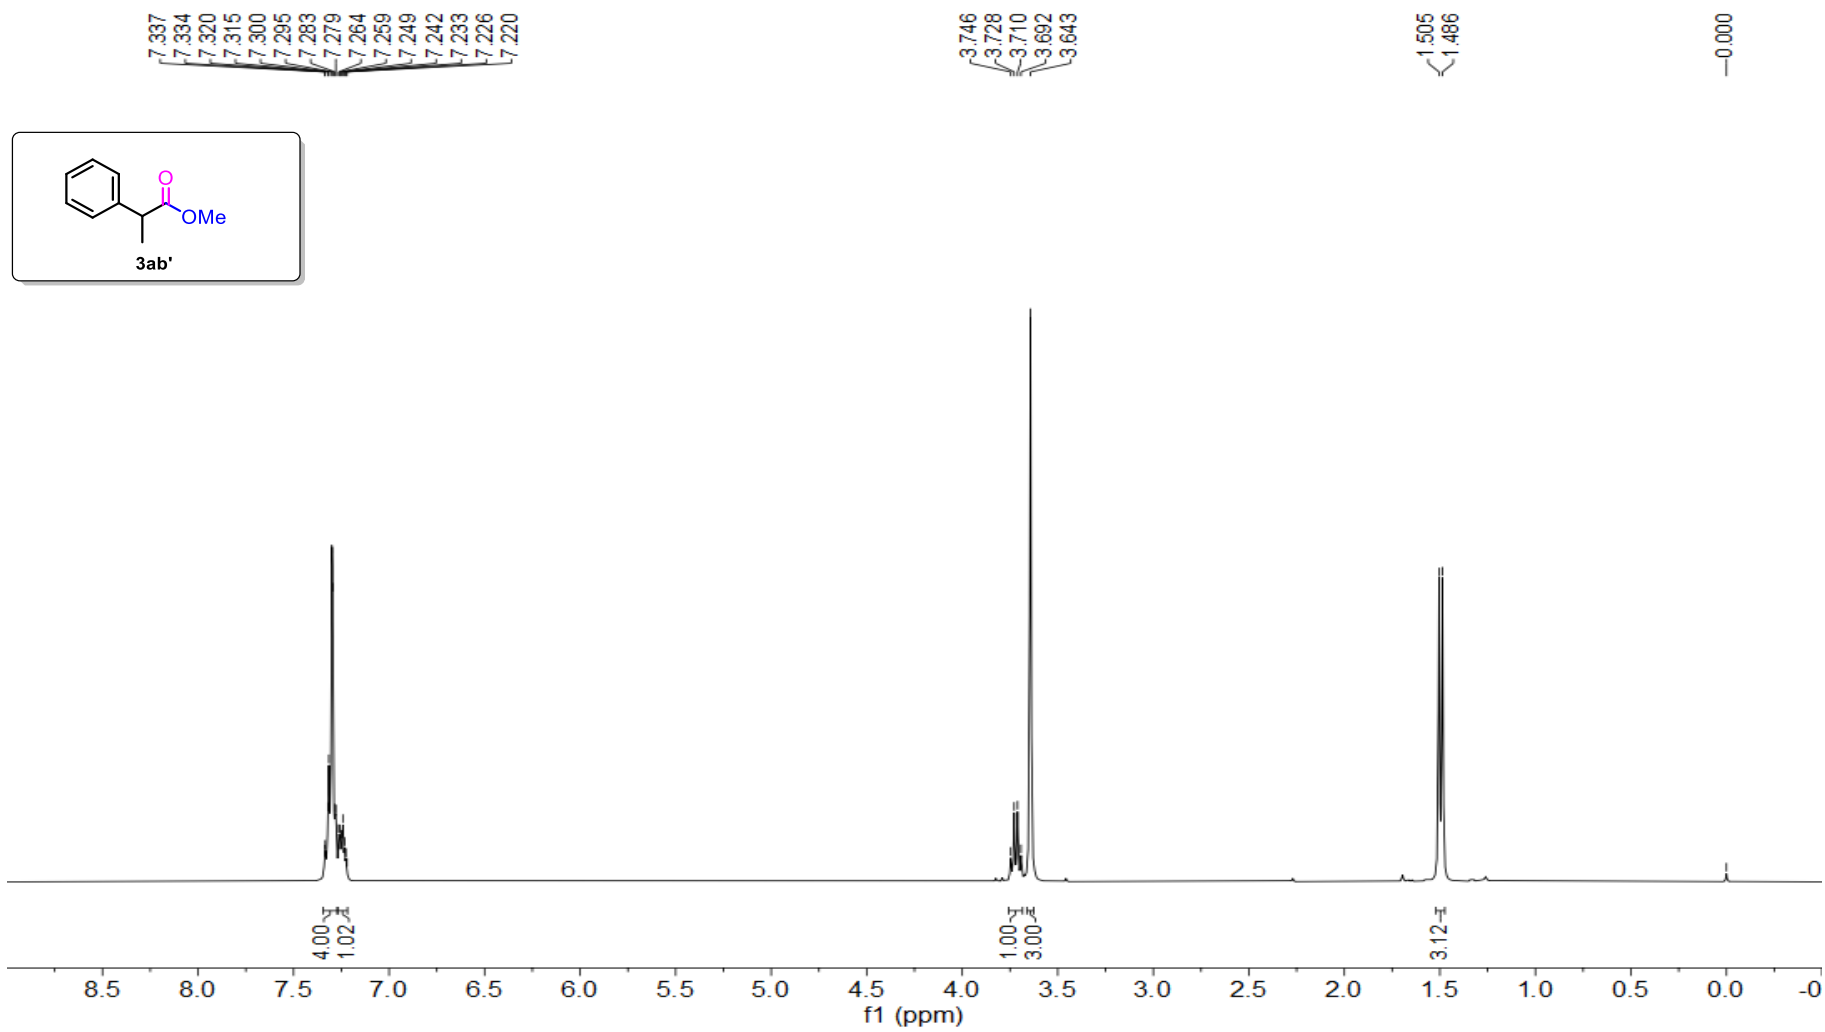

<sup>13</sup>C NMR Spectra (101 MHz, CDCl<sub>3</sub>) of **3ab'**

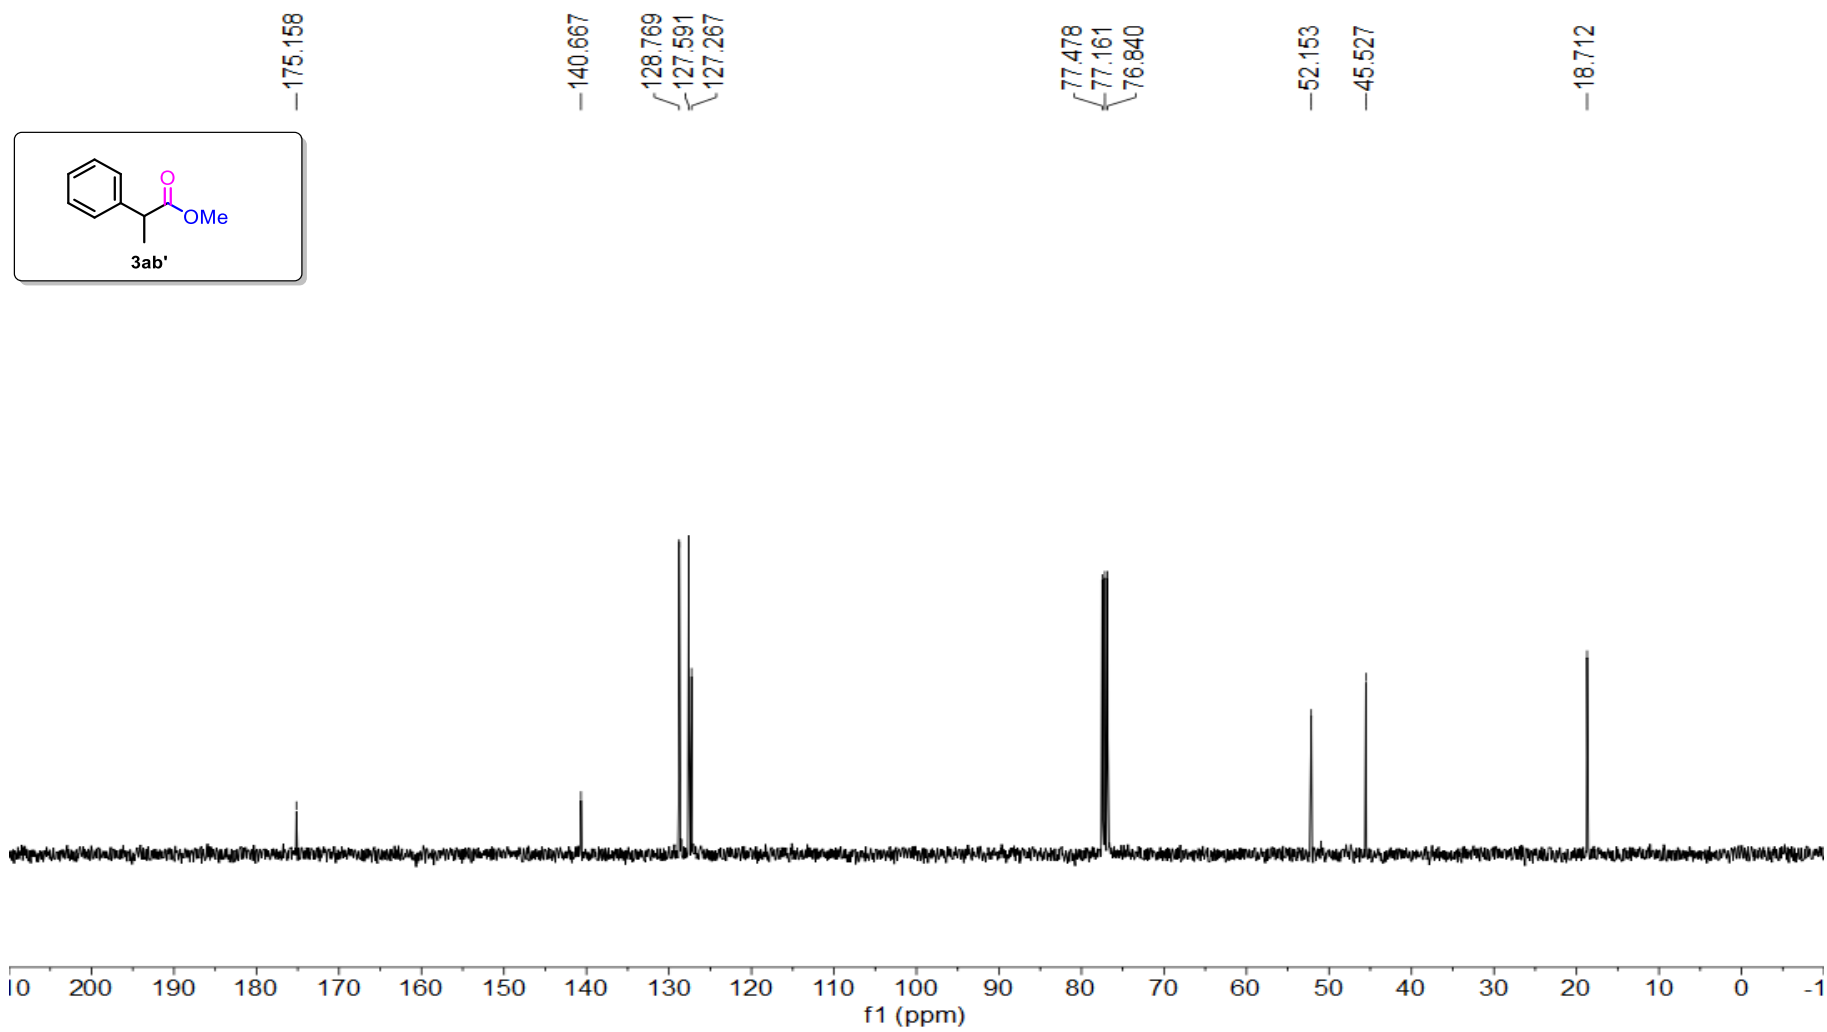

<sup>1</sup>H NMR Spectra (400 MHz, CDCl<sub>3</sub>) of **3ac**

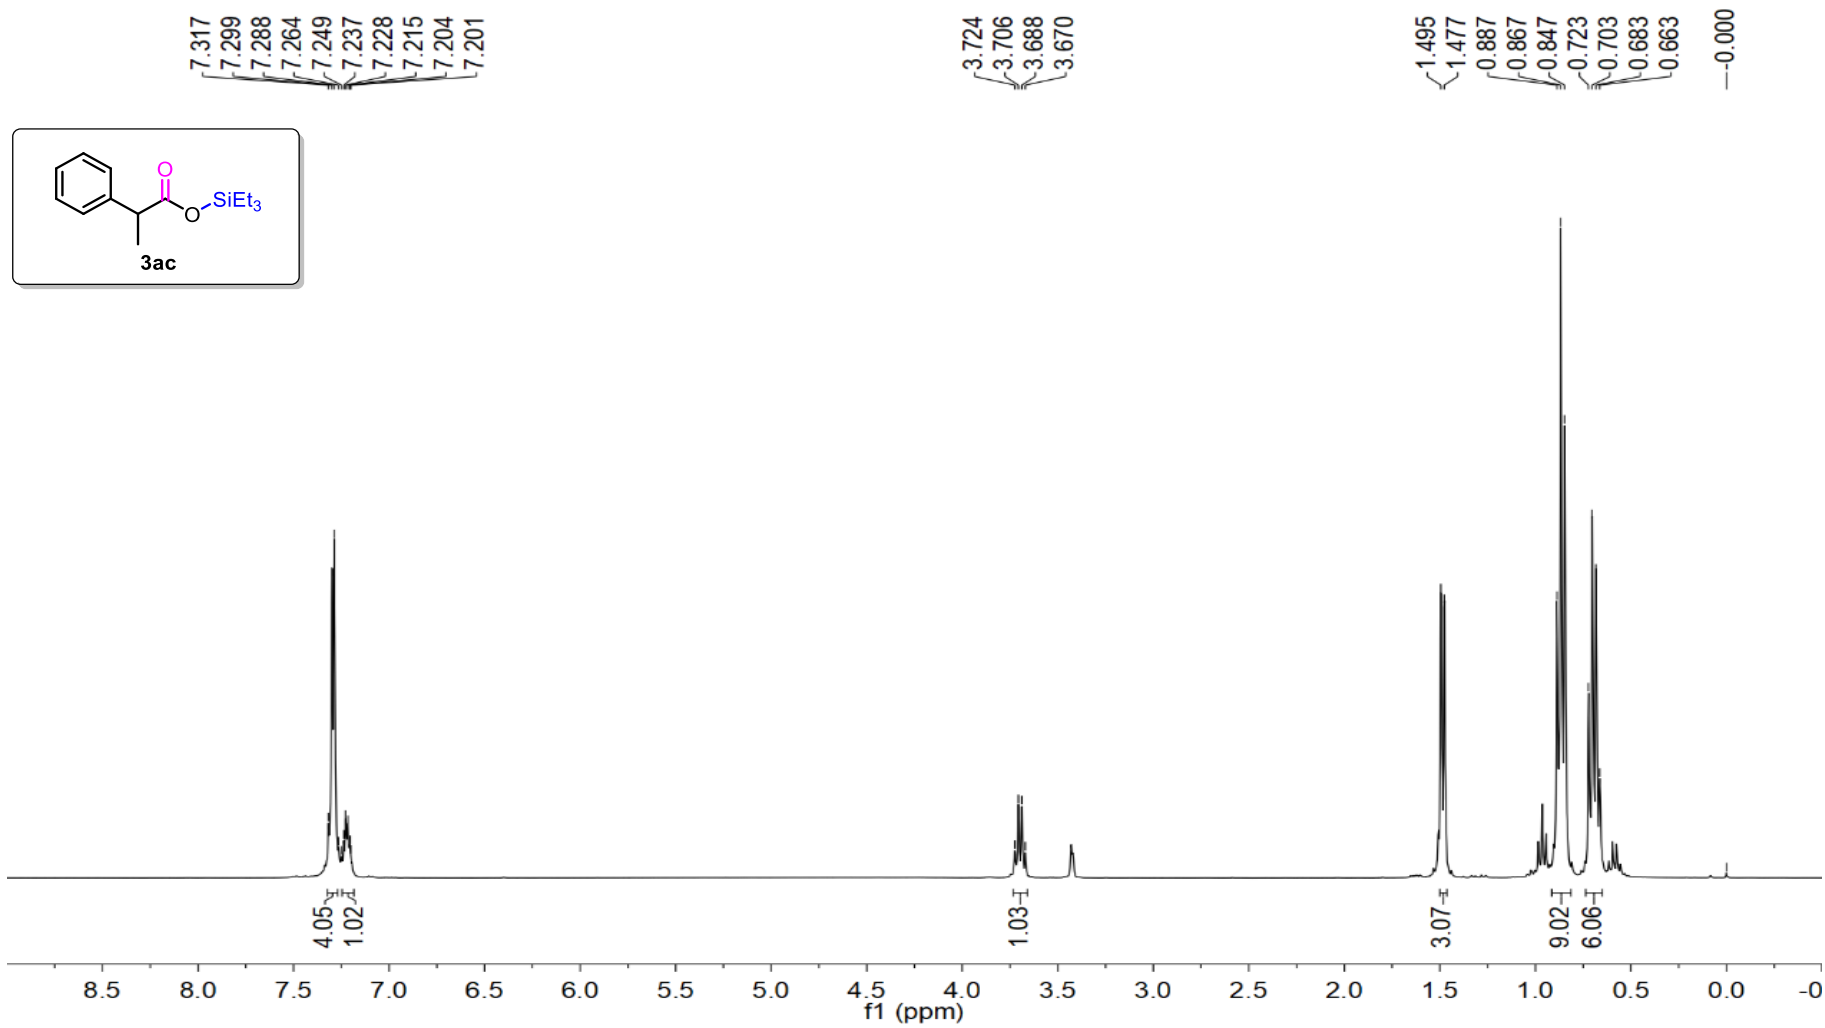

<sup>13</sup>C NMR Spectra (101 MHz, CDCl<sub>3</sub>) of **3ac**

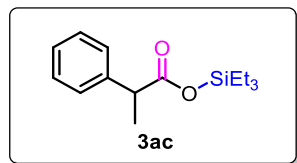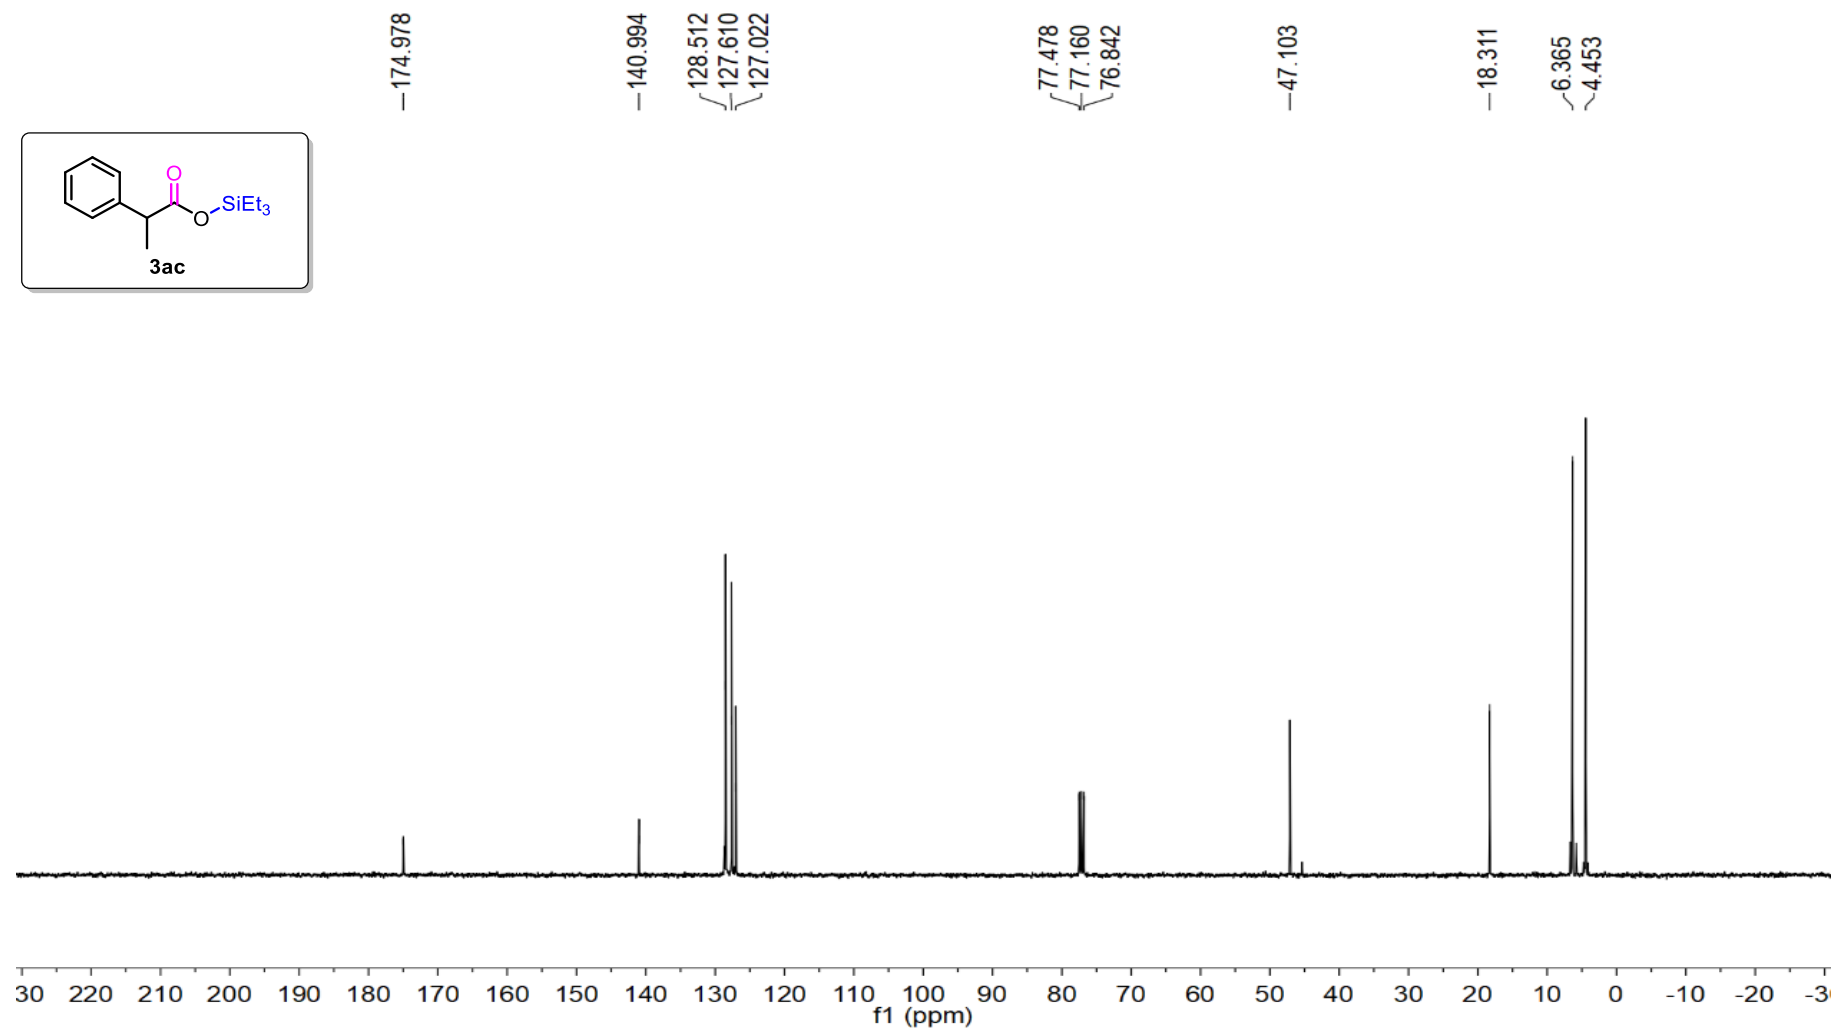

<sup>1</sup>H NMR Spectra (400 MHz, CDCl<sub>3</sub>) of **3ad**

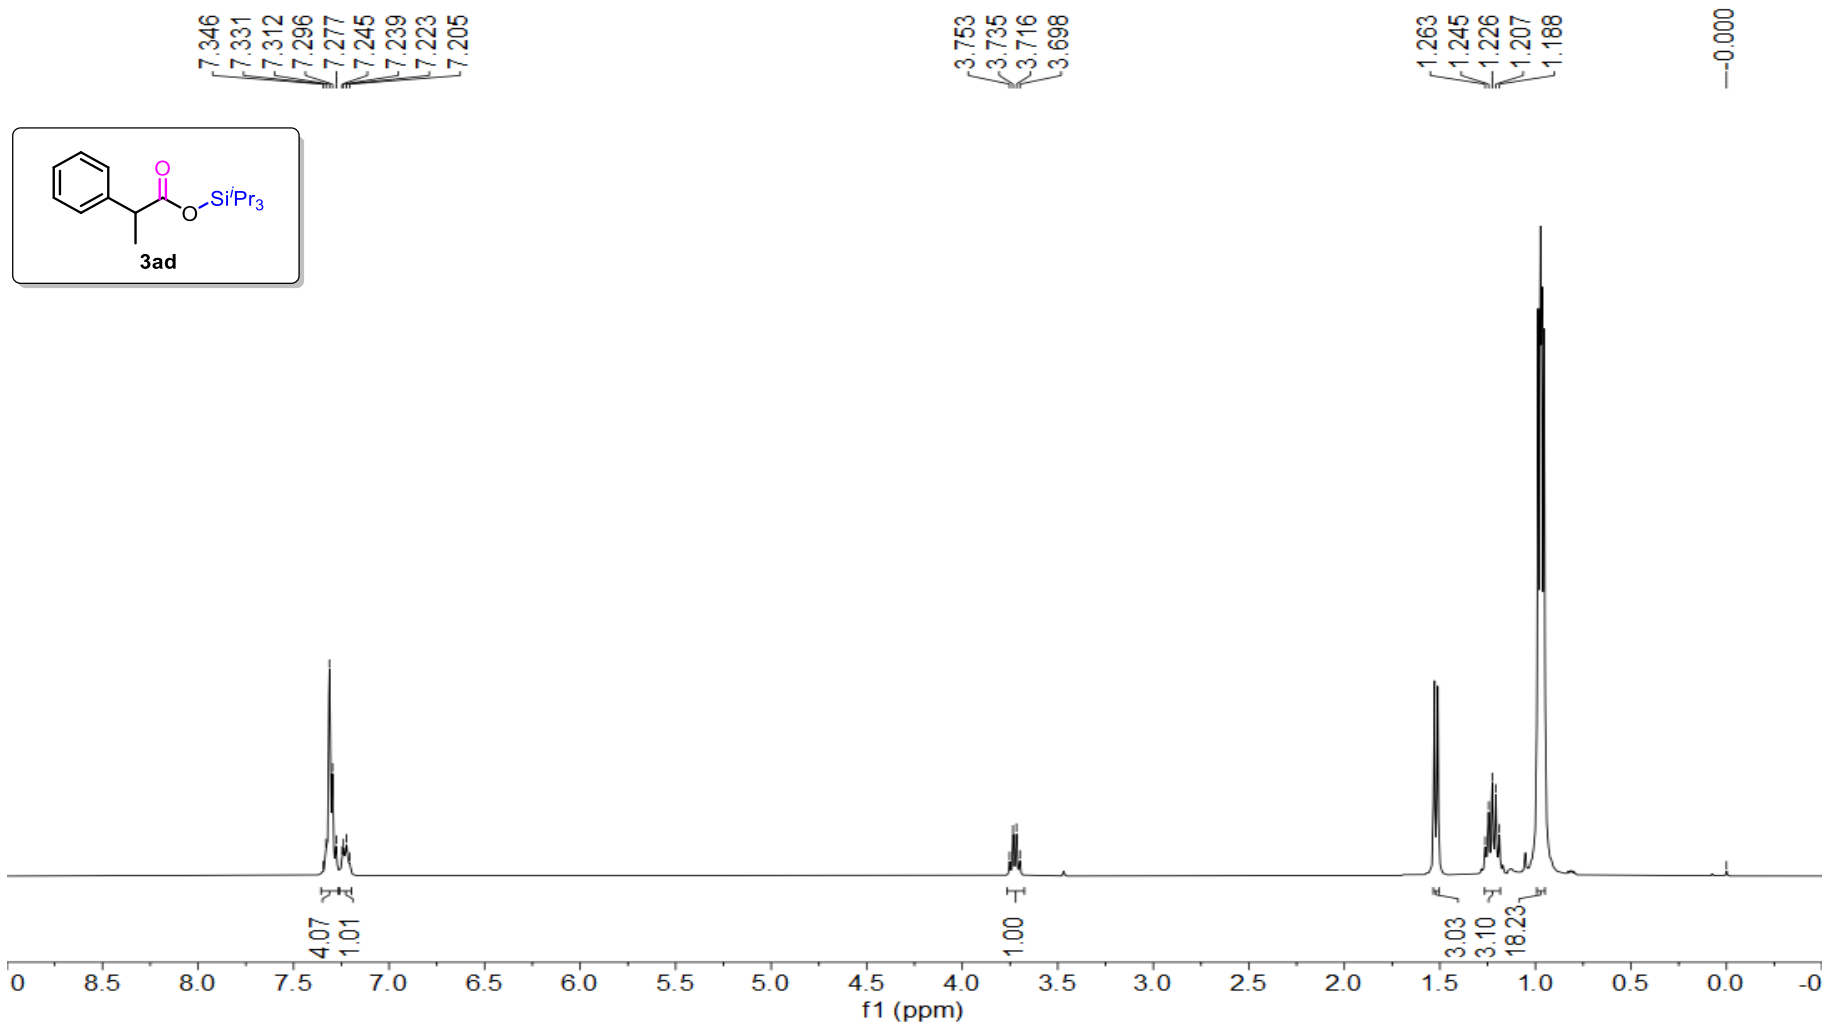

<sup>13</sup>C NMR Spectra (101 MHz, CDCl<sub>3</sub>) of **3ad**

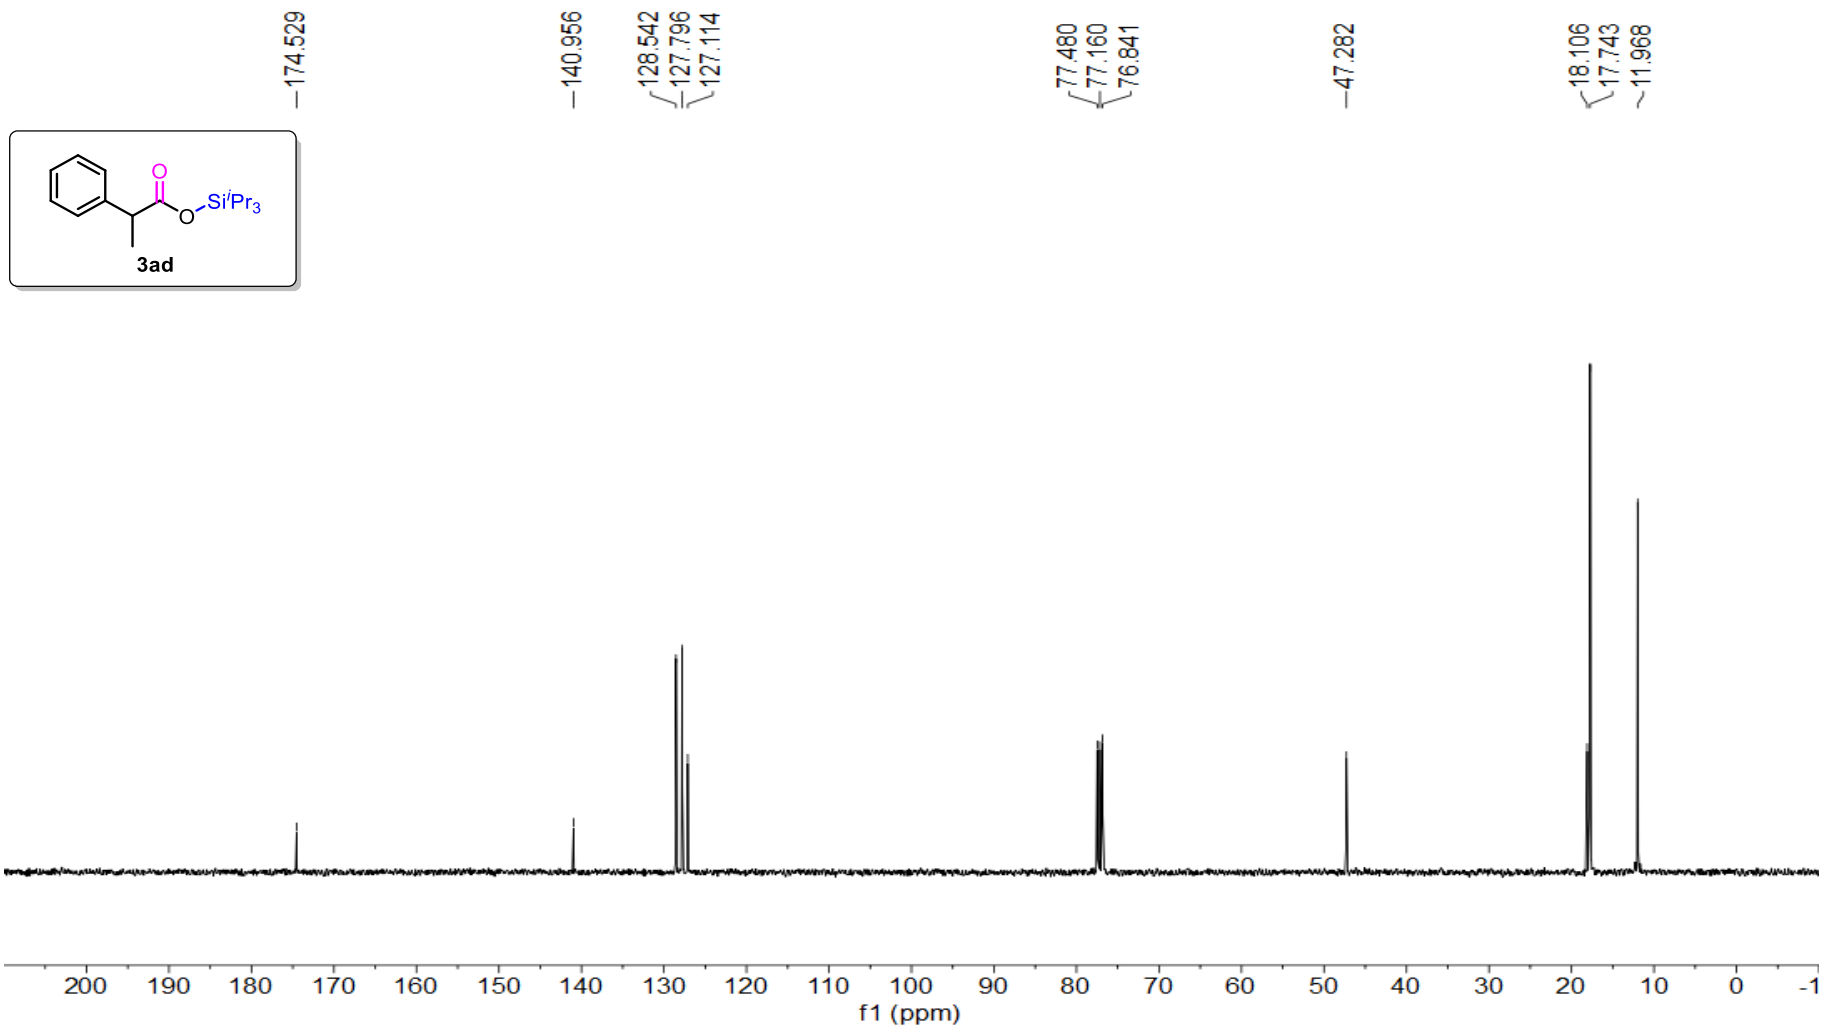



<sup>1</sup>H NMR Spectra (400 MHz, CDCl<sub>3</sub>) of **5a**

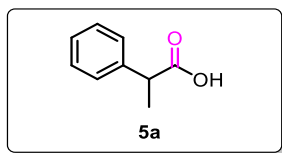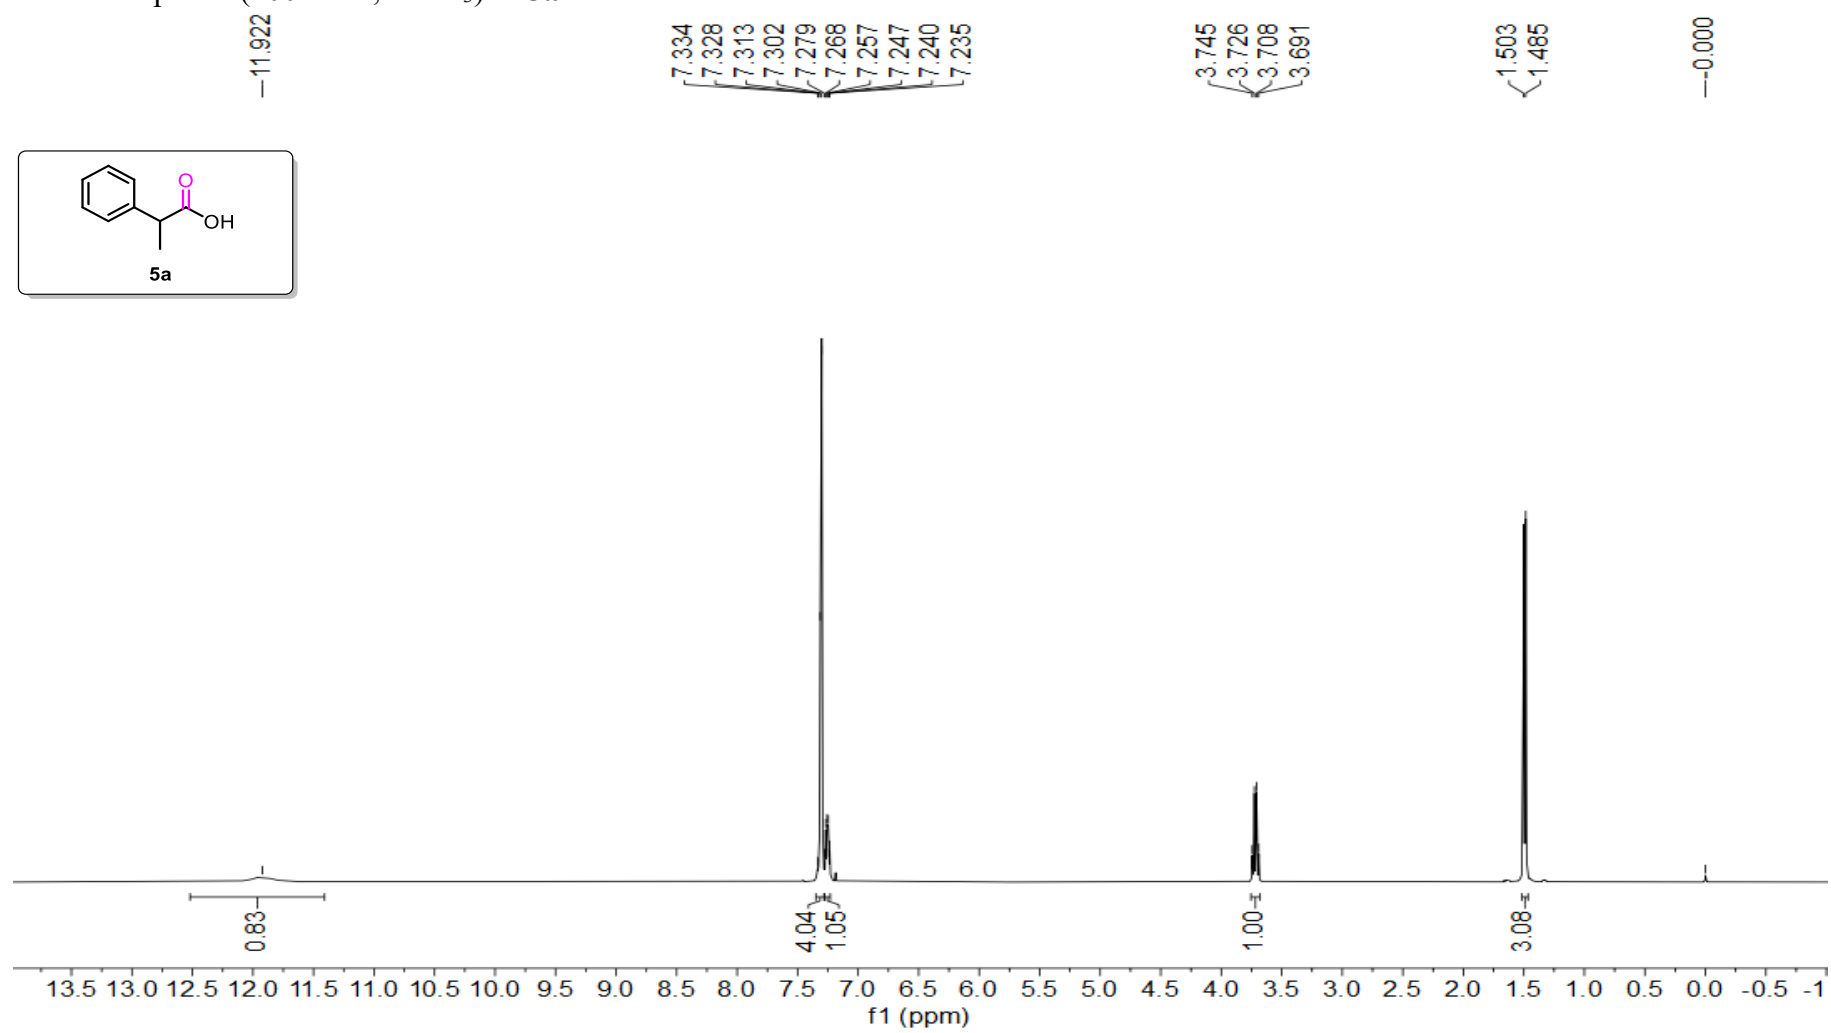

<sup>13</sup>C NMR Spectra (101 MHz, CDCl<sub>3</sub>) of **5a**

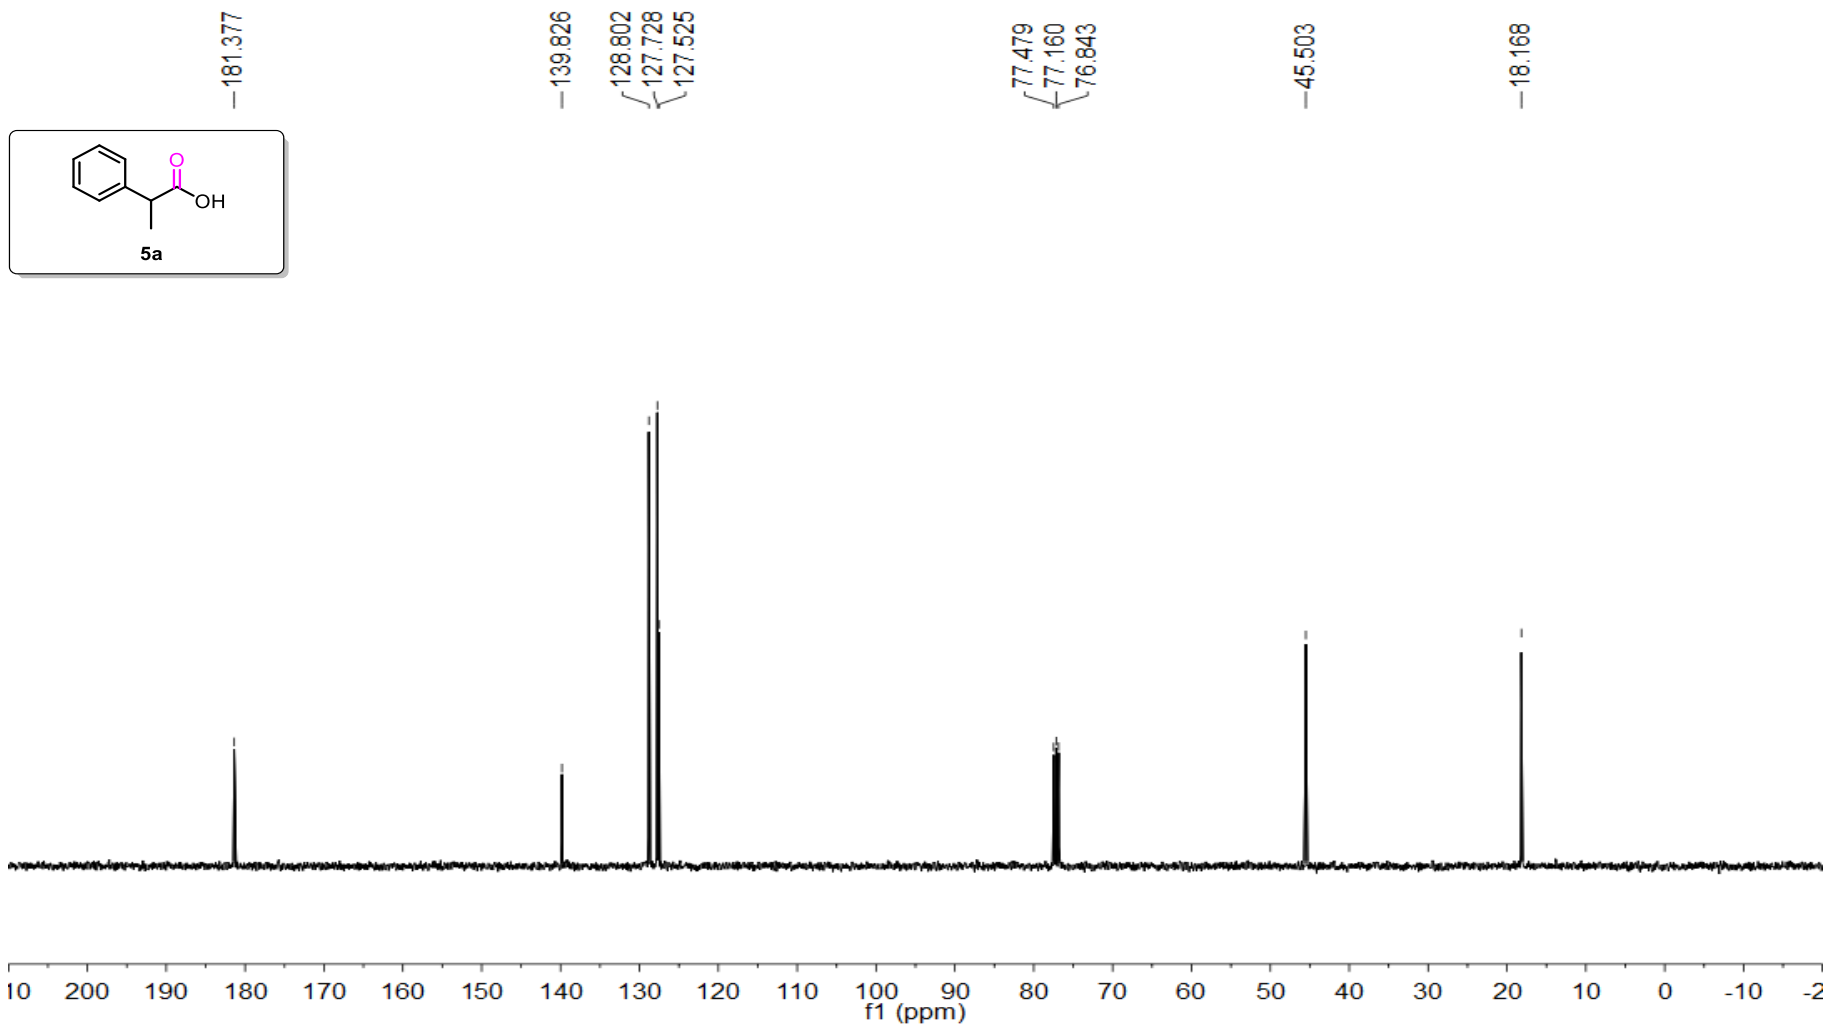

<sup>1</sup>H NMR Spectra (400 MHz, CDCl<sub>3</sub>) of **6**

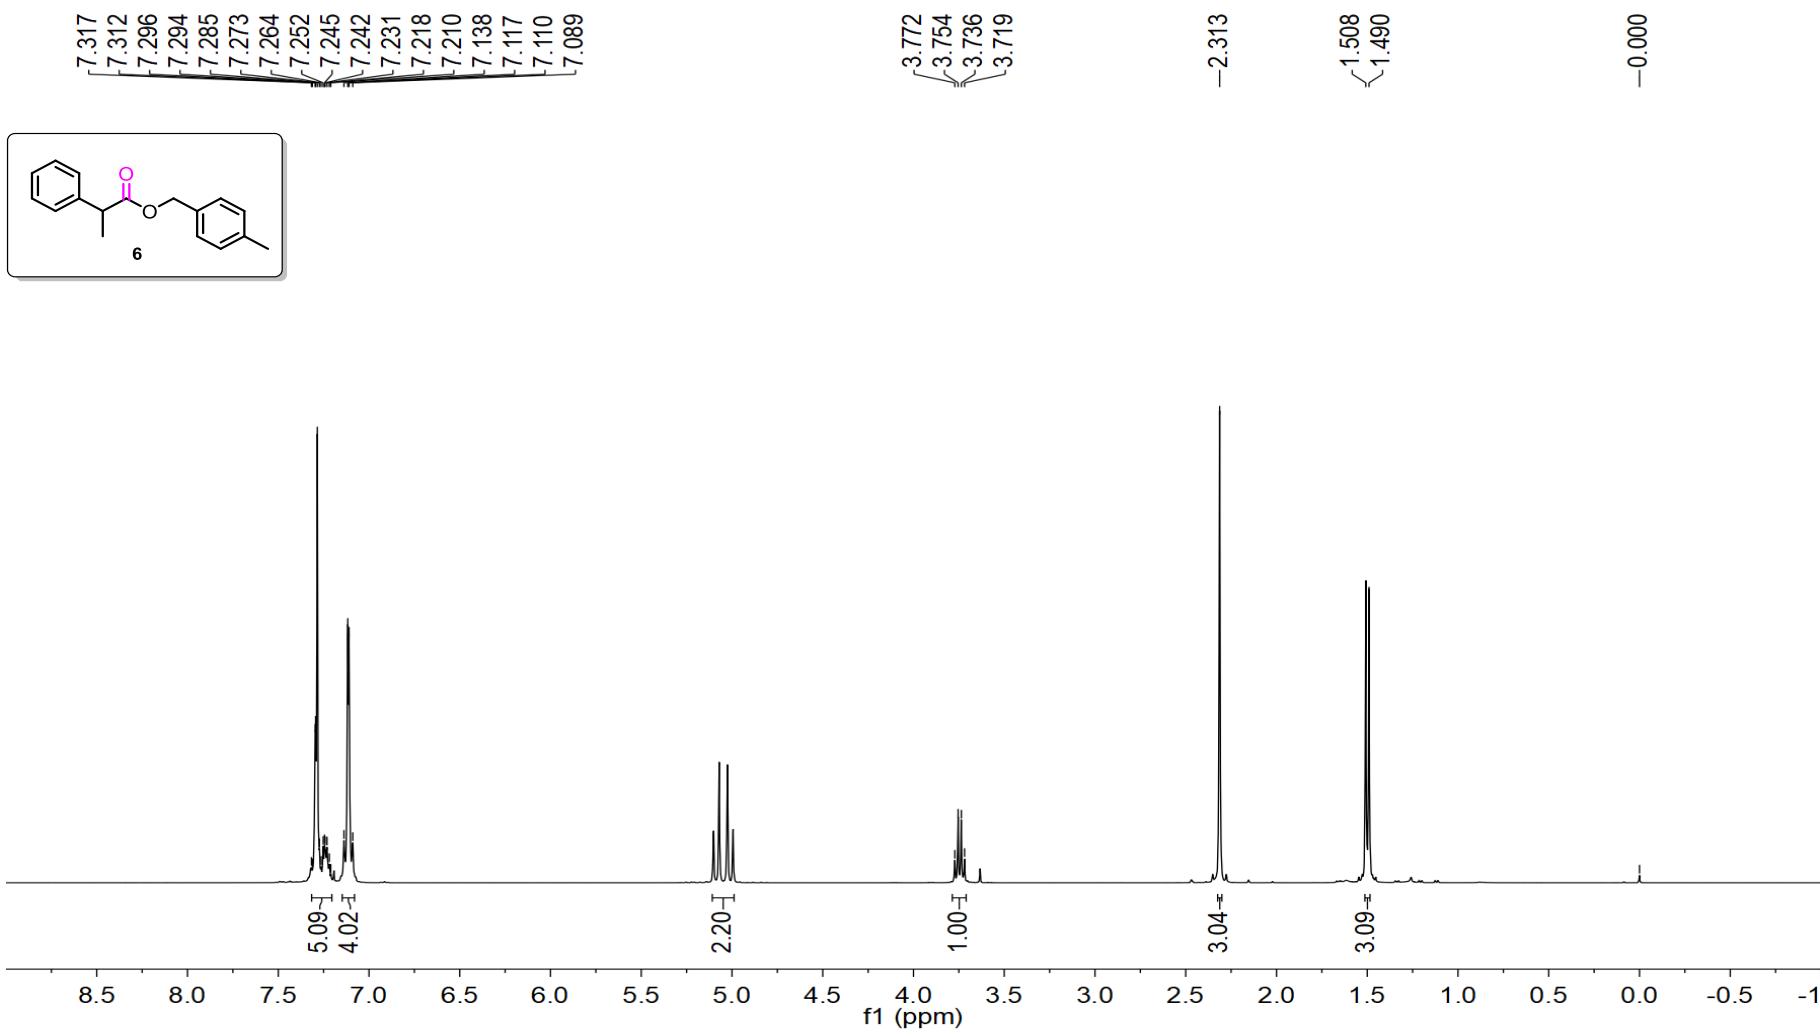

<sup>13</sup>C NMR Spectra (101 MHz, CDCl<sub>3</sub>) of **6**

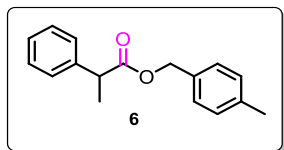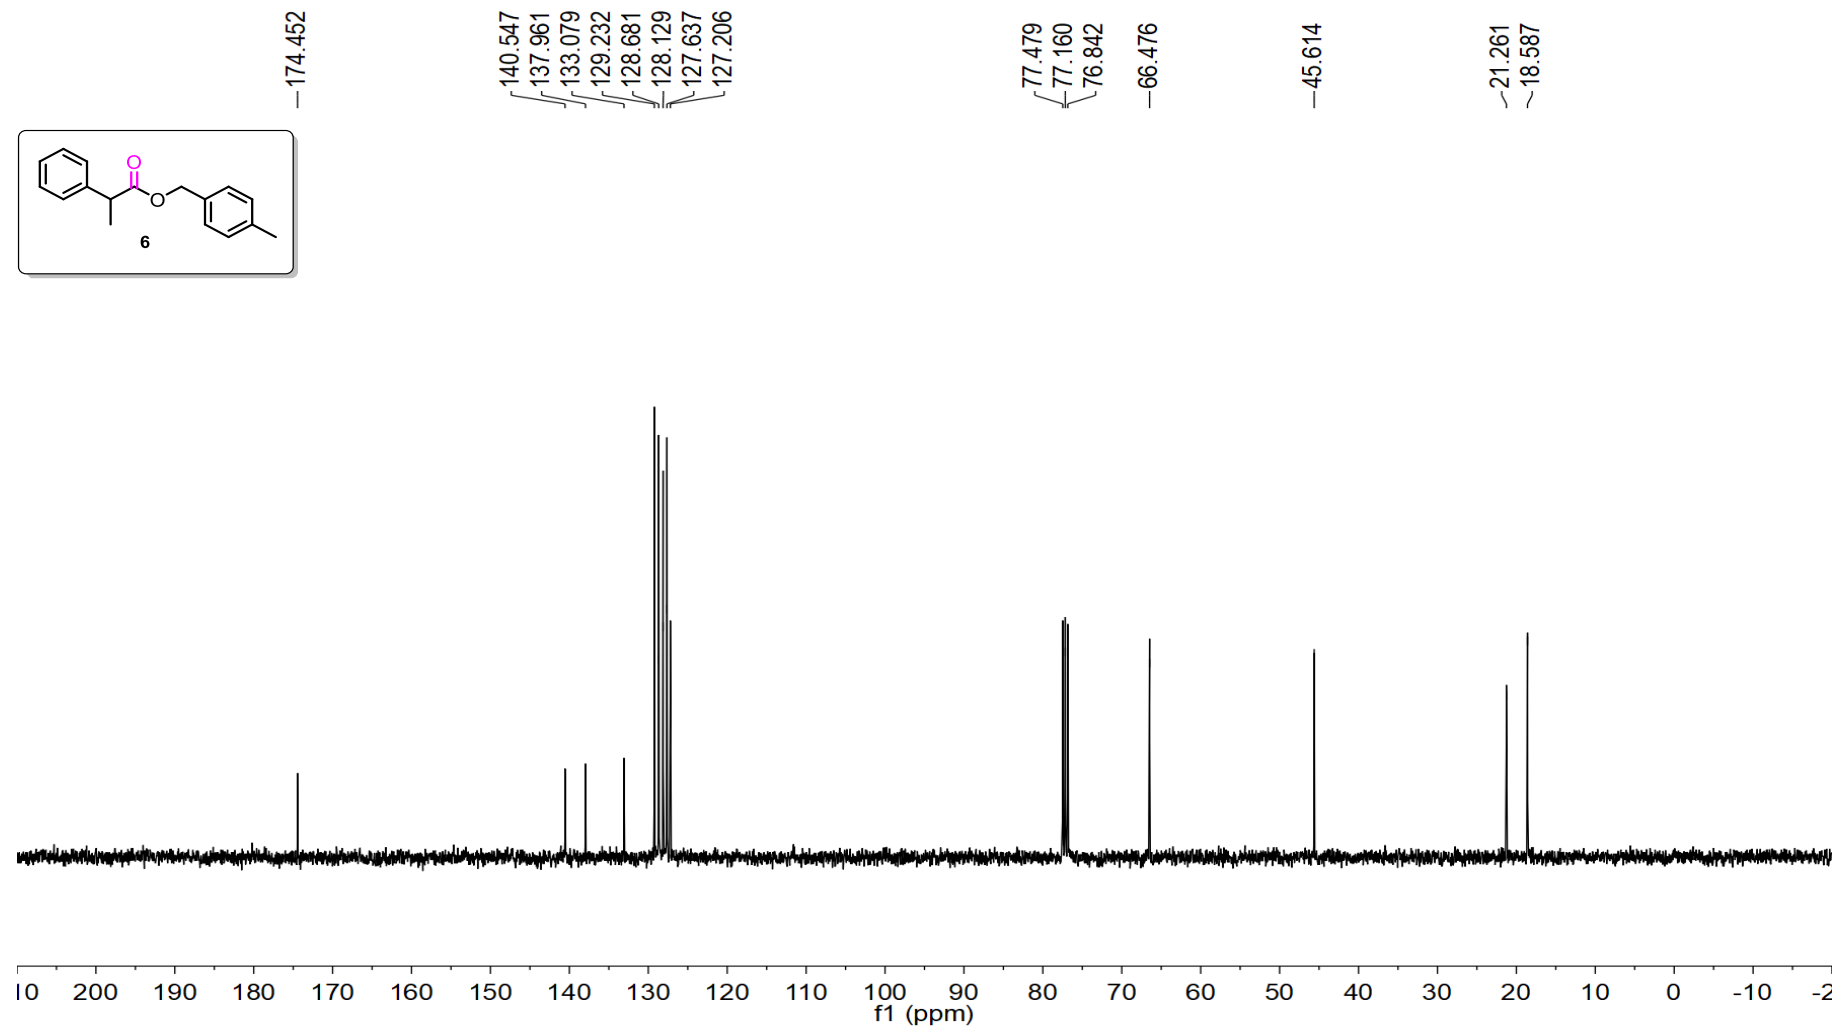

<sup>1</sup>H NMR Spectra (400 MHz, CDCl<sub>3</sub>) of 7

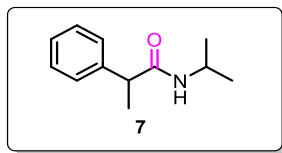

7.360  
7.341  
7.323  
7.293  
7.284  
7.276  
7.266  
7.247

5.168  
4.099  
4.082  
4.065  
4.049  
4.032  
4.014  
3.997  
3.981  
3.529  
3.511  
3.493  
3.475

1.512  
1.494  
1.081  
1.064  
1.030  
1.013

0.000

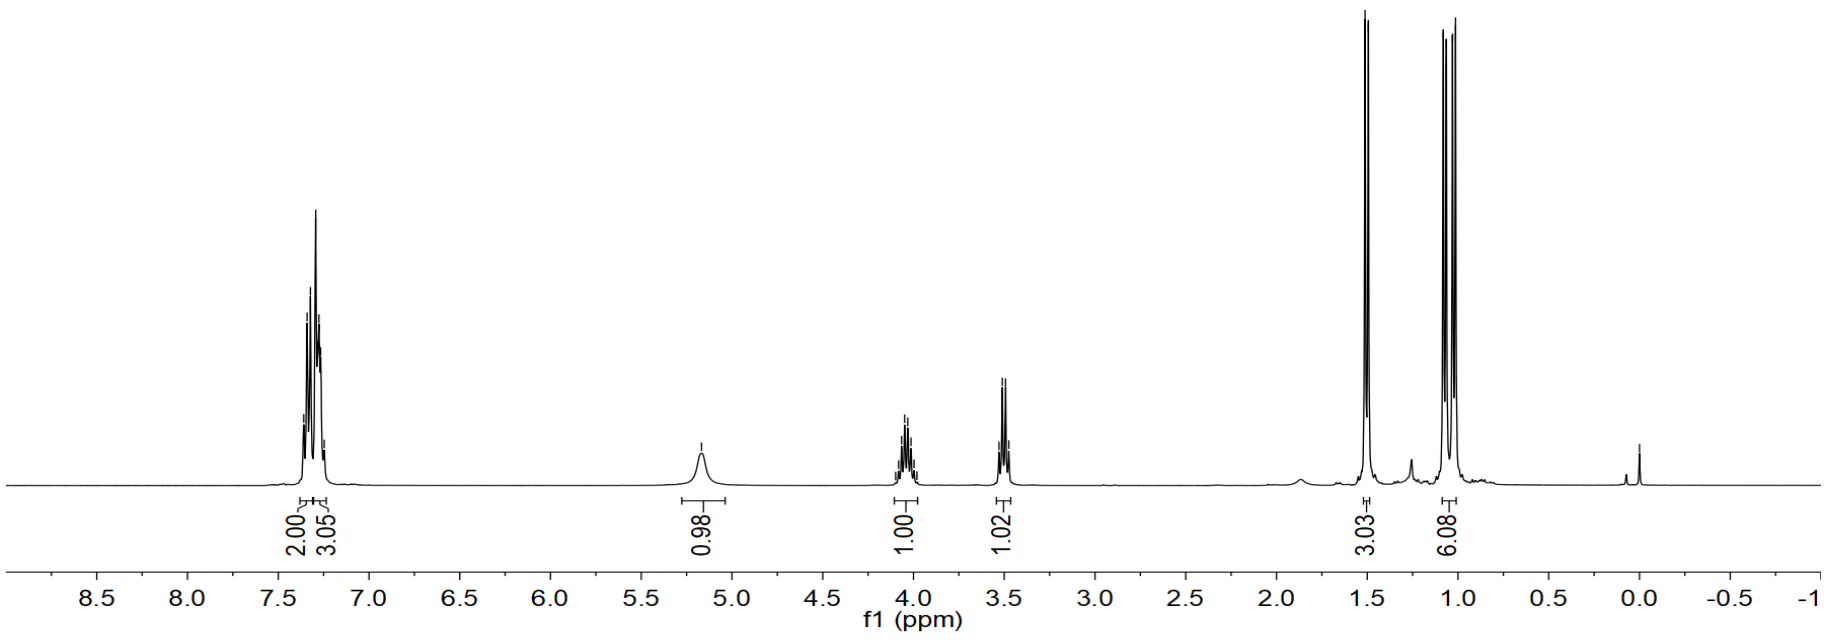

<sup>13</sup>C NMR Spectra (101 MHz, CDCl<sub>3</sub>) of 7

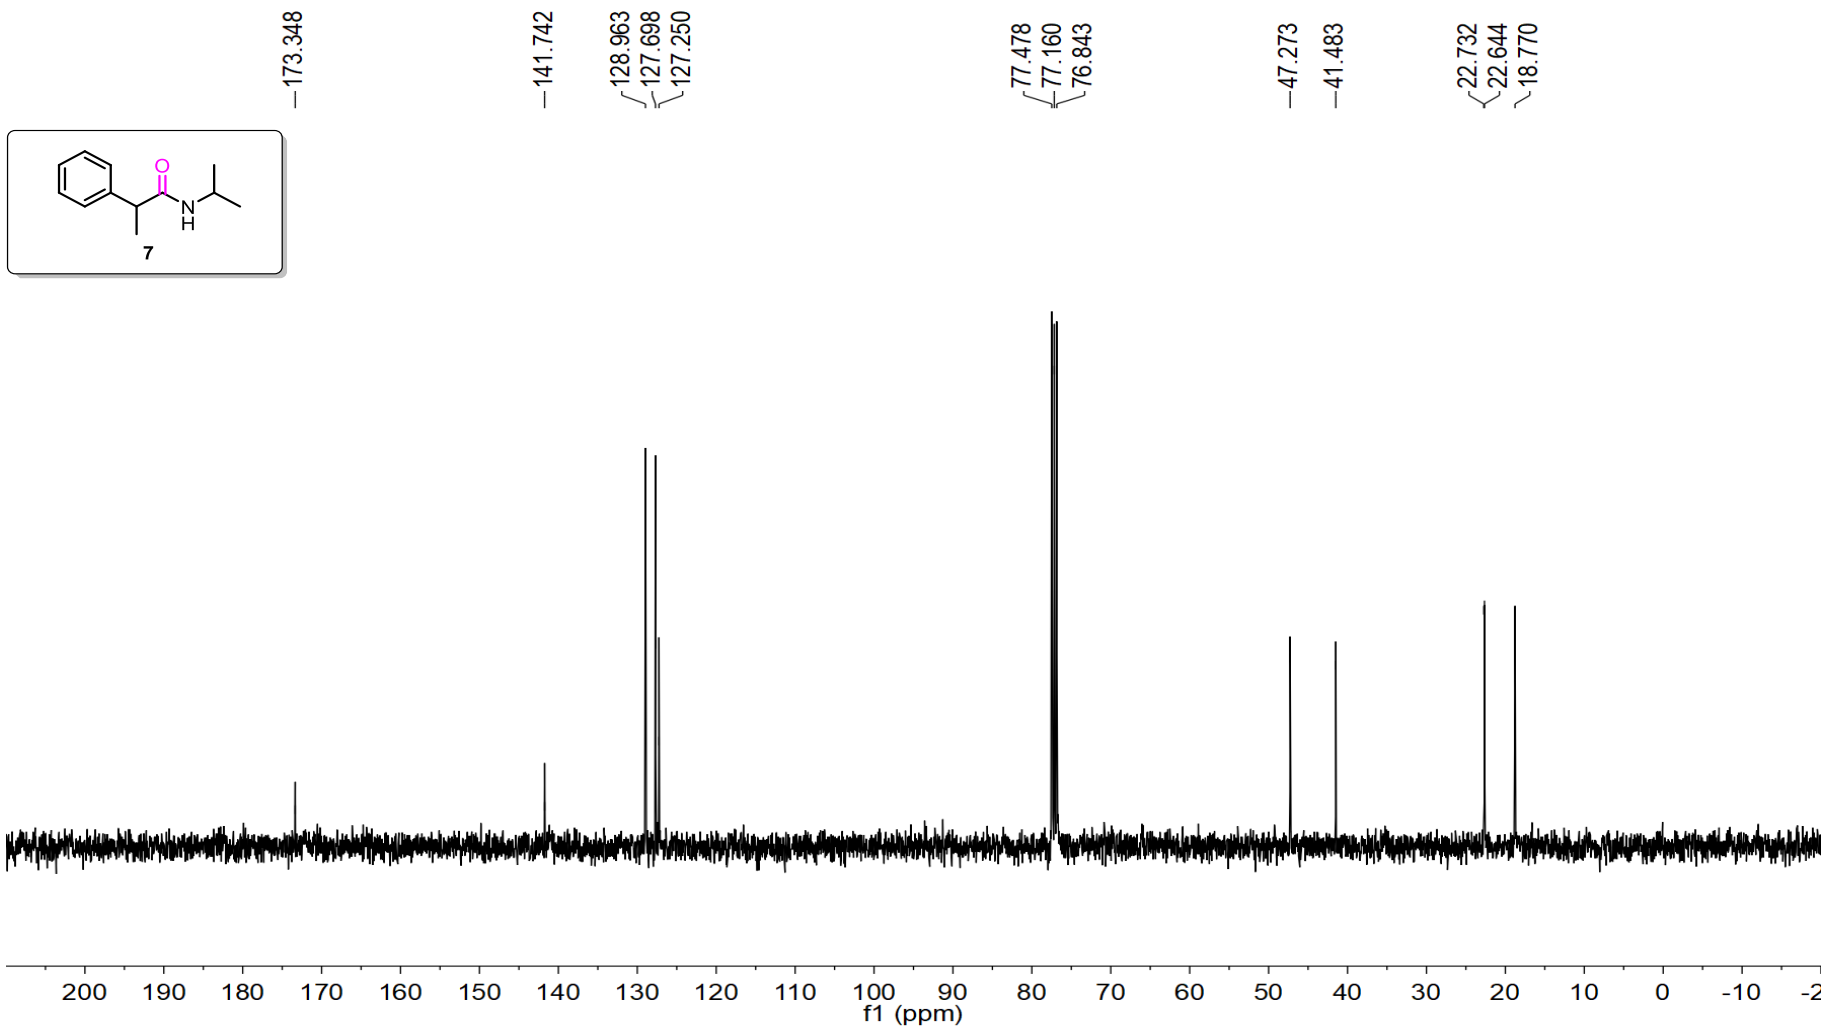

<sup>1</sup>H NMR Spectra (400 MHz, CDCl<sub>3</sub>) of **8**

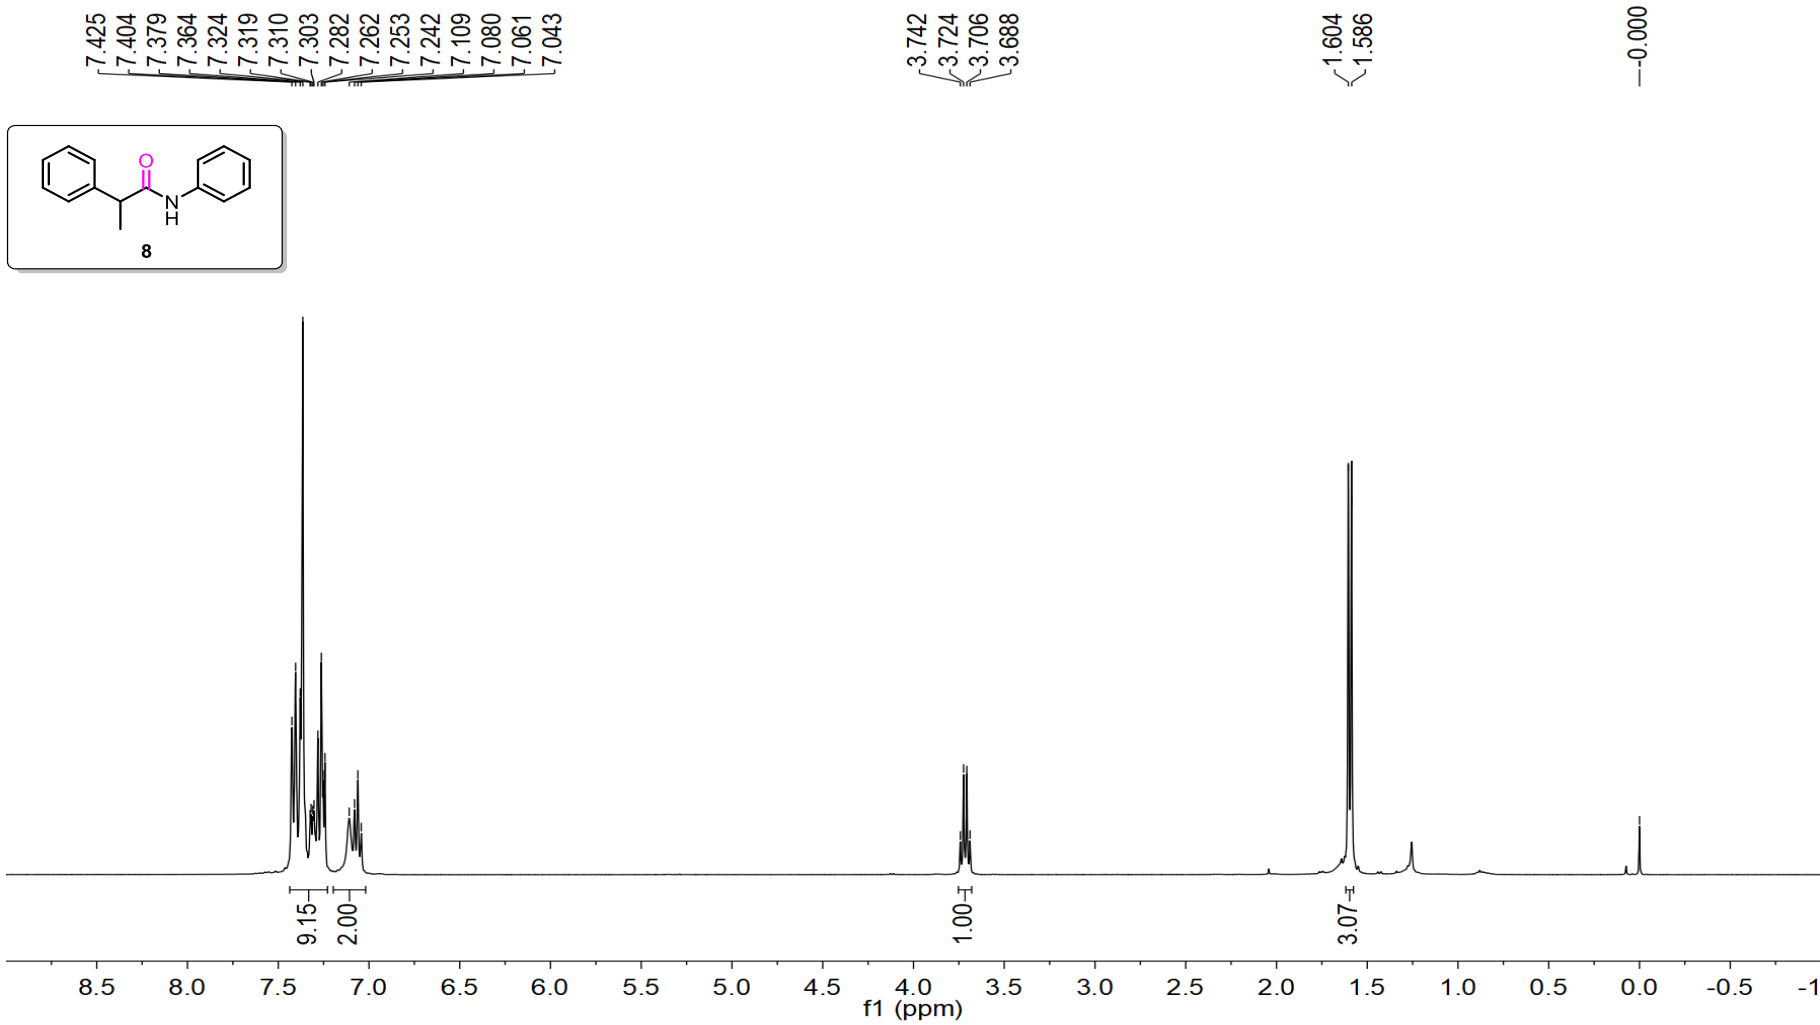

<sup>13</sup>C NMR Spectra (101 MHz, CDCl<sub>3</sub>) of **8**

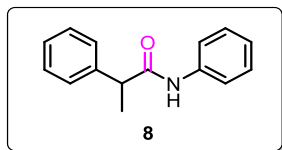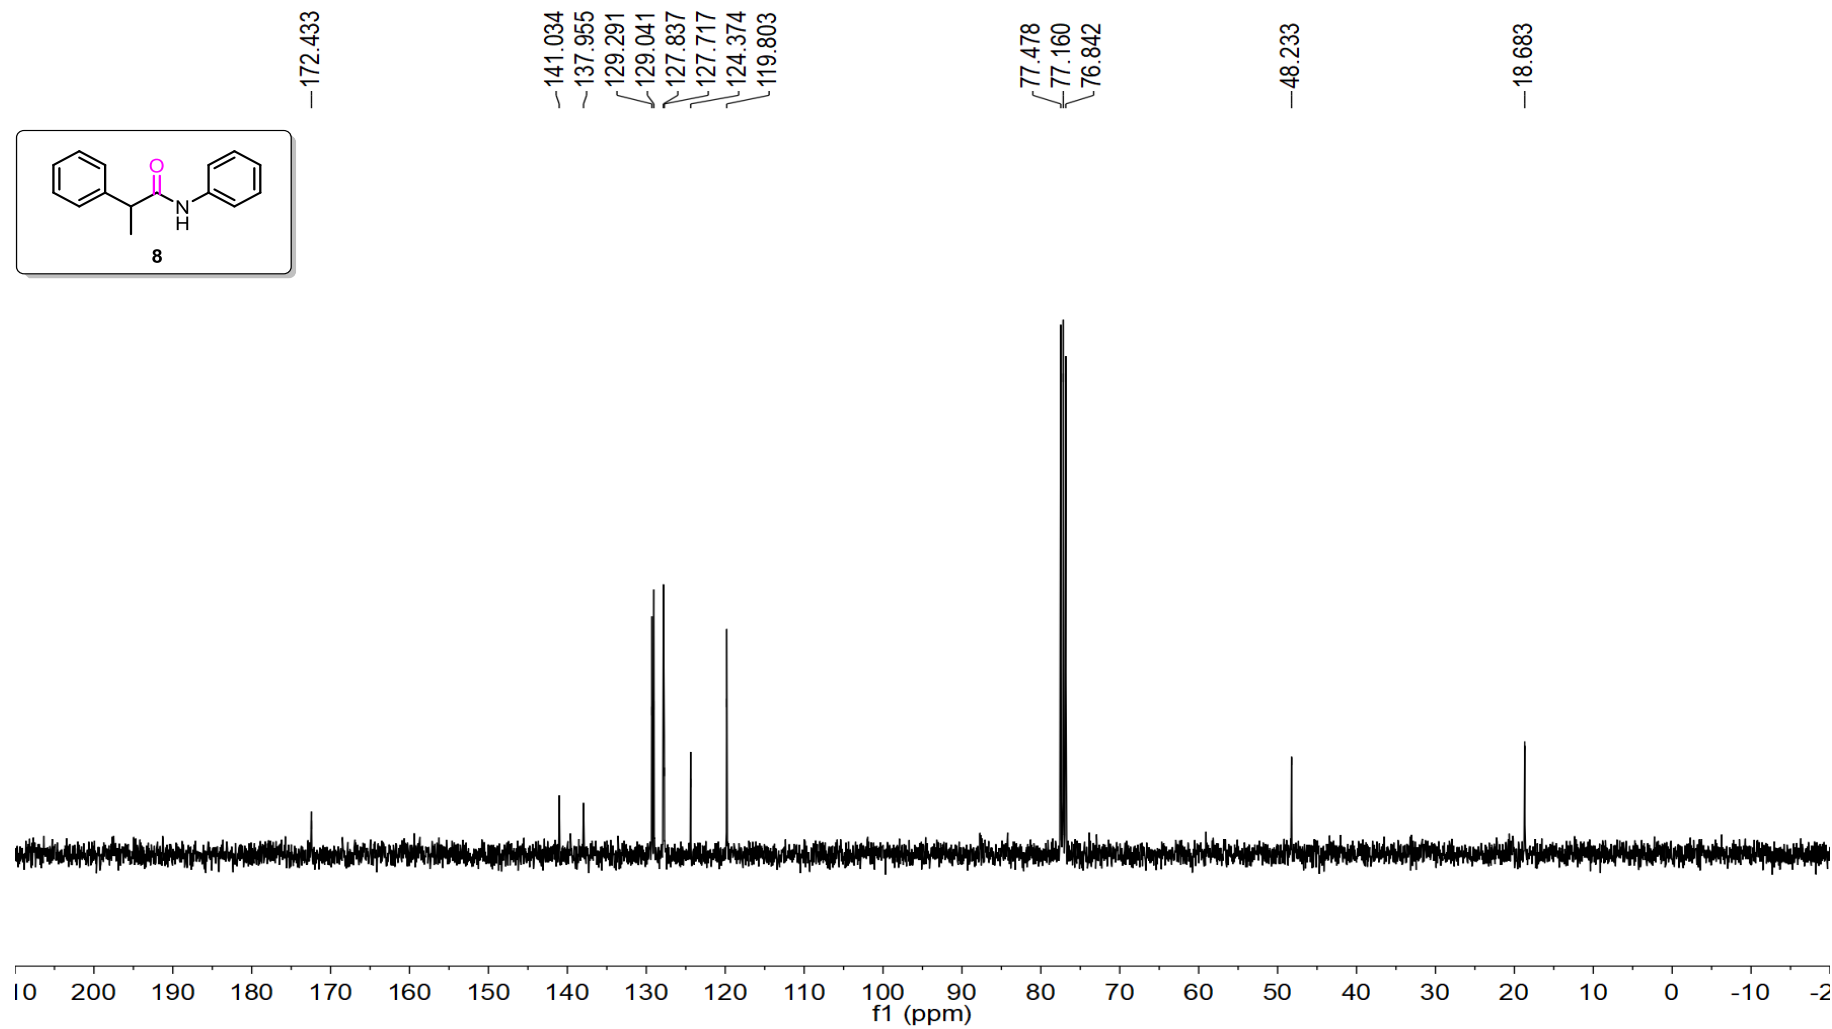

Supplement: d4qo00086b1.pdf [file d4qo00086b1.pdf]
